# Supplementary material for: Visible-light-induced Csp3–H functionalization of glycine derivatives by cerium catalysis
Source: Royal Society of Chemistry journal article supplement (doi:10.1039/d2cc07071e), 2023-01-01

# Electronic Supplementary Information

## Visible-light induced C<sub>sp3</sub>-H functionalization of glycine derivatives by cerium catalysis

Shutao Wang,<sup>a‡</sup> Yanjie Ye,<sup>a‡</sup> Yansong Hu,<sup>a</sup> Xu Meng,<sup>b</sup> Zhao Liu,<sup>b</sup> Jiyu Liu,<sup>a</sup> Kuan Chen,<sup>a</sup> Zhengze Zhang,<sup>a</sup> and Yuan Zhang<sup>a\*</sup>

<sup>a</sup> State Key Laboratory of Applied Organic Chemistry, College of Chemistry and Chemical Engineering, Lanzhou University, 222 Tianshui South Road, Lanzhou 730000, P. R. China.

<sup>b</sup> First Hospital of Lanzhou University, Lanzhou University.

‡ These authors contributed equally to this work.

\*E-mail: zhangyuan@lzu.edu.cn.

## Table of Contents

|                                                                        |     |
|------------------------------------------------------------------------|-----|
| <b>1. Experiment Information</b> .....                                 | S2  |
| <b>2. Optimization of Reaction Conditions</b> .....                    | S6  |
| <b>3. Mechanistic Investigation</b> .....                              | S9  |
| <b>4. Computational Study</b> .....                                    | S13 |
| <b>5. Product Data</b> .....                                           | S31 |
| <b>6. References</b> .....                                             | S47 |
| <b>7. Copies of <sup>1</sup>H and <sup>13</sup>C NMR Spectra</b> ..... | S49 |

## 1. Experiment Information

### 1.1 General information

Unless otherwise noted, all reagents were purchased from commercial sources and used as received without further purification. *N*-arylglycine derivatives<sup>1,2</sup> were prepared according to literature procedures. Unless otherwise indicated, all experiments were carried out under air atmosphere. Irradiation of photochemical reactions was carried out using 18 W blue LED bulb or 5 W LED waveband light source. The silica gel (200–300 meshes) was used for column chromatography and TLC inspections were taken on silica gel GF254 plates. Liquid <sup>1</sup>H and <sup>13</sup>C NMR spectra were recorded on a Bruker Avance III 400 MHz spectrometer. High resolution mass spectra (HRMS) were obtained on a mass spectrometer by using electrospray ionization (ESI) analyzed by quadrupole time-of-flight (QTof).

### 1.2 General procedure for the visible-light-induced oxidative dehydrogenative coupling/aromatization tandem reaction of glycine derivatives and alkenes.

To a solution of *N*-arylglycine derivative **1** (0.2 mmol, 1 eq) and Ce(OTf)<sub>3</sub> (30 mol%) in dry CH<sub>3</sub>CN (4.0 mL) was added styrene derivative (1.0 mmol, 5 eq). The solution was irradiated with 18 W blue LED under air atmosphere at room temperature. After completion of the reaction as monitored by TLC, the solvent was removed under vacuo, and the residue was separated by silica gel column chromatography (with petroleum ether/EtOAc = 8/1 to 4/1 as eluent) to afford the product.

### 1.3 Substrate limitation

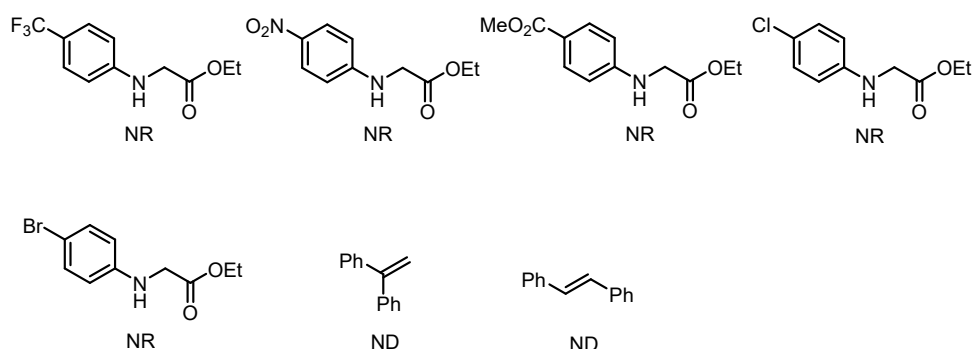

**Fig. S1** Unsuccessful substrates (NR means no reaction; ND means not detected).

#### 1.4 General procedure for the visible-light-induced post-modification of oligopeptides containing glycine residues.

Glycine derived peptide **1** (0.2 mmol, 1 eq) and Ce(OTf)<sub>3</sub> (30 mol%) in dry CH<sub>3</sub>CN (4.0 mL) was added styrene derivative (1.0 mmol, 5 eq). The solution was irradiated with 18 W blue LED under O<sub>2</sub> atmosphere at room temperature. After completion of the reaction as monitored by TLC, the solvent was removed under vacuo, and the residue was separated by silica gel column chromatography (with PE/EA = 4/1 to 2/1 as eluent) to afford the product. *Note: The reaction can also be carried out under air atmosphere, but the reaction rate is relatively slow.*

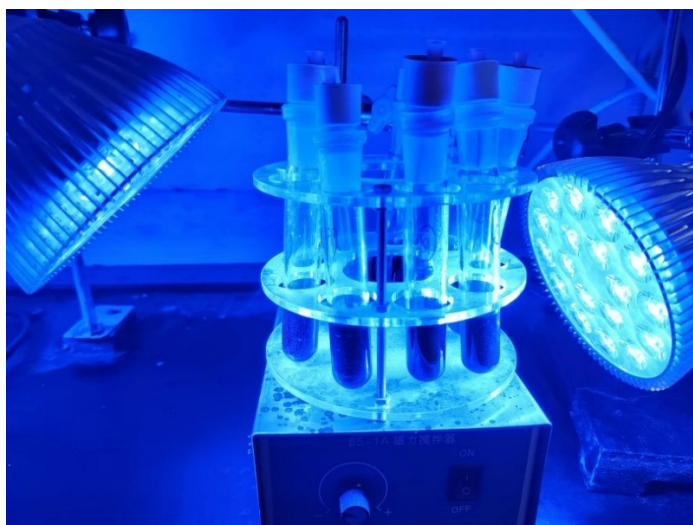

Fig. S2 Picture of photoreaction device.

#### 1.5 Gram-scale synthesis and coupling of glycine ester with other nucleophiles

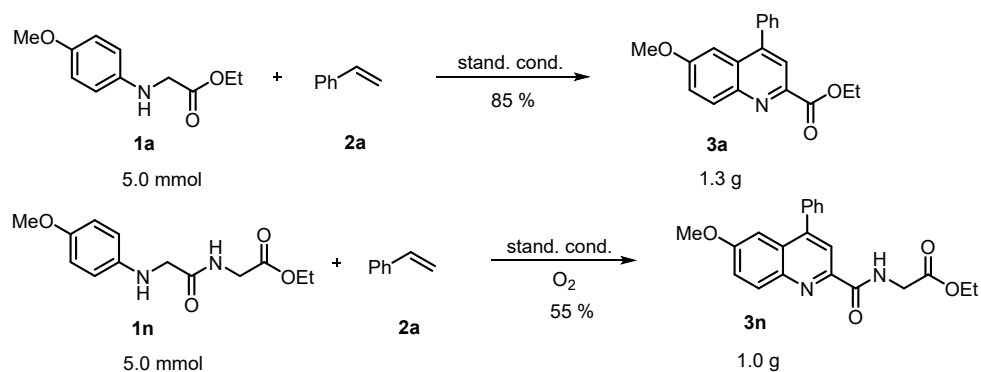

Scheme S1 Gram scale experiment.

To a solution of **1a** (1.05 g, 5.0 mmol, 1 eq) and Ce(OTf)<sub>3</sub> (0.88 g, 30 mol%) in dry CH<sub>3</sub>CN (100 mL) was added **2a** (2.60 g, 25.0 mmol, 5 eq). The mixed solution was irradiated with 18 W blue LED under air atmosphere at room temperature. After

completion of the reaction as monitored by TLC, the solvent was removed under vacuo, and the residue was separated by silica gel column chromatography (with petroleum ether/EtOAc = 8/1 to 4/1 as eluent) to afford the product **3a** (1.30 g, 85 % yield) as a white solid.

To a solution of **1n** (1.33 g, 5.0 mmol, 1 eq) and Ce(OTf)<sub>3</sub> (0.88 g, 30 mol%) in dry CH<sub>3</sub>CN (100 mL) was added **2a** (2.60 g, 25.0 mmol, 5 eq). The mixed solution was irradiated with 18 W blue LED under O<sub>2</sub> atmosphere at room temperature. After completion of the reaction as monitored by TLC, the solvent was removed under vacuo, and the residue was separated by silica gel column chromatography (with petroleum ether/EtOAc = 4/1 to 2/1 as eluent) to afford the product **3n** (1.00 g, 55 % yield) as a white solid.

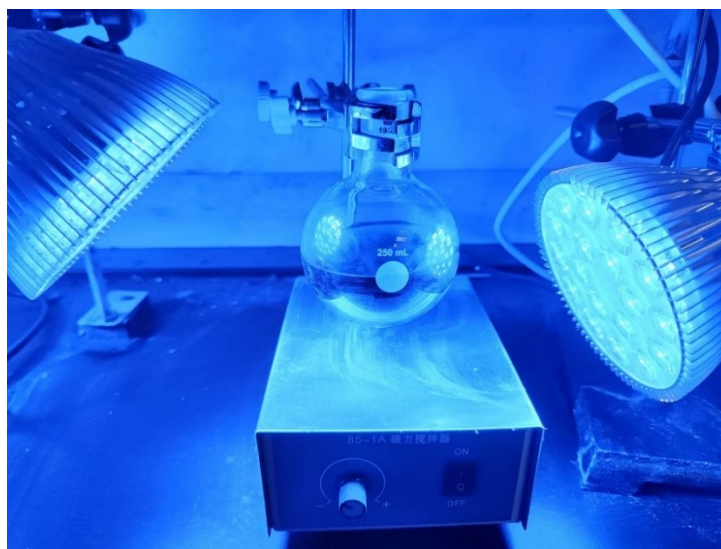

**Fig. S3** Picture of set-up for the gram scale reaction.

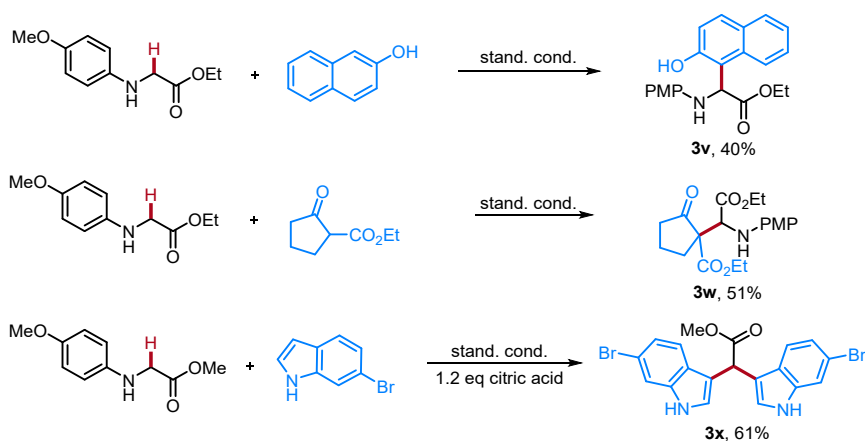

### Scheme S2 Reactions of **1** with other nucleophiles.

To a solution of *N*-arylglycine derivative **1** (0.2 mmol, 1 eq) in dry CH<sub>3</sub>CN (4.0 mL) were added Ce(OTf)<sub>3</sub> (30 mol%). The mixed solution was irradiated with 18 W blue LED under air atmosphere at room temperature. After **1** completely transformed into imine **5** as monitored by TLC, other nucleophiles (2-naphthol, 1,3-dicarbonyl compound and indole) were added. After completion of the reaction as monitored by TLC, the solvent was removed under vacuo, and the residue was separated by silica gel column chromatography to afford the corresponding coupling product.

## 2. Optimization of Reaction Conditions

Table S1. Screening of light sources <sup>a</sup>

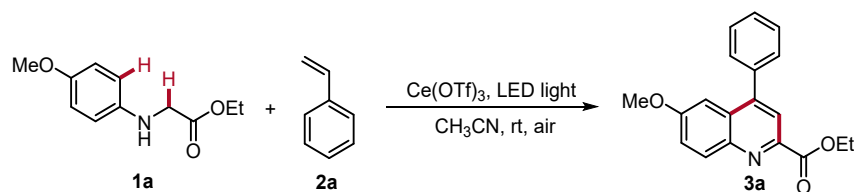

| Entry    | Light Source    | Yield (%) <sup>b</sup> |
|----------|-----------------|------------------------|
| 1        | 365-375 nm      | 67                     |
| 2        | 380-385 nm      | 85                     |
| 3        | 390-400 nm      | 82                     |
| <b>4</b> | <b>Blue LED</b> | <b>95</b>              |
| 5        | White LED       | 82                     |
| 6        | Green LED       | 65                     |
| 7        | dark            | trace                  |

<sup>a</sup> Reaction conditions: **1a** (0.1 mmol), **2a** (0.5 mmol),  $\text{Ce}(\text{OTf})_3$  (30 mol%),  $\text{CH}_3\text{CN}$  (2.0 mL), LED light irradiation under air at room temperature. <sup>b</sup> Yields were determined by  $^1\text{H}$  NMR analysis using 1,3,5-trimethoxybenzene as an internal standard.

**Table S2.** Screening of catalysts <sup>a</sup>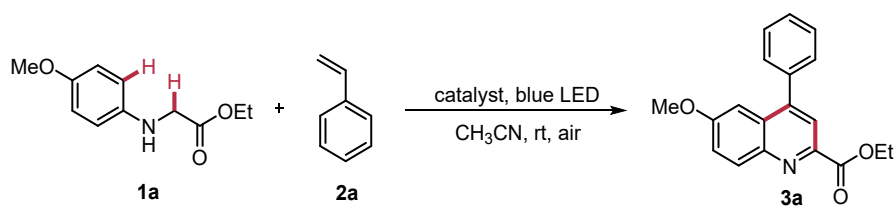

| Entry           | Catalyst             | Yield (%) <sup>b</sup> |
|-----------------|----------------------|------------------------|
| 1               | Ho(OTf) <sub>3</sub> | 58                     |
| 2               | Tm(OTf) <sub>3</sub> | 62                     |
| 3               | Gd(OTf) <sub>3</sub> | 80                     |
| 4               | Lu(OTf) <sub>3</sub> | 75                     |
| 5               | In(OTf) <sub>3</sub> | 37                     |
| 6               | Sn(OTf) <sub>2</sub> | NR                     |
| 7               | AgOTf                | 43                     |
| 8               | CeCl <sub>3</sub>    | 80                     |
| 9 <sup>c</sup>  | Ce(OTf) <sub>3</sub> | 71                     |
| 10 <sup>d</sup> | Ce(OTf) <sub>3</sub> | 68                     |

<sup>a</sup>Reaction conditions: **1a** (0.1 mmol), **2a** (0.5 mmol), catalyst (30 mol%), CH<sub>3</sub>CN (2 mL), blue LED light irradiation under air at room temperature. <sup>b</sup>Yields were determined by <sup>1</sup>H NMR analysis using 1,3,5-trimethoxybenzene as an internal standard. <sup>c</sup>15 mol% Ce(OTf)<sub>3</sub> was used. <sup>d</sup>40 mol% Ce(OTf)<sub>3</sub> was used.

**Table S3.** Screening of solvents <sup>a</sup>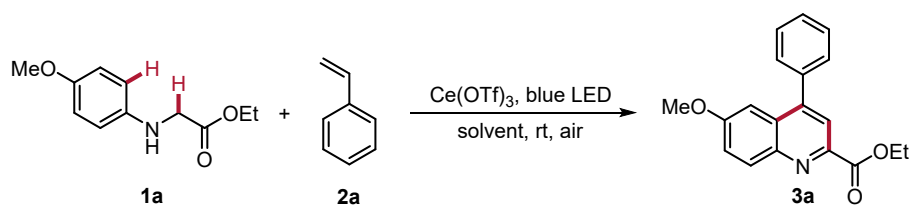

| Entry           | Solvent            | Yield (%) <sup>b</sup> |
|-----------------|--------------------|------------------------|
| 1               | CH <sub>3</sub> OH | trace                  |
| 2               | THF                | 82                     |
| 3               | DMF                | trace                  |
| 4               | DMSO               | trace                  |
| 5               | CHCl <sub>3</sub>  | 66                     |
| 6               | DCM                | 78                     |
| 7               | DCE                | 87                     |
| 8               | 1,4-Dioxane        | 53                     |
| 9               | Toluene            | 61                     |
| 10              | Et <sub>2</sub> O  | trace                  |
| 11              | EtOAc              | trace                  |
| 12 <sup>c</sup> | CH <sub>3</sub> CN | 75                     |
| 13 <sup>d</sup> | CH <sub>3</sub> CN | 86                     |

<sup>a</sup> Reaction conditions: **1a** (0.1 mmol), **2a** (0.5 mmol),  $\text{Ce}(\text{OTf})_3$  (30 mol%), solvent (2.0 mL), blue LED light irradiation under air at room temperature. <sup>b</sup> Yields were determined by <sup>1</sup>H NMR analysis using 1,3,5-trimethoxybenzene as an internal standard. <sup>c</sup> 1.0 mL CH<sub>3</sub>CN was used. <sup>d</sup> 0.5 mL CH<sub>3</sub>CN was used.



### 3. Mechanistic Investigation

#### 3.1 UV/Vis absorption spectra

The UV/Vis absorption spectra were recorded in 1 cm path quartz cuvettes by using a Varian Cary 300 Conc UV/Vis spectrometer. The concentrations of **1a** and  $\text{Ce}(\text{OTf})_3$  were 0.03 M and 0.015 M, respectively. The obtained bathochromic shift in UV/vis absorption spectra (partial spectrum) were shown in **Fig. S4**.

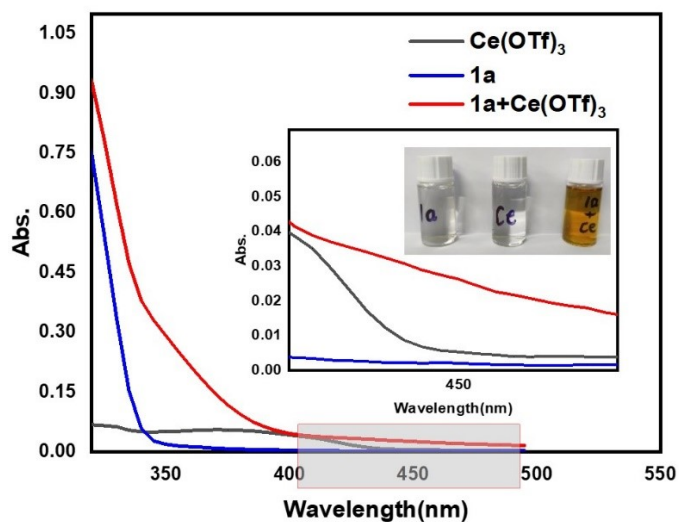

**Fig. S4.** The UV-Vis spectrum of **1a**,  $\text{Ce}(\text{OTf})_3$  and **1a** +  $\text{Ce}(\text{OTf})_3$  in  $\text{CH}_3\text{CN}$ .

### 3.2 Control experiments

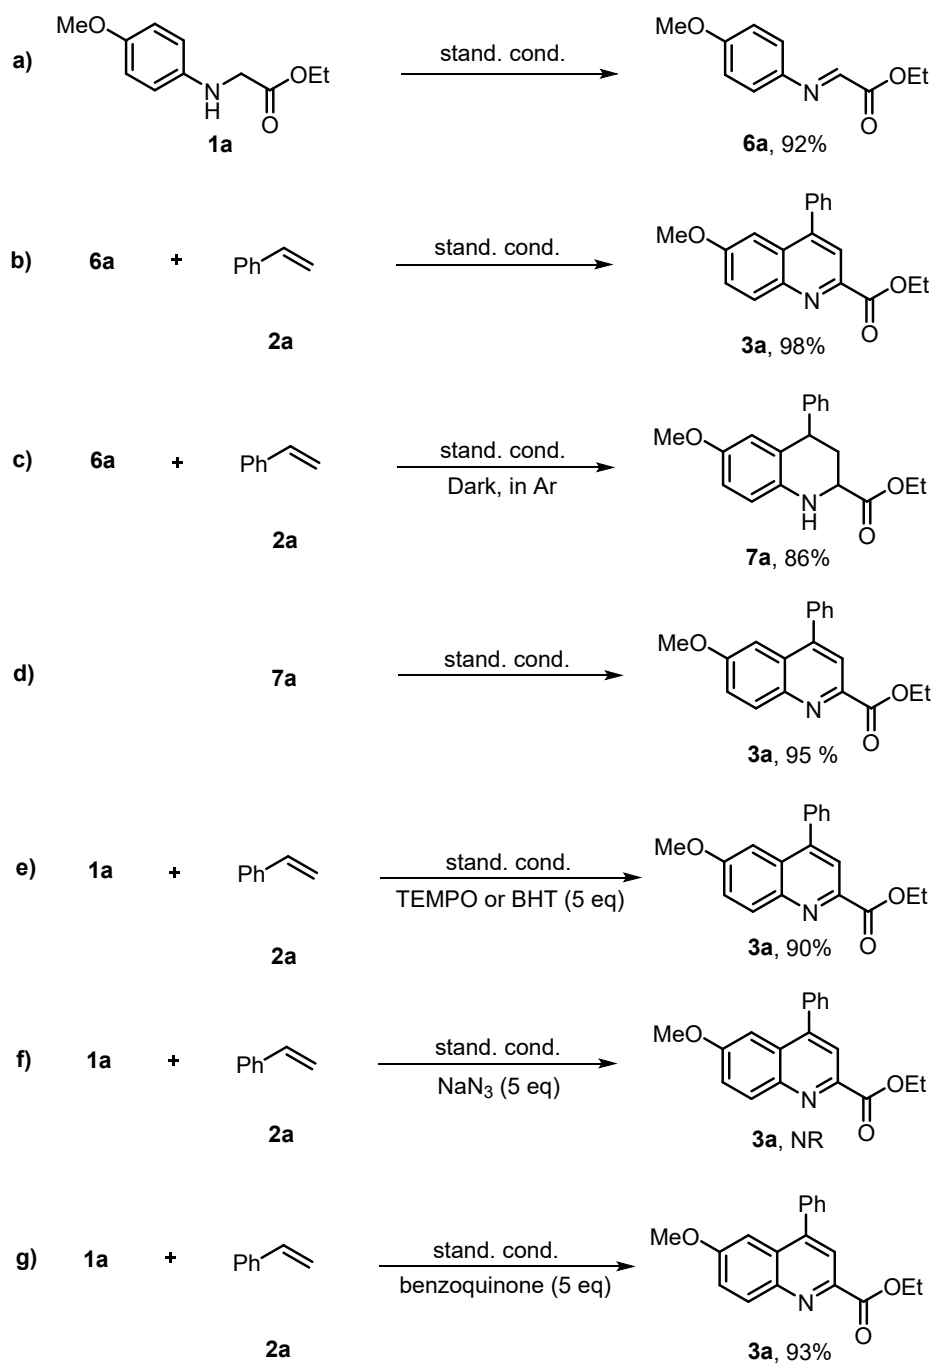

**Scheme S3** Control experiments.

### 3.3 EPR spectra

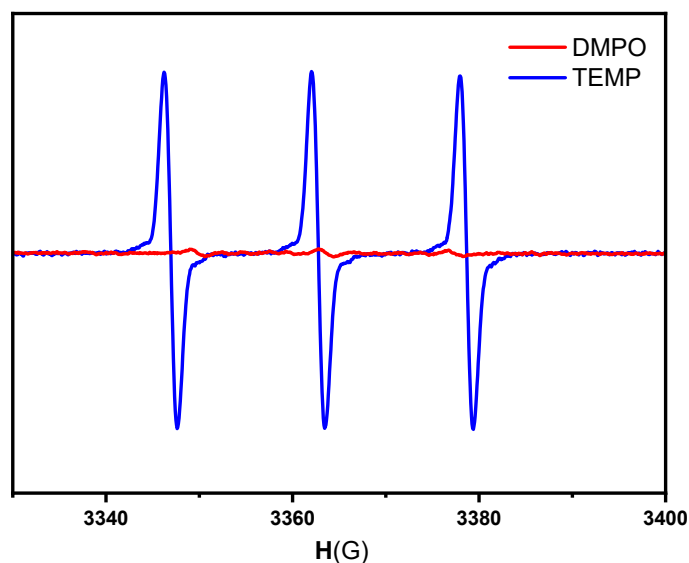

**Fig. S5.** EPR spectra of **1a** (0.05 mol/L), Ce(OTf)<sub>3</sub> (0.015 mol/L) and DMPO (red) or TEMP (blue) in air-saturated CH<sub>3</sub>CN upon irradiation with blue LED for 10 min.

### 3.4 Quantum yield determination

To a solution of **1a** (0.2 mmol, 1 eq) and Ce(OTf)<sub>3</sub> (30 mol%) in dry CH<sub>3</sub>CN (4.0 mL) were added **2a** (1.0 mmol, 5 eq). The mixed solution was irradiated with 30 W blue LED under air atmosphere at room temperature for 8 h. The yield of product **3a** was determined by <sup>1</sup>H NMR using 1,3,5-trimethoxybenzene as an internal standard. The quantum yield is calcd using the following equation:

$$\phi = \frac{n \text{ of } 3a}{flux * S * t}$$

Where,  $\Phi$  is quantum yield, S (m<sup>2</sup>) is the irradiation area and t (s) is the photoreaction time. Experiment: the unit photon flux was 357  $\mu\text{mol}\cdot\text{s}^{-1}\cdot\text{m}^{-2}$ , the irradiation area was  $1.66\times 10^{-3}$  m<sup>2</sup>, and the product yield was 41% after 8 h.

**Quantum yield: 0.0048**

### 3.5 Enantiomeric purity study of product 3o

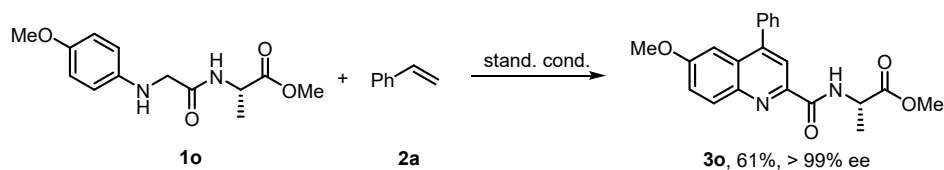

**Scheme S4** Enantiomeric purity study of product **3o**. The high ee value of product **3o** indicates that our reaction maintains the enantiomeric purity of the derived alanine.

#### Racemic product

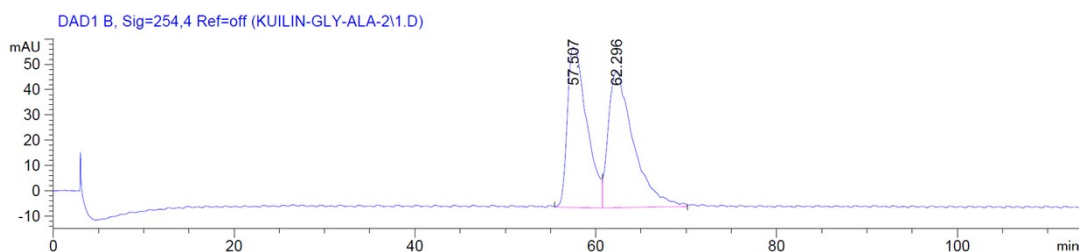

|   | Retention Time/min | Int Type | Width/min | Area/mAU   | Height/mAU | Area/%  |
|---|--------------------|----------|-----------|------------|------------|---------|
| 1 | 57.507             | MM       | 2.4880    | 9463.74609 | 63.39716   | 47.5469 |
| 2 | 62.296             | MM       | 3.2139    | 1.04403e4  | 54.14102   | 52.4531 |

#### Chiral product

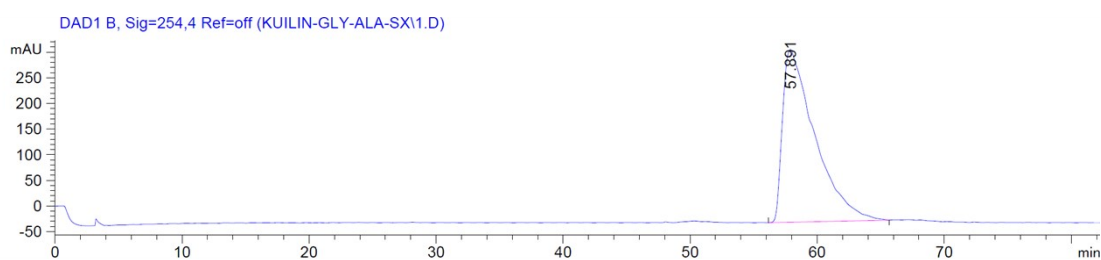

|   | Retention Time/min | Int Type | Width/min | Area/mAU  | Height/mAU | Area/%   |
|---|--------------------|----------|-----------|-----------|------------|----------|
| 1 | 57.891             | BB       | 2.3037    | 5.95935e4 | 336.89441  | 100.0000 |

## 4. Computational Study

### 4.1 Computational methods

All calculations were carried out with the Gaussian 09 D.01 programs.<sup>3</sup> Ground state geometry were fully optimized by using density functional theory (DFT)<sup>4</sup> and the B3LYP<sup>5</sup> method with the 6-31G\* basic set for C, H, O and N. For Ce atom, MWB28 basic set was used. Frequency calculations have been performed to verify the optimized structures as local minima and to obtain zero-point energy (ZPE) at 298 K. The 3D molecular structures were generated using the CYL-View.<sup>6</sup> Using this geometry, single point time dependent density functional theory (TD-DFT) calculation was then performed with the CAM-B3LYP/(6-31G\*, MWB28) level of theory. The effect of solvent is considered from Truhlar and co-workers' universal solvation model (SMD-CH<sub>3</sub>CN).<sup>7,8</sup> The first 10 excited states of the complex B is reported below.

### 4.2 Optimized structure and binding energy of 1a-Ce(III) complex

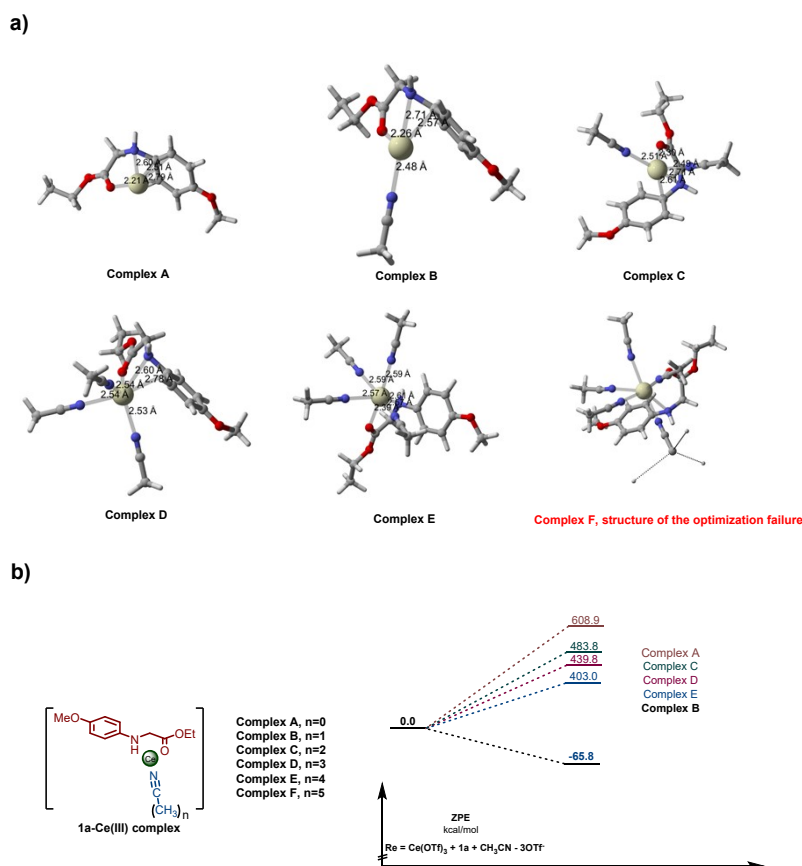

Fig. S6. a) Optimized structure and b) formation energy of 1a-Ce(III) complex.

The formation energy shows that only **complex B (5a)** with one CH<sub>3</sub>CN molecule coordination has a favorable formation energy is -65.8 kcal/mol. For complexes with

other quantities of CH<sub>3</sub>CN molecule coordination (0, 2, 3 and 4) have very unfavorable formation energies (608.9 kcal/mol, 483.8 kcal/mol, 439.8 kcal/mol and 403.0 kcal/mol). Therefore, we speculate that **complex B (5a)** may be the structure of **1a**-Ce(III) complex.

#### 4.3 UV-Vis spectra predicted by TD-DFT of 1a-Ce(III) complex

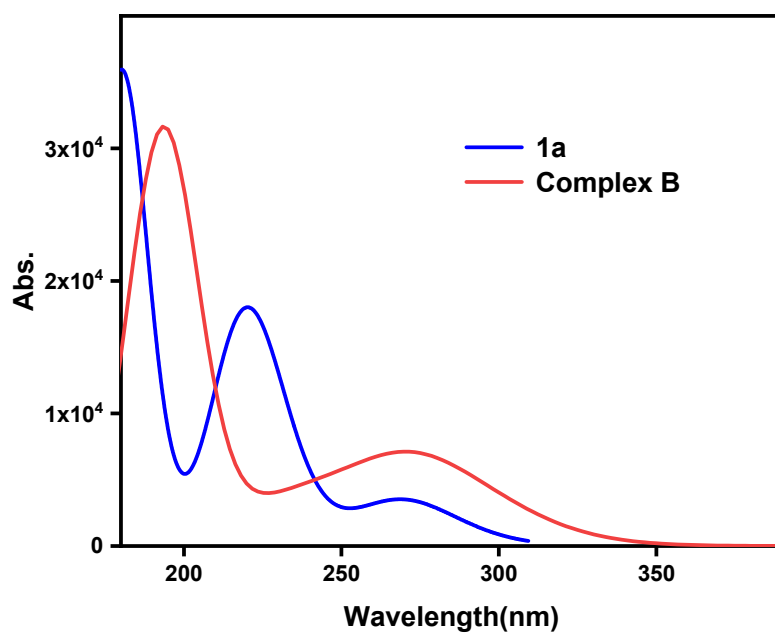

Fig. S7. UV-Vis absorption spectra predicted by TD-DFT.

#### 4.4 Mulliken spin population analysis

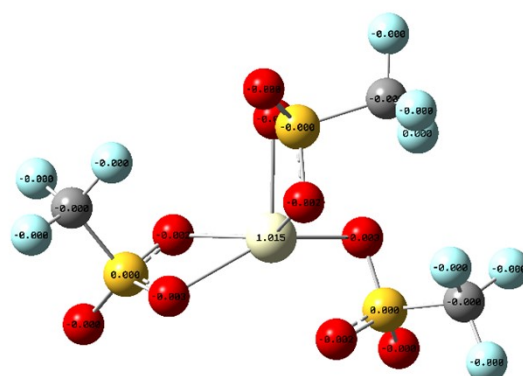

Fig. S8. Mulliken spin population analysis of Ce(OTf)<sub>3</sub>: Ce=1.015.

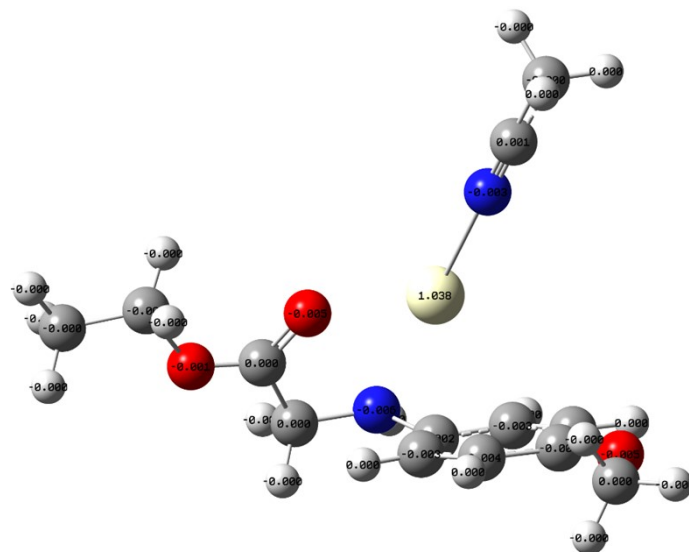

**Fig. S9.** Mulliken spin population analysis of complex B: Ce=1.038.

#### 4.5 Excited state of Complex B

##### Complex B

Excited State 1: 2.001-A 0.2281 eV 5436.33 nm f=0.0000  $\langle S^2 \rangle = 0.751$

|            |          |
|------------|----------|
| 80A -> 82A | -0.15459 |
| 80A -> 83A | 0.13349  |
| 80A -> 87A | -0.20460 |
| 80A -> 88A | -0.29170 |
| 80A -> 89A | -0.70555 |
| 80A -> 90A | 0.90412  |
| 80A <- 87A | -0.12344 |
| 80A <- 88A | -0.17105 |
| 80A <- 89A | -0.41058 |
| 80A <- 90A | 0.53746  |

This state for optimization and/or second-order correction.

Total Energy, E(TD-HF/TD-DFT) = -1315.79091250

Copying the excited state density for this state as the 1-particle RhoCI density.

Excited State 2: 2.001-A 0.2550 eV 4862.30 nm f=0.0000  
<S\*\*2>=0.751

80A -> 82A 0.25183

80A -> 83A 0.21106

80A -> 85A 0.27470

80A -> 86A 0.18890

80A -> 88A -0.10495

80A -> 89A -0.62074

80A -> 90A -0.52942

80A -> 91A 0.68683

80A <- 82A 0.13692

80A <- 83A 0.10110

80A <- 85A 0.10492

80A <- 86A 0.13002

80A <- 89A -0.33191

80A <- 90A -0.29375

80A <- 91A 0.38241

Excited State 3: 2.001-A 0.3345 eV 3706.41 nm f=0.0000  
<S\*\*2>=0.751

80A -> 83A -0.27781

80A -> 84A -0.15518

80A -> 85A 0.14013



|            |          |
|------------|----------|
| 80A -> 86A | 0.21675  |
| 80A -> 87A | 0.23960  |
| 80A -> 88A | 0.66728  |
| 80A -> 89A | -0.46845 |
| 80A -> 91A | -0.35734 |
| 80A -> 93A | -0.46999 |
| 80A <- 87A | 0.10721  |
| 80A <- 88A | 0.33336  |
| 80A <- 89A | -0.23908 |
| 80A <- 91A | -0.18617 |
| 80A <- 93A | -0.21181 |

Excited State 4: 2.001-A 0.6678 eV 1856.71 nm f=0.0000  
<S\*\*2>=0.751

|            |          |            |         |
|------------|----------|------------|---------|
| 80A -> 84A | 0.36250  | 80A -> 85A | 0.84949 |
| 80A -> 86A | -0.22799 |            |         |
| 80A -> 87A | -0.21548 |            |         |
| 80A -> 89A | 0.11216  |            |         |
| 80A -> 92A | 0.10732  |            |         |
| 80A <- 85A | -0.12735 |            |         |

Excited State 5: 2.001-A 0.6840 eV 1812.55 nm f=0.0000  
<S\*\*2>=0.751

|            |          |
|------------|----------|
| 80A -> 82A | 0.30675  |
| 80A -> 83A | -0.20094 |

|            |          |
|------------|----------|
| 80A -> 84A | 0.56264  |
| 80A -> 85A | -0.31245 |
| 80A -> 86A | 0.35679  |
| 80A -> 87A | -0.50964 |
| 80A -> 88A | 0.16394  |
| 80A -> 92A | 0.15515  |

Excited State 6: 2.000-A 0.7438 eV 1666.87 nm f=0.0000  
<S\*\*2>=0.750

|            |          |
|------------|----------|
| 80A -> 82A | -0.10017 |
| 80A -> 83A | -0.54989 |
| 80A -> 84A | -0.26387 |
| 80A -> 85A | 0.19567  |
| 80A -> 86A | 0.55575  |
| 80A -> 88A | -0.37142 |
| 80A -> 89A | 0.21510  |
| 80A -> 90A | 0.13013  |
| 80A -> 91A | 0.21576  |
| 80A -> 93A | -0.13623 |

Excited State 7: 3.460-A 3.1641 eV 391.84 nm f=0.0000  
<S\*\*2>=2.743

|            |          |
|------------|----------|
| 79A -> 82A | -0.25997 |
| 81A -> 83A | 0.49132  |
| 81A -> 84A | 0.20129  |

|            |          |
|------------|----------|
| 81A -> 86A | 0.12359  |
| 81A -> 88A | -0.23018 |
| 81A -> 91A | -0.10030 |
| 81A -> 93A | -0.20719 |
| 79B -> 81B | 0.26829  |
| 80B -> 82B | -0.46811 |
| 80B -> 83B | -0.26125 |
| 80B -> 84B | 0.13617  |
| 80B -> 85B | 0.18829  |
| 80B -> 92B | -0.16172 |

Excited State 8: 3.452-A 3.2792 eV 378.09 nm f=0.0000  
<S\*\*2>=2.730

|            |          |
|------------|----------|
| 81A -> 82A | 0.68533  |
| 81A -> 92A | -0.14900 |
| 80B -> 81B | -0.66929 |

Excited State 9: 2.037-A 4.1219 eV 300.79 nm f=0.0232 80A ->  
82A 0.53062

|            |          |
|------------|----------|
| 80A -> 83A | -0.10036 |
| 80A -> 84A | -0.19773 |
| 80A -> 86A | -0.15746 |
| 80A -> 90A | 0.16499  |
| 80A -> 92A | 0.18013  |
| 80A -> 94A | 0.12216  |

|            |          |
|------------|----------|
| 80A -> 96A | -0.14386 |
| 80A -> 97A | 0.18241  |
| 81A -> 82A | -0.47374 |
| 80B -> 81B | -0.47443 |

Excited State 10: 2.029-A 4.1964 eV 295.45 nm f=0.0257  
<S\*\*2>=0.779

|            |          |
|------------|----------|
| 80A -> 82A | 0.50445  |
| 80A -> 83A | -0.15815 |
| 80A -> 84A | -0.17913 |
| 80A -> 86A | -0.21724 |
| 80A -> 90A | 0.12940  |
| 80A -> 92A | 0.17757  |
| 80A -> 94A | 0.11575  |
| 80A -> 96A | -0.12681 |
| 80A -> 97A | 0.17207  |
| 81A -> 82A | 0.47589  |
| 80B -> 81B | 0.47676  |

#### 4.6 The Cartesian coordinates of 1a-Ce(III) complex

##### Complex A

3 2

|   |             |             |             |
|---|-------------|-------------|-------------|
| C | 3.18148100  | 0.63565100  | 0.21631600  |
| C | 3.03876400  | -0.63726700 | 0.86330100  |
| C | 1.84601400  | -0.99747300 | 1.47986500  |
| C | 0.72165400  | -0.11767500 | 1.47771800  |
| C | 0.84348900  | 1.12530300  | 0.82102200  |
| C | 2.03496800  | 1.48652100  | 0.16887100  |
| H | 3.90626200  | -1.29273400 | 0.90346400  |
| H | 1.78861900  | -1.95778400 | 1.99548000  |
| H | 0.02160500  | 1.83671400  | 0.80624500  |
| H | 2.09781400  | 2.46221100  | -0.30362400 |
| N | -0.55856700 | -0.73131400 | 1.69433600  |
| H | -0.51367800 | -1.46987100 | 2.40055100  |
| O | 4.35658300  | 0.89810100  | -0.27088100 |
| C | 4.71409800  | 2.19501800  | -0.85955300 |
| H | 5.77191900  | 2.10067500  | -1.09633000 |
| H | 4.13093800  | 2.35713300  | -1.76966200 |
| H | 4.55428000  | 2.98386900  | -0.12073500 |
| C | -1.80044800 | 0.06693700  | 1.84724000  |
| H | -1.63295600 | 1.01120300  | 2.38131500  |
| H | -2.51448700 | -0.50558800 | 2.44939000  |
| C | -2.42841400 | 0.34538800  | 0.48441500  |

|    |             |             |             |
|----|-------------|-------------|-------------|
| O  | -1.77745400 | -0.02053200 | -0.57333800 |
| O  | -3.54079000 | 0.92105500  | 0.48885200  |
| C  | -4.40656000 | 1.28980300  | -0.75635500 |
| H  | -4.17715100 | 2.34944000  | -0.87892500 |
| H  | -4.00743100 | 0.69516800  | -1.57794100 |
| C  | -5.83914000 | 1.00939700  | -0.39771800 |
| H  | -6.16158200 | 1.58669800  | 0.47246300  |
| H  | -6.44716800 | 1.33106000  | -1.25350500 |
| H  | -6.02802500 | -0.05494300 | -0.23586800 |
| Ce | 0.16170400  | -1.05366700 | -0.78035300 |

### Complex B

3 2

|   |             |             |             |
|---|-------------|-------------|-------------|
| C | 2.67313300  | -1.69360900 | 0.53522000  |
| C | 2.55535600  | -1.75145200 | -0.88802300 |
| C | 1.31179400  | -1.87994700 | -1.49863400 |
| C | 0.11664000  | -1.94564200 | -0.72573500 |
| C | 0.22430200  | -1.85209300 | 0.67526700  |
| C | 1.47545200  | -1.70774600 | 1.30018900  |
| H | 3.46729300  | -1.74732800 | -1.47999500 |
| H | 1.26391800  | -1.96565300 | -2.58526500 |
| H | -0.65535700 | -1.90723400 | 1.31030900  |
| H | 1.51659000  | -1.67488700 | 2.38401700  |
| N | -1.10153400 | -1.65975700 | -1.41525100 |

|    |             |             |             |
|----|-------------|-------------|-------------|
| H  | -1.12365700 | -2.07320300 | -2.34842600 |
| O  | 3.89218900  | -1.63734800 | 1.00840500  |
| C  | 4.17417300  | -1.72993600 | 2.43738800  |
| H  | 5.26031700  | -1.73616800 | 2.50341900  |
| H  | 3.76710700  | -0.85738200 | 2.95597400  |
| H  | 3.76491700  | -2.66250000 | 2.83416600  |
| C  | -2.41511300 | -1.77618700 | -0.75100700 |
| H  | -2.47751900 | -2.63447600 | -0.06918100 |
| H  | -3.18239200 | -1.93708100 | -1.51574200 |
| C  | -2.75915300 | -0.49715700 | 0.00650400  |
| O  | -1.89502800 | 0.44636500  | 0.08495300  |
| O  | -3.91102700 | -0.46516500 | 0.52203000  |
| C  | -4.47346800 | 0.73029400  | 1.30905900  |
| H  | -3.85505300 | 0.78124500  | 2.20713400  |
| H  | -4.30229400 | 1.59767800  | 0.66942600  |
| C  | -5.92439300 | 0.43447000  | 1.57663600  |
| H  | -6.05037600 | -0.46863900 | 2.17924800  |
| H  | -6.33195700 | 1.27842700  | 2.14599000  |
| H  | -6.49899700 | 0.34600400  | 0.65107700  |
| Ce | 0.19438900  | 0.62372400  | -0.75525200 |
| C  | 2.63374300  | 4.92205600  | 0.48724900  |
| H  | 2.84552100  | 4.96313000  | 1.56352200  |
| H  | 3.57819400  | 4.96339100  | -0.07078400 |
| H  | 2.01367600  | 5.78451200  | 0.20932200  |

|   |            |            |             |
|---|------------|------------|-------------|
| C | 1.93281100 | 3.69630600 | 0.17229200  |
| N | 1.37078500 | 2.70650100 | -0.08204800 |

**Complex C**

3 2

|   |             |             |             |
|---|-------------|-------------|-------------|
| C | 3.03319000  | 1.67937000  | 0.55199200  |
| C | 2.83223000  | 0.73029000  | 1.59458600  |
| C | 1.57100300  | 0.53475400  | 2.14924300  |
| C | 0.44632200  | 1.26822600  | 1.68260400  |
| C | 0.63325400  | 2.17502500  | 0.62377800  |
| C | 1.90344700  | 2.37921800  | 0.06199300  |
| H | 3.69884700  | 0.20341900  | 1.98415100  |
| H | 1.46167600  | -0.15907900 | 2.98283300  |
| H | -0.19414500 | 2.76336600  | 0.23750200  |
| H | 2.01358800  | 3.11891500  | -0.72342500 |
| N | -0.84477100 | 0.77373400  | 2.05474200  |
| H | -0.86124000 | 0.44199500  | 3.01840500  |
| O | 4.27385000  | 1.82362500  | 0.13577600  |
| C | 4.63793700  | 2.86341600  | -0.81118000 |
| H | 5.71945400  | 2.78806100  | -0.90607900 |
| H | 4.16142500  | 2.67833400  | -1.77855900 |
| H | 4.36259600  | 3.84412400  | -0.41380400 |
| C | -2.07473300 | 1.51080200  | 1.72399300  |
| H | -1.95714800 | 2.60031900  | 1.78646800  |



|    |             |             |             |
|----|-------------|-------------|-------------|
| H  | -2.85192000 | 1.24606200  | 2.44825400  |
| C  | -2.57509600 | 1.13295500  | 0.33347100  |
| O  | -1.89989300 | 0.34248400  | -0.39848900 |
| O  | -3.67811100 | 1.66726900  | -0.00018400 |
| C  | -4.35418800 | 1.40639500  | -1.33748100 |
| H  | -3.64788000 | 1.75903900  | -2.09166400 |
| H  | -4.46796500 | 0.32251800  | -1.39990600 |
| C  | -5.66019000 | 2.15821800  | -1.32575300 |
| H  | -5.50548500 | 3.23516600  | -1.22035200 |
| H  | -6.15832100 | 1.98068600  | -2.28562300 |
| H  | -6.32274400 | 1.80368600  | -0.53191200 |
| Ce | 0.11816900  | -0.69349300 | -0.01316600 |
| C  | -0.49776700 | -5.28957600 | 2.12162300  |
| H  | -1.45059800 | -5.71742400 | 1.78567600  |
| H  | -0.49624000 | -5.22895200 | 3.21704500  |
| H  | 0.32409500  | -5.93932700 | 1.79590100  |
| C  | -0.32926700 | -3.96625600 | 1.55608600  |
| N  | -0.19355300 | -2.90231400 | 1.10224700  |
| C  | 1.45379600  | -2.11677700 | -4.75148100 |
| H  | 1.44817400  | -1.26000800 | -5.43636300 |
| H  | 2.45558600  | -2.56358600 | -4.74070500 |
| H  | 0.73048700  | -2.86279900 | -5.10303700 |
| C  | 1.09726700  | -1.68023700 | -3.41609600 |
| N  | 0.81175000  | -1.33054300 | -2.34303100 |

## Complex D

3 2

|   |             |             |             |
|---|-------------|-------------|-------------|
| C | -3.89703700 | 0.33124900  | -0.27455200 |
| C | -3.28119600 | -0.64107200 | -1.09929200 |
| C | -2.02786100 | -0.40892600 | -1.65014200 |
| C | -1.34354600 | 0.80451100  | -1.39176200 |
| C | -1.93092700 | 1.74928300  | -0.53575200 |
| C | -3.19746900 | 1.52209100  | 0.00817600  |
| H | -3.83458200 | -1.54517200 | -1.33232800 |
| H | -1.62187200 | -1.12681800 | -2.36275600 |
| H | -1.44795100 | 2.69829400  | -0.32417500 |
| H | -3.64356300 | 2.28944900  | 0.62993600  |
| N | -0.01964700 | 0.95067700  | -1.96985200 |
| H | -0.01608600 | 0.58725300  | -2.92336900 |
| O | -5.10926000 | 0.02451000  | 0.17269700  |
| C | -5.90288300 | 1.00809400  | 0.87328800  |
| H | -6.86254700 | 0.52556400  | 1.05035000  |
| H | -5.43638100 | 1.27196800  | 1.82806500  |
| H | -6.04252800 | 1.89722400  | 0.25135800  |
| C | 0.62726700  | 2.27668800  | -1.94526900 |
| H | -0.06791700 | 3.09992700  | -2.14598800 |
| H | 1.38908500  | 2.30987900  | -2.73250500 |
| C | 1.32723900  | 2.49258500  | -0.61256900 |

|    |             |             |             |
|----|-------------|-------------|-------------|
| O  | 1.43548500  | 1.53744800  | 0.20786000  |
| O  | 1.78321400  | 3.67053200  | -0.43105200 |
| C  | 2.55762500  | 4.04970500  | 0.80981200  |
| H  | 1.88052500  | 3.87276200  | 1.64801600  |
| H  | 3.40095900  | 3.35783000  | 0.85683900  |
| C  | 2.96595200  | 5.49332800  | 0.65405700  |
| H  | 2.09647500  | 6.15095600  | 0.57282900  |
| H  | 3.52921600  | 5.78578600  | 1.54704400  |
| H  | 3.61270800  | 5.63657900  | -0.21554600 |
| Ce | 0.58045700  | -0.63363400 | 0.00262400  |
| C  | 1.52762900  | -4.38122000 | -3.39935500 |
| H  | 2.56395300  | -4.30391600 | -3.74911100 |
| H  | 0.85307200  | -4.33227700 | -4.26242700 |
| H  | 1.38966000  | -5.34286400 | -2.89090300 |
| C  | 1.23549700  | -3.29462500 | -2.48239600 |
| N  | 0.99932200  | -2.42290200 | -1.74948900 |
| C  | -2.17872400 | -2.31711700 | 3.99762700  |
| H  | -2.29175500 | -1.53209400 | 4.75456400  |
| H  | -3.17070500 | -2.65638200 | 3.67714900  |
| H  | -1.63583100 | -3.16255300 | 4.43638500  |
| C  | -1.44382000 | -1.79944600 | 2.85806300  |
| N  | -0.85506200 | -1.38545800 | 1.94516800  |
| C  | 4.87975800  | -2.26183700 | 2.33387900  |
| H  | 5.04870700  | -1.66107800 | 3.23523200  |

|   |            |             |            |
|---|------------|-------------|------------|
| H | 5.73619700 | -2.14581700 | 1.65935400 |
| H | 4.78602100 | -3.31660800 | 2.61760000 |
| C | 3.66674600 | -1.82085000 | 1.66946900 |
| N | 2.69504200 | -1.46827000 | 1.13795500 |

### Complex E

3 2

|   |             |             |             |
|---|-------------|-------------|-------------|
| C | 4.06068400  | -0.18174500 | -0.67930100 |
| C | 3.28715800  | 0.78835100  | -1.35501700 |
| C | 1.99623000  | 0.49360000  | -1.77219900 |
| C | 1.43369500  | -0.77991500 | -1.52198600 |
| C | 2.18399300  | -1.72914400 | -0.81284900 |
| C | 3.48635200  | -1.43880800 | -0.40479200 |
| H | 3.74513800  | 1.74468300  | -1.58476500 |
| H | 1.45952100  | 1.22041500  | -2.38334300 |
| H | 1.79390900  | -2.72189900 | -0.61180300 |
| H | 4.05747600  | -2.20645900 | 0.10398000  |
| N | 0.07614000  | -0.99951800 | -1.98407100 |
| H | -0.03571100 | -0.61425000 | -2.92194700 |
| O | 5.29782200  | 0.18903800  | -0.35165500 |
| C | 6.23094600  | -0.77794900 | 0.17038400  |
| H | 7.17261000  | -0.24102500 | 0.27300200  |
| H | 5.90472700  | -1.14456300 | 1.14965100  |
| H | 6.35262700  | -1.61015400 | -0.52971100 |

|    |             |             |             |
|----|-------------|-------------|-------------|
| C  | -0.47092900 | -2.36695200 | -1.95111500 |
| H  | 0.25362800  | -3.12961900 | -2.25763200 |
| H  | -1.30698300 | -2.42440500 | -2.65692100 |
| C  | -1.01692100 | -2.68331400 | -0.56698300 |
| O  | -1.16492700 | -1.77263200 | 0.28480400  |
| O  | -1.31470800 | -3.91828400 | -0.38805900 |
| C  | -1.92516100 | -4.39513000 | 0.89824000  |
| H  | -1.21304700 | -4.13946000 | 1.68582500  |
| H  | -2.84385000 | -3.81954900 | 1.03038000  |
| C  | -2.16013500 | -5.87964600 | 0.75713200  |
| H  | -1.22394500 | -6.42011900 | 0.59365000  |
| H  | -2.60644000 | -6.24784300 | 1.68709700  |
| H  | -2.85138200 | -6.09991800 | -0.06071700 |
| Ce | -0.57819300 | 0.53314600  | 0.03094600  |
| C  | 0.27896100  | 5.59250700  | -0.86173500 |
| H  | 0.31840000  | 5.80320700  | -1.93645300 |
| H  | 1.22925800  | 5.88945200  | -0.40399700 |
| H  | -0.53240000 | 6.17580300  | -0.41206300 |
| C  | 0.04744800  | 4.17396000  | -0.64404400 |
| N  | -0.13568300 | 3.04007600  | -0.47205900 |
| C  | -4.10361800 | 1.49698300  | 3.70188100  |
| H  | -3.89500800 | 0.87225200  | 4.57762300  |
| H  | -4.07140900 | 2.55152800  | 3.99794100  |
| H  | -5.10513600 | 1.26106400  | 3.32517000  |

|   |             |             |             |
|---|-------------|-------------|-------------|
| C | -3.11394100 | 1.24358300  | 2.66786300  |
| N | -2.32333400 | 1.04167800  | 1.84223000  |
| C | -4.64650800 | 1.55492800  | -3.04831300 |
| H | -5.37784400 | 0.74052800  | -2.99583700 |
| H | -4.33394400 | 1.68819700  | -4.09016500 |
| H | -5.11596400 | 2.47987900  | -2.69519300 |
| C | -3.49313200 | 1.23849200  | -2.22101600 |
| N | -2.57109100 | 0.98385900  | -1.56255800 |
| C | 2.57315000  | 0.87285800  | 4.13354900  |
| H | 2.09346900  | 1.52524400  | 4.87172100  |
| H | 3.53798200  | 1.30667000  | 3.84836400  |
| H | 2.73976400  | -0.11245100 | 4.58300000  |
| C | 1.72293800  | 0.74440400  | 2.96131600  |
| N | 1.04211400  | 0.64289800  | 2.02666900  |

## 5. Product Data

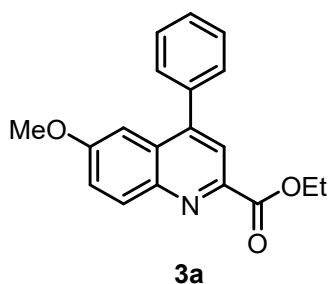

**Ethyl 6-methoxy-4-phenylquinoline-2-carboxylate (3a).**<sup>9</sup> Purified by flash column chromatography (silica gel, petroleum ether/EtOAc = 8/1 to 4/1 as eluent). White solid, 92% yield. <sup>1</sup>H NMR (400 MHz, CDCl<sub>3</sub>) δ 8.28 (d, *J* = 9.3 Hz, 1H), 8.10 (s, 1H), 7.61-7.47 (m, 5H), 7.44 (dd, *J* = 9.3, 2.8 Hz, 1H), 7.22 (d, *J* = 2.7 Hz, 1H), 4.56 (q, *J* = 7.1 Hz, 2H), 3.81 (s, 3H), 1.49 (t, *J* = 7.1 Hz, 3H); <sup>13</sup>C NMR (101 MHz, CDCl<sub>3</sub>) δ 165.6, 159.5, 148.0, 145.4, 144.3, 137.9, 132.7, 129.3, 129.2, 128.8, 128.6, 122.8, 121.8, 103.3, 62.1, 55.5, 14.4.

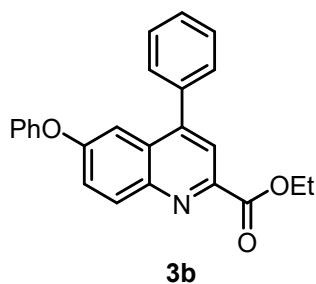

**Ethyl 6-phenoxy-4-phenylquinoline-2-carboxylate (3b).** Purified by flash column chromatography (silica gel, petroleum ether/EtOAc = 8/1 to 4/1 as eluent). White solid, 90% yield. <sup>1</sup>H NMR (400 MHz, CDCl<sub>3</sub>) δ 8.33 (d, *J* = 9.0 Hz, 1H), 8.11 (s, 1H), 7.54-7.38 (m, 7H), 7.36-7.28 (m, 2H), 7.15-7.05 (m, 1H), 7.05-6.93 (m, 2H), 4.54 (q, *J* = 7.1 Hz, 2H), 1.46 (t, *J* = 7.1 Hz, 3H); <sup>13</sup>C NMR (101 MHz, CDCl<sub>3</sub>) δ 165.4, 157.2, 156.0, 148.6, 146.5, 145.0, 137.3, 133.1, 129.9, 129.3, 128.9, 128.7, 128.7, 124.2, 123.2, 121.7, 119.4, 111.4, 62.2, 14.4. HRMS (ESI) calcd for C<sub>24</sub>H<sub>20</sub>NO<sub>3</sub> (M+H<sup>+</sup>) 370.1438, found 370.1434.

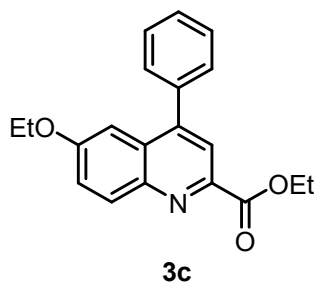

**Ethyl 6-ethoxy-4-phenylquinoline-2-carboxylate (3c).**<sup>10</sup> Purified by flash column chromatography (silica gel, petroleum ether/EtOAc = 8/1 to 4/1 as eluent). White solid, 81% yield. <sup>1</sup>H NMR (400 MHz, CDCl<sub>3</sub>) δ 8.27 (d, *J* = 9.3 Hz, 1H), 8.09 (s, 1H), 7.59-7.48 (m, 5H), 7.43 (dd, *J* = 9.3, 2.8 Hz, 1H), 7.20 (d, *J* = 2.8 Hz, 1H), 4.55 (q, *J* = 7.1 Hz, 2H), 4.01 (q, *J* = 7.0 Hz, 2H), 1.48 (t, *J* = 7.1 Hz, 3H), 1.42 (t, *J* = 7.0 Hz, 3H); <sup>13</sup>C NMR (101 MHz, CDCl<sub>3</sub>) δ 165.6, 158.8, 147.9, 145.2, 144.2, 137.9, 132.6, 129.3, 129.1, 128.7, 128.5, 122.9, 121.7, 103.9, 63.7, 62.0, 14.5, 14.3.

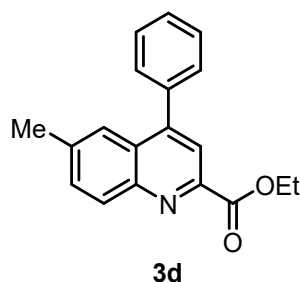

**Ethyl 6-methyl-4-phenylquinoline-2-carboxylate (3d).**<sup>9</sup> Purified by flash column chromatography (silica gel, petroleum ether/EtOAc = 8/1 to 4/1 as eluent). White solid, 80% yield. <sup>1</sup>H NMR (400 MHz, CDCl<sub>3</sub>) δ 8.26 (d, *J* = 8.7 Hz, 1H), 8.08 (s, 1H), 7.69 (s, 1H), 7.59 (dd, *J* = 8.8, 1.9 Hz, 1H), 7.56-7.45 (m, 5H), 4.54 (q, *J* = 7.1 Hz, 2H), 2.46 (s, 3H), 1.47 (t, *J* = 7.1 Hz, 3H); <sup>13</sup>C NMR (101 MHz, CDCl<sub>3</sub>) δ 165.6, 149.0, 147.0, 146.9, 139.0, 137.8, 132.4, 130.9, 129.6, 128.7, 128.6, 127.8, 124.4, 121.5, 62.2, 22.1, 14.5.

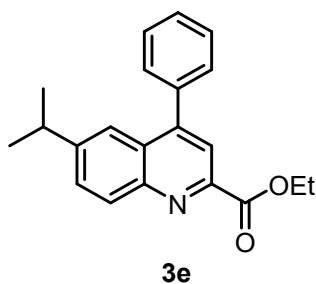

**Ethyl 6-isopropyl-4-phenylquinoline-2-carboxylate (3e).** Purified by flash column chromatography (silica gel, petroleum ether/EtOAc = 8/1 to 4/1 as eluent). White solid, 83% yield. <sup>1</sup>H NMR (400 MHz, CDCl<sub>3</sub>) δ 8.33 (d, *J* = 8.7 Hz, 1H), 8.12 (s, 1H), 7.77 (d, *J* = 2.0 Hz, 1H), 7.71 (dd, *J* = 8.8, 2.0 Hz, 1H), 7.58-7.46 (m, 5H), 4.56 (q, *J* = 7.1 Hz, 2H), 3.04 (p, *J* = 6.9 Hz, 1H), 1.48 (t, *J* = 7.1 Hz, 3H), 1.28 (d, *J* = 6.9 Hz, 6H); <sup>13</sup>C NMR (101 MHz, CDCl<sub>3</sub>) δ 165.44, 149.34, 149.01, 147.00, 146.79, 137.61, 130.95, 129.46, 129.36, 128.48, 128.44, 127.59, 121.67, 121.21, 61.97, 34.29, 23.53, 14.23. HRMS (ESI) calcd for C<sub>21</sub>H<sub>22</sub>NO<sub>2</sub> (M+H<sup>+</sup>) 320.1645, found 320.1643.



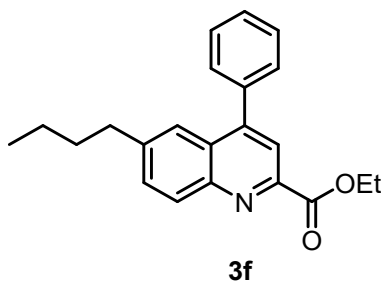

**Ethyl 6-butyl-4-phenylquinoline-2-carboxylate (3f).** Purified by flash column chromatography (silica gel, petroleum ether/EtOAc = 8/1 to 4/1 as eluent). White solid, 83% yield. <sup>1</sup>H NMR (400 MHz, CDCl<sub>3</sub>) δ 8.29 (d, *J* = 8.7 Hz, 1H), 8.10 (s, 1H), 7.70 (d, *J* = 1.9 Hz, 1H), 7.64 (dd, *J* = 8.7, 1.9 Hz, 1H), 7.58-7.49 (m, 5H), 4.56 (q, *J* = 7.1 Hz, 2H), 2.80–2.68 (m, 2H), 1.67–1.58 (m, 2H), 1.48 (t, *J* = 7.1 Hz, 3H), 1.40-1.31 (m, 2H), 0.91 (t, *J* = 7.3 Hz, 3H); <sup>13</sup>C NMR (101 MHz, CDCl<sub>3</sub>) δ 165.8, 149.2, 147.2, 147.0, 144.0, 138.0, 131.7, 131.1, 129.7, 128.8, 128.7, 127.9, 123.9, 121.5, 62.3, 36.1, 33.4, 22.5, 14.5, 14.0. HRMS (ESI) calcd for C<sub>22</sub>H<sub>24</sub>NO<sub>2</sub> (M+H<sup>+</sup>) 334.1802, found 334.1801.

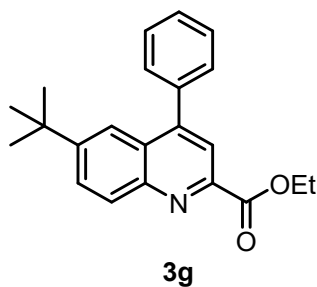

**Ethyl 6-(tert-butyl)-4-phenylquinoline-2-carboxylate (3g).** Purified by flash column chromatography (silica gel, petroleum ether/EtOAc = 8/1 to 4/1 as eluent). White solid, 81% yield. <sup>1</sup>H NMR (400 MHz, CDCl<sub>3</sub>) δ 8.32 (d, *J* = 8.9 Hz, 1H), 8.11 (s, 1H), 7.94–7.85 (m, 2H), 7.60–7.48 (m, 5H), 4.56 (q, *J* = 7.1 Hz, 2H), 1.48 (t, *J* = 7.1 Hz, 3H), 1.34 (s, 9H); <sup>13</sup>C NMR (101 MHz, CDCl<sub>3</sub>) δ 165.8, 151.8, 149.6, 147.2, 146.9, 137.9, 130.8, 129.7, 129.1, 128.8, 127.5, 121.5, 120.6, 62.3, 35.4, 31.1, 14.5. HRMS (ESI) calcd for C<sub>22</sub>H<sub>24</sub>NO<sub>2</sub> (M+H<sup>+</sup>) 334.1802, found 334.1800.

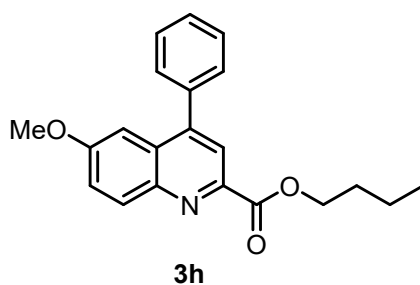

**Benzyl 6-methoxy-4-phenylquinoline-2-carboxylate (3h).**<sup>11</sup> Purified by flash column chromatography (silica gel, petroleum ether/EtOAc = 8/1 to 4/1 as eluent). White solid,

97% yield.  $^1\text{H}$  NMR (400 MHz,  $\text{CDCl}_3$ )  $\delta$  8.28 (d,  $J = 9.2$  Hz, 1H), 8.07 (s, 1H), 7.58 – 7.47 (m, 5H), 7.43 (ddd,  $J = 9.3, 2.9, 1.3$  Hz, 1H), 7.21 (d,  $J = 2.7$  Hz, 1H), 4.48 (t,  $J = 6.9$  Hz, 2H), 3.79 (s, 3H), 1.90-1.77 (m, 2H), 1.56-1.42 (m, 2H), 0.98 (t,  $J = 7.4$  Hz, 3H);  $^{13}\text{C}$  NMR (101 MHz,  $\text{CDCl}_3$ )  $\delta$  165.5, 159.4, 147.9, 145.2, 144.2, 137.8, 132.6, 129.2, 129.0, 128.7, 128.5, 122.7, 121.6, 103.1, 65.8, 55.4, 30.6, 19.1, 13.7.

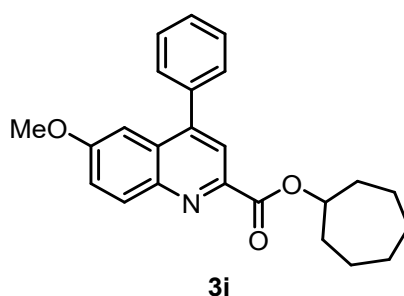

**Cycloheptyl 6-methoxy-4-phenylquinoline-2-carboxylate (3i).** Purified by flash column chromatography (silica gel, petroleum ether/EtOAc = 8/1 to 4/1 as eluent). Colorless oily liquid, 90% yield.  $^1\text{H}$  NMR (400 MHz,  $\text{CDCl}_3$ )  $\delta$  8.27 (d,  $J = 9.3$  Hz, 1H), 8.02 (s, 1H), 7.58-7.47 (m, 5H), 7.41 (dd,  $J = 9.3, 2.8$  Hz, 1H), 7.18 (d,  $J = 2.8$  Hz, 1H), 5.33-5.27 (m, 1H), 3.79 (s, 3H), 2.15-2.07 (m, 2H), 1.94-1.85 (m, 2H), 1.79-1.69 (m, 2H), 1.66-1.46 (m, 6H);  $^{13}\text{C}$  NMR (101 MHz,  $\text{CDCl}_3$ )  $\delta$  164.8, 159.5, 148.0, 146.0, 144.5, 138.2, 133.0, 129.4, 129.1, 128.9, 128.7, 122.7, 121.8, 103.3, 77.2, 55.6, 33.9, 28.3, 23.1. HRMS (ESI) calcd for  $\text{C}_{24}\text{H}_{26}\text{NO}_3$  ( $\text{M}+\text{H}^+$ ) 376.1907, found 376.1907.

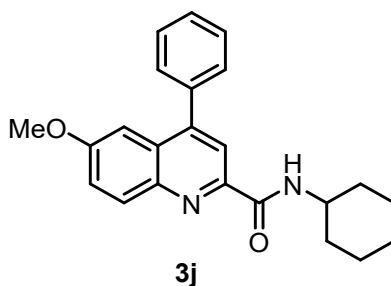

**N-cyclohexyl-6-methoxy-4-phenylquinoline-2-carboxamide (3j).** Purified by flash column chromatography (silica gel, petroleum ether/EtOAc = 8/1 to 4/1 as eluent). White solid, 86% yield.  $^1\text{H}$  NMR (400 MHz,  $\text{CDCl}_3$ )  $\delta$  8.21 (s, 1H), 8.15 (d,  $J = 8.6$  Hz, 1H), 8.07 (d,  $J = 9.2$  Hz, 1H), 7.58-7.45 (m, 5H), 7.41 (dd,  $J = 9.2, 2.8$  Hz, 1H), 7.23 (d,  $J = 2.8$  Hz, 1H), 4.14-3.95 (m, 1H), 3.80 (s, 3H), 2.13-2.03 (m, 2H), 1.84-1.78 (m, 2H), 1.74-1.64 (m, 1H), 1.54-1.34 (m, 4H), 1.33-1.24 (m, 1H);  $^{13}\text{C}$  NMR (101 MHz,  $\text{CDCl}_3$ )  $\delta$  163.9, 159.0, 148.4, 147.6, 143.3, 138.3, 131.7, 129.5, 129.0, 128.8, 128.6,

122.7, 119.7, 103.7, 55.6, 48.4, 33.3, 25.8, 25.1. HRMS (ESI) calcd for C<sub>23</sub>H<sub>25</sub>N<sub>2</sub>O<sub>2</sub> (M+H<sup>+</sup>) 361.1911, found 361.1907.

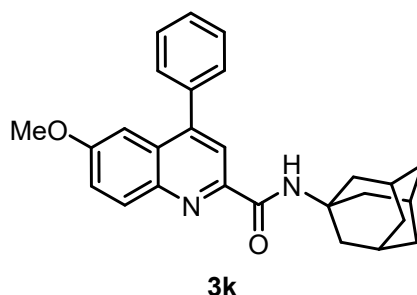

*N*-((3*s*,5*s*,7*s*)-adamantan-1-yl)-6-methoxy-4-phenylquinoline-2-carboxamide (**3k**).

Purified by flash column chromatography (silica gel, petroleum ether/EtOAc = 8/1 to 4/1 as eluent). White solid, 30% yield. <sup>1</sup>H NMR (400 MHz, CDCl<sub>3</sub>) δ 8.19 (s, 1H), 8.09 (s, 1H), 8.05 (d, *J* = 9.2 Hz, 1H), 7.55-7.46 (m, 5H), 7.40 (dd, *J* = 9.3, 2.8 Hz, 1H), 7.23 (d, *J* = 2.8 Hz, 1H), 3.80 (s, 3H), 2.23 (d, *J* = 2.8 Hz, 6H), 2.18-2.14 (m, 3H), 1.83-1.67 (m, 6H); <sup>13</sup>C NMR (101 MHz, CDCl<sub>3</sub>) δ 163.8, 159.0, 148.4, 148.3, 143.1, 138.4, 131.6, 129.5, 128.9, 128.8, 128.6, 122.6, 119.3, 103.7, 55.6, 51.8, 41.7, 36.6, 29.7. HRMS (ESI) calcd for C<sub>27</sub>H<sub>29</sub>N<sub>2</sub>O<sub>2</sub> (M+H<sup>+</sup>) 413.2224, found 413.2222.

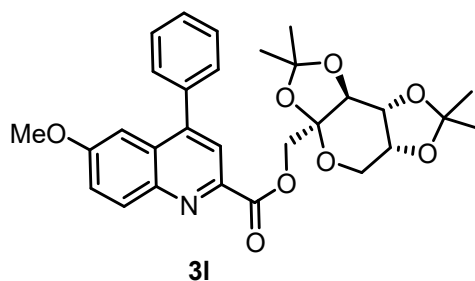

*((3a*S,*5a*R,*8a*R,*8b*S)-2,2,7,7-tetramethyltetrahydro-3aH-bis([1,3]dioxolo)[4,5-b:4',5'-d]pyran-3a-yl)methyl 6-methoxy-4-phenylquinoline-2-carboxylate (**3l**). Purified by flash column chromatography (silica gel, petroleum ether/EtOAc = 8/1 to 4/1 as eluent). White solid, 48% yield. <sup>1</sup>H NMR (400 MHz, CDCl<sub>3</sub>) δ 8.16 (d, *J* = 9.3 Hz, 1H), 8.09 (s, 1H), 7.56-7.47 (m, 5H), 7.41 (dd, *J* = 9.2, 2.8 Hz, 1H), 7.20 (d, *J* = 2.8 Hz, 1H), 4.78 (d, *J* = 11.7 Hz, 1H), 4.67-4.57 (m, 2H), 4.43 (d, *J* = 11.7 Hz, 1H), 4.27-4.25 (m, 1H), 3.98-3.95 (m, 1H), 3.83-3.77 (m, 4H), 1.55 (d, *J* = 2.9 Hz, 6H), 1.44 (s, 3H), 1.32 (s, 3H); <sup>13</sup>C NMR (101 MHz, CDCl<sub>3</sub>) δ 165.2, 159.7, 148.0, 144.9, 144.5, 137.9, 132.8, 129.4, 129.3, 128.9, 128.8, 123.0, 121.9, 109.3, 109.2, 103.3, 101.9, 71.0, 70.5, 70.2, 65.9, 61.5, 55.6, 26.7, 26.0, 25.6, 24.2. HRMS (ESI) calcd for C<sub>29</sub>H<sub>32</sub>NO<sub>8</sub> (M+H<sup>+</sup>) 522.2122, found 522.2123.

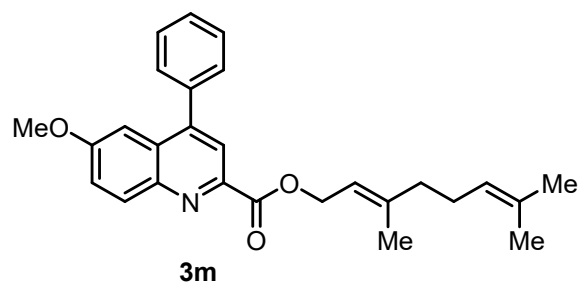

**(E)-3,7-dimethylocta-2,6-dien-1-yl 6-methoxy-4-phenylquinoline-2-carboxylate (3m).** Purified by flash column chromatography (silica gel, petroleum ether/EtOAc = 8/1 to 4/1 as eluent). White solid, 40% yield.  $^1\text{H}$  NMR (400 MHz,  $\text{CDCl}_3$ )  $\delta$  8.27 (d,  $J = 9.3$  Hz, 1H), 8.09 (s, 1H), 7.58-7.48 (m, 5H), 7.43 (dd,  $J = 9.2, 2.8$  Hz, 1H), 7.21 (d,  $J = 2.8$  Hz, 1H), 5.57-5.53 (m, 1H), 5.11-5.07 (m, 1H), 5.01 (d,  $J = 7.1$  Hz, 2H), 3.80 (s, 3H), 2.15-2.03 (m, 4H), 1.79 (d,  $J = 1.3$  Hz, 3H), 1.66 (d,  $J = 1.4$  Hz, 3H), 1.59 (d,  $J = 1.3$  Hz, 3H);  $^{13}\text{C}$  NMR (101 MHz,  $\text{CDCl}_3$ )  $\delta$  165.8, 159.6, 148.1, 145.6, 144.5, 142.6, 138.1, 132.9, 132.0, 129.5, 129.3, 128.9, 128.8, 123.9, 122.9, 122.0, 118.4, 103.4, 63.2, 55.7, 39.8, 26.4, 25.8, 17.8, 16.8. HRMS (ESI) calcd for  $\text{C}_{27}\text{H}_{29}\text{NO}_3\text{H}$  ( $\text{M}+\text{H}^+$ ) 416.2220, found 416.2214.

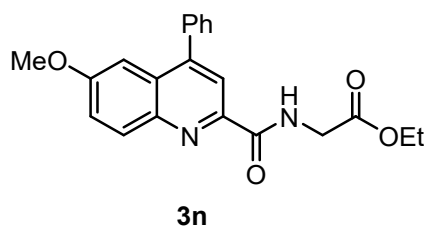

**Ethyl (6-methoxy-4-phenylquinoline-2-carbonyl)glycinate (3n).**<sup>9</sup> Purified by flash column chromatography (silica gel, petroleum ether/EtOAc = 4/1 to 2/1 as eluent). Pale yellow solid, 62% yield.  $^1\text{H}$  NMR (400 MHz,  $\text{CDCl}_3$ )  $\delta$  8.69 (t,  $J = 5.7$  Hz, 1H), 8.18 (s, 1H), 8.06 (d,  $J = 9.2$  Hz, 1H), 7.55-7.45 (m, 5H), 7.39 (dd,  $J = 9.2, 2.8$  Hz, 1H), 7.21 (d,  $J = 2.8$  Hz, 1H), 4.32 (d,  $J = 5.7$  Hz, 2H), 4.27 (q,  $J = 7.1$  Hz, 2H), 3.78 (s, 3H), 1.31 (t,  $J = 7.2$  Hz, 3H);  $^{13}\text{C}$  NMR (101 MHz,  $\text{CDCl}_3$ )  $\delta$  167.0, 165.2, 159.2, 148.3, 146.5, 143.3, 138.1, 131.8, 129.4, 129.1, 128.8, 128.6, 122.8, 119.5, 103.5, 61.6, 55.6, 41.6, 14.3.

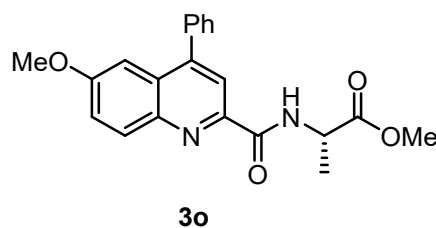

**Methyl (6-methoxy-4-phenylquinoline-2-carbonyl)-L-alaninate (3o).** Purified by flash column chromatography (silica gel, petroleum ether/EtOAc = 4/1 to 2/1 as eluent). Pale yellow solid, 61% yield. <sup>1</sup>H NMR (400 MHz, CDCl<sub>3</sub>) δ 8.68 (d, *J* = 8.0 Hz, 1H), 8.19 (s, 1H), 8.11 (d, *J* = 9.3 Hz, 1H), 7.57 – 7.48 (m, 5H), 7.43 (dd, *J* = 9.2, 2.8 Hz, 1H), 7.24 (d, *J* = 2.8 Hz, 1H), 4.88 (p, *J* = 7.3 Hz, 1H), 3.81 (s, 6H), 1.62 (d, *J* = 7.3 Hz, 3H); <sup>13</sup>C NMR (101 MHz, CDCl<sub>3</sub>) δ 173.57, 164.55, 159.20, 148.42, 146.61, 143.37, 138.18, 131.89, 129.48, 129.22, 128.85, 128.68, 122.85, 119.64, 103.58, 55.66, 52.67, 48.32, 18.70. HRMS (ESI) calcd for C<sub>21</sub>H<sub>21</sub>N<sub>2</sub>O<sub>4</sub> (M+H<sup>+</sup>) 365.1496, found 365.1495.

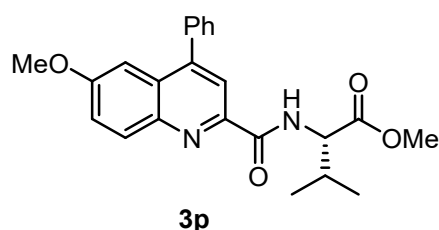

**Methyl (6-methoxy-4-phenylquinoline-2-carbonyl)-L-valinate (3p).** Purified by flash column chromatography (silica gel, petroleum ether/EtOAc = 4/1 to 2/1 as eluent). Pale yellow solid, 57% yield. <sup>1</sup>H NMR (400 MHz, CDCl<sub>3</sub>) δ 8.71 (d, *J* = 9.3 Hz, 1H), 8.19 (s, 1H), 8.12 (d, *J* = 9.2 Hz, 1H), 7.55–7.46 (m, 5H), 7.42 (dd, *J* = 9.2, 2.8 Hz, 1H), 7.23 (d, *J* = 2.8 Hz, 1H), 4.81 (dd, *J* = 9.3, 5.3 Hz, 1H), 3.79 (s, 6H), 2.40–2.33 (m, 1H), 1.07 (dd, *J* = 6.9, 2.0 Hz, 6H); <sup>13</sup>C NMR (101 MHz, CDCl<sub>3</sub>) δ 172.5, 164.8, 159.2, 148.4, 146.7, 143.3, 138.2, 132.0, 129.4, 129.2, 128.8, 128.6, 122.7, 119.7, 103.5, 57.5, 55.6, 52.3, 31.7, 19.3, 18.1. HRMS (ESI) calcd for C<sub>23</sub>H<sub>24</sub>N<sub>2</sub>O<sub>4</sub> (M+H<sup>+</sup>) 393.1809, found 393.1806.

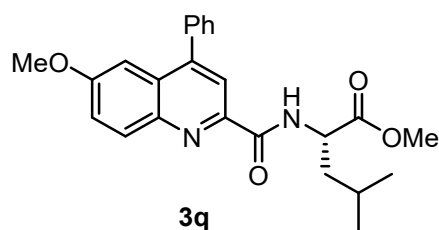

**Methyl (6-methoxy-4-phenylquinoline-2-carbonyl)-L-leucinate (3q).** Purified by flash column chromatography (silica gel, petroleum ether/EtOAc = 4/1 to 2/1 as eluent). Pale yellow solid, 52% yield. <sup>1</sup>H NMR (400 MHz, CDCl<sub>3</sub>) δ 8.57 (d, *J* = 8.8 Hz, 1H), 8.19 (s, 1H), 8.11 (d, *J* = 9.2 Hz, 1H), 7.56–7.45 (m, 5H), 7.42 (dd, *J* = 9.2, 2.8 Hz, 1H), 7.23 (d, *J* = 2.8 Hz, 1H), 4.94–4.89 (m, 1H), 3.79 (s, 3H), 3.78 (s, 3H), 1.88–1.76 (m, 3H), 1.05–0.97 (m, 6H); <sup>13</sup>C NMR (101 MHz, CDCl<sub>3</sub>) δ 173.5, 164.7, 159.2, 148.4,

146.6, 143.3, 138.2, 131.9, 129.4, 129.2, 128.8, 128.6, 122.8, 119.7, 103.6, 55.6, 52.4, 51.0, 41.9, 25.1, 23.1, 22.0. HRMS (ESI) calcd for C<sub>24</sub>H<sub>27</sub>N<sub>2</sub>O<sub>4</sub> (M+H<sup>+</sup>) 407.1965, found 407.1963.

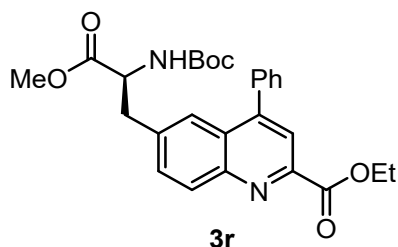

**Ethyl (S)-6-(2-((tert-butoxycarbonyl)amino)-3-methoxy-3-oxopropyl)-4-phenylquinoline-2-carboxylate (3r).** Purified by flash column chromatography (silica gel, petroleum ether/EtOAc = 4/1 to 2/1 as eluent). Pale yellow solid, 60% yield. <sup>1</sup>H NMR (400 MHz, CDCl<sub>3</sub>) δ 8.30 (d, *J* = 8.7 Hz, 1H), 8.10 (s, 1H), 7.67 (d, *J* = 2.0 Hz, 1H), 7.61–7.47 (m, 6H), 4.98 (d, *J* = 8.2 Hz, 1H), 4.65–4.60 (m, 1H), 4.55 (q, *J* = 7.1 Hz, 2H), 3.60 (s, 3H), 3.03–3.14 (m, 2H), 1.47 (t, *J* = 7.1 Hz, 3H), 1.33 (s, 9H); <sup>13</sup>C NMR (101 MHz, CDCl<sub>3</sub>) δ 172.0, 165.6, 155.0, 149.4, 147.7, 147.5, 137.6, 137.1, 131.9, 131.4, 129.6, 128.9, 127.7, 125.8, 121.7, 80.1, 62.4, 54.3, 52.4, 38.7, 28.3, 14.5. HRMS (ESI) calcd for C<sub>27</sub>H<sub>31</sub>N<sub>2</sub>O<sub>6</sub> (M+H<sup>+</sup>) 479.2177, found 479.2176.

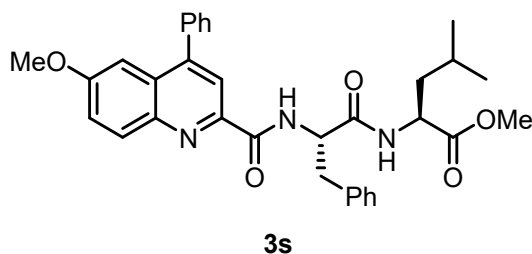

**Methyl (6-methoxy-4-phenylquinoline-2-carbonyl)-L-phenylalanyl-L-leucinate (3s).** Purified by flash column chromatography (silica gel, petroleum ether/EtOAc = 4/1 to 2/1 as eluent). Pale yellow solid, 60% yield. <sup>1</sup>H NMR (400 MHz, CDCl<sub>3</sub>) δ 8.80 (d, *J* = 8.6 Hz, 1H), 8.12 (s, 1H), 8.04 (d, *J* = 9.2 Hz, 1H), 7.55–7.44 (m, 5H), 7.39 (dd, *J* = 9.2, 2.8 Hz, 1H), 7.34–7.29 (m, 2H), 7.27 (s, 1H), 7.25 (d, *J* = 7.5 Hz, 1H), 7.19 (q, *J* = 2.4 Hz, 2H), 6.92 (d, *J* = 9.3 Hz, 1H), 5.07–5.06 (m, 1H), 4.59–4.57 (m, 1H), 3.77 (s, 3H), 3.65 (s, 3H), 3.37–3.22 (m, 2H), 1.61–1.41 (m, 3H), 0.81 (dd, *J* = 10.2, 5.8 Hz, 6H); <sup>13</sup>C NMR (101 MHz, CDCl<sub>3</sub>) δ 172.9, 170.8, 164.9, 159.2, 148.3, 146.3, 143.2, 138.0, 136.7, 131.8, 129.6, 129.4, 129.1, 128.7, 128.60, 128.57, 126.9, 122.8, 119.4,

103.5, 55.5, 54.5, 52.2, 51.0, 41.3, 38.3, 24.8, 22.7, 22.0; HRMS (ESI) calcd for  $C_{33}H_{36}N_3O_5$  ( $M+H^+$ ) 554.2650, found 554.2650.

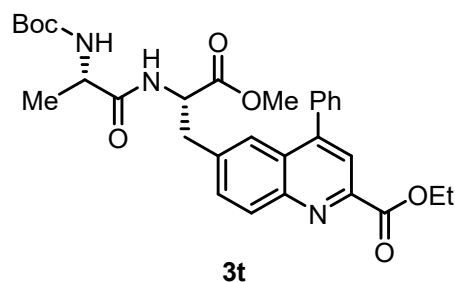

**Ethyl 6-((S)-2-((S)-2-((tert-butoxycarbonyl)amino)propanamido)-3-methoxy-3-oxopropyl)-4-phenylquinoline-2-carboxylate (3t).** Purified by flash column chromatography (silica gel, petroleum ether/EtOAc = 4/1 to 2/1 as eluent). White solid, 45% yield.  $^1H$  NMR (400 MHz,  $CDCl_3$ )  $\delta$  8.25 (d,  $J = 8.6$  Hz, 1H), 8.07 (s, 1H), 7.61 (d,  $J = 1.9$  Hz, 1H), 7.56–7.45 (m, 6H), 6.78 (d,  $J = 7.2$  Hz, 1H), 4.85–4.80 (m, 2H), 4.51 (q,  $J = 7.1$  Hz, 2H), 4.08–4.03 (m, 1H), 3.55 (s, 3H), 3.31 (dd,  $J = 14.0, 5.8$  Hz, 1H), 3.18 (dd,  $J = 14.0, 5.9$  Hz, 1H), 1.44 (t,  $J = 7.1$  Hz, 3H), 1.29 (s, 9H), 1.16 (d,  $J = 7.2$  Hz, 3H);  $^{13}C$  NMR (101 MHz,  $CDCl_3$ )  $\delta$  172.5, 171.4, 165.4, 155.4, 149.4, 147.6, 147.4, 137.5, 137.0, 131.9, 131.3, 129.6, 128.9, 127.6, 125.6, 121.6, 80.2, 62.3, 53.1, 52.4, 50.1, 37.9, 28.2, 18.0, 14.4. HRMS (ESI) calcd for  $C_{30}H_{35}N_3O_7Na$  ( $M+Na^+$ ) 572.2367, found 572.2372.

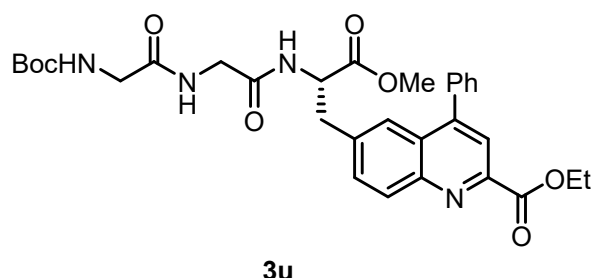

**Ethyl (S)-6-(12-(methoxycarbonyl)-2,2-dimethyl-4,7,10-trioxo-3-oxa-5,8,11-triazatridecan-13-yl)-4-phenylquinoline-2-carboxylate (3u).** Purified by flash column chromatography (silica gel, petroleum ether/EtOAc = 4/1 to 2/1 as eluent). White solid, 43% yield.  $^1H$  NMR (400 MHz,  $CDCl_3$ )  $\delta$  8.70 (t,  $J = 5.7$  Hz, 1H), 8.21 (s, 1H), 8.11 (d,  $J = 8.6$  Hz, 1H), 7.63 (d,  $J = 1.8$  Hz, 1H), 7.58–7.46 (m, 6H), 6.59 (d,  $J = 7.5$  Hz, 1H), 4.96 (s, 1H), 4.92–4.88 (m, 1H), 4.35–4.24 (m, 4H), 3.76–3.64 (m, 2H), 3.58 (s, 3H), 3.38–3.16 (m, 2H), 1.37 (s, 9H), 1.32 (t,  $J = 7.1$  Hz, 3H);  $^{13}C$  NMR (101 MHz,  $CDCl_3$ )  $\delta$  171.4, 169.9, 169.2, 164.9, 156.0, 149.7, 148.7, 146.5, 137.7, 136.2, 131.8, 130.7, 129.7, 128.9, 127.8, 125.9, 119.4, 80.5, 61.7, 53.2, 52.5, 44.4, 41.7, 38.0, 28.3, 14.3. HRMS (ESI) calcd for  $C_{31}H_{36}N_4O_8Na$  ( $M+Na^+$ ) 615.2425, found 615.2424.

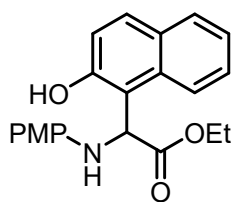

**3v**

**Ethyl 2-(2-hydroxynaphthalen-1-yl)-2-((4-methoxyphenyl)amino)acetate (3v).**<sup>12</sup> Purified by flash column chromatography (silica gel, petroleum ether/EtOAc = 16/1 to 8/1 as eluent). Pale red oil, 40% yield. <sup>1</sup>H NMR (400 MHz, CDCl<sub>3</sub>) δ 8.11 (d, *J* = 8.8 Hz, 1H), 7.83 (d, *J* = 7.8 Hz, 1H), 7.75 (d, *J* = 8.8 Hz, 1H), 7.59-7.53 (m, 1H), 7.43-7.37 (m, 1H), 7.08 (d, *J* = 8.8 Hz, 1H), 6.80-6.56 (m, 4H), 5.82 (s, 1H), 4.35-4.20 (m, 1H), 4.15-4.00 (m, 1H), 3.67 (s, 3H), 1.10 (t, *J* = 7.2 Hz, 3H); <sup>13</sup>C NMR (101 MHz, CDCl<sub>3</sub>) δ 171.3 156.2, 154.9, 138.9, 132.6, 130.7, 129.3, 129.1, 127.0, 123.1, 122.0, 119.9, 117.9, 114.9, 111.4, 62.6, 58.2, 55.6, 14.0.

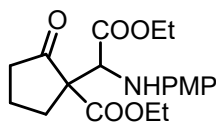

**3w**

**Ethyl 1-(2-ethoxy-1-(4-methoxyphenylamino)-2-oxoethyl)-2-oxocyclopentanecarboxylate (3w).**<sup>13</sup> Purified by flash column chromatography (silica gel, petroleum ether/EtOAc = 16/1 to 8/1 as eluent). Colourless oil, 51% yield. <sup>1</sup>H NMR (400 MHz, CDCl<sub>3</sub>) δ 6.81-6.67 (m, 4H), 4.69 (d, *J* = 30.7 Hz, 1H), 4.22-4.06 (m, 4H), 3.73 (d, *J* = 1.7 Hz, 3H), 2.62-2.36 (m, 2H), 2.33-2.04 (m, 2H), 2.03-1.87 (m, 2H), 1.27-1.15 (m, 6H); <sup>13</sup>C NMR (101 MHz, CDCl<sub>3</sub>) δ 212.5, 171.8, 169.0, 153.7, 141.0, 117.0, 116.1, 114.8, 114.7, 62.6 (62.64, 62.61), 61.9, 61.6, 55.7, 38.9, 30.0, 19.9, 14.2, 14.1.

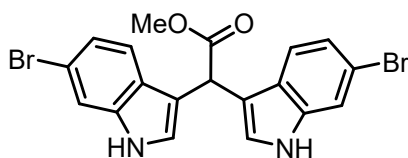

**3x**

**Methyl 2,2-bis(6-bromo-1H-indol-3-yl)acetate (3x).**<sup>14</sup> Purified by flash column chromatography (silica gel, petroleum ether/EtOAc = 4/1 as eluent). Yellow solid, 61% yield. <sup>1</sup>H NMR (400 MHz, CDCl<sub>3</sub>) δ 8.07 (s, 2H), 7.51 (d, *J* = 1.7 Hz, 2H), 7.44 (d, *J* = 8.8 Hz, 2H), 7.19 (dd, *J* = 8.7, 1.8 Hz, 2H), 7.11 (d, *J* = 2.7 Hz, 2H), 5.43 (s, 1H), 3.75



(s, 3H);  $^{13}\text{C}$  NMR (101 MHz,  $\text{CDCl}_3$ )  $\delta$  173.4, 137.3, 125.6, 124.0, 123.2, 120.7, 116.1, 114.3, 113.7, 52.5, 40.5.

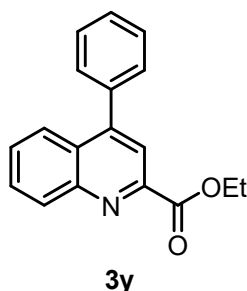

**Ethyl 4-phenylquinoline-2-carboxylate (3y).**<sup>16</sup> Purified by flash column chromatography (silica gel, petroleum ether/EtOAc = 8/1 to 4/1 as eluent). Colorless oily liquid, 18% yield.  $^1\text{H}$  NMR (400 MHz,  $\text{CDCl}_3$ )  $\delta$  8.39 (d,  $J$  = 8.5 Hz, 1H), 8.14 (s, 1H), 7.98 (dd,  $J$  = 8.5, 1.4 Hz, 1H), 7.79 (ddd,  $J$  = 8.4, 6.8, 1.5 Hz, 1H), 7.60 (ddd,  $J$  = 8.4, 6.8, 1.3 Hz, 1H), 7.56-7.50 (m, 5H), 4.57 (q,  $J$  = 7.1 Hz, 2H), 1.49 (t,  $J$  = 7.1 Hz, 3H);  $^{13}\text{C}$  NMR (101 MHz,  $\text{CDCl}_3$ )  $\delta$  165.7, 150.0, 148.3, 147.9, 137.7, 131.4, 130.1, 129.7, 128.9, 128.8, 128.7, 127.9, 125.9, 121.4, 62.5, 14.6.

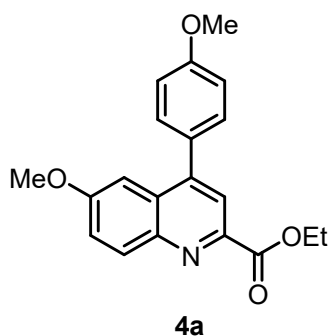

**Ethyl 6-methoxy-4-(p-tolyl)quinoline-2-carboxylate (4a).**<sup>9</sup> Purified by flash column chromatography (silica gel, petroleum ether/EtOAc = 8/1 to 4/1 as eluent). White solid, 98% yield.  $^1\text{H}$  NMR (400 MHz,  $\text{CDCl}_3$ )  $\delta$  8.24 (d,  $J$  = 9.3 Hz, 1H), 8.06 (s, 1H), 7.51-7.45 (m, 2H), 7.40 (dd,  $J$  = 9.3, 2.8 Hz, 1H), 7.24 (d,  $J$  = 2.8 Hz, 1H), 7.09-7.04 (m, 2H), 4.53 (q,  $J$  = 7.1 Hz, 2H), 3.89 (s, 3H), 3.80 (s, 3H), 1.46 (t,  $J$  = 7.1 Hz, 3H);  $^{13}\text{C}$  NMR (101 MHz,  $\text{CDCl}_3$ )  $\delta$  165.8, 160.0, 159.5, 147.8, 145.5, 144.4, 132.8, 130.7, 130.2, 129.4, 122.8, 121.8, 114.3, 103.4, 62.1, 55.6, 55.5, 14.5.

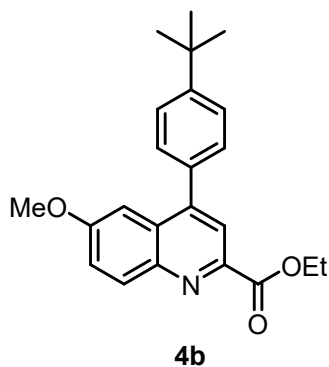

**Ethyl 4-(4-(tert-butyl)phenyl)-6-methoxyquinoline-2-carboxylate (4b).**<sup>15</sup> Purified by flash column chromatography (silica gel, petroleum ether/EtOAc = 8/1 to 4/1 as eluent). White solid, 75% yield. <sup>1</sup>H NMR (400 MHz, CDCl<sub>3</sub>) δ 8.25 (d, *J* = 9.3 Hz, 1H), 8.08 (s, 1H), 7.59-7.52 (m, 2H), 7.51-7.46 (m, 2H), 7.40 (dd, *J* = 9.3, 2.8 Hz, 1H), 7.29 (d, *J* = 2.9 Hz, 1H), 4.52 (q, *J* = 7.1 Hz, 2H), 3.81 (s, 3H), 1.45 (t, *J* = 7.1 Hz, 3H), 1.40 (s, 9H); <sup>13</sup>C NMR (101 MHz, CDCl<sub>3</sub>) δ 165.7, 159.5, 151.8, 148.1, 145.4, 144.4, 135.0, 132.7, 129.3, 129.1, 125.8, 122.6, 121.9, 103.6, 62.1, 55.6, 34.8, 31.4, 14.5.

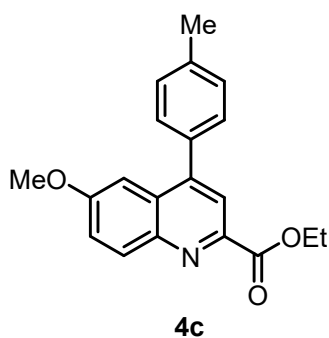

**Ethyl 4-(4-methylphenyl)-6-methoxyquinoline-2-carboxylate (4c).**<sup>15</sup> Purified by flash column chromatography (silica gel, petroleum ether/EtOAc = 8/1 to 4/1 as eluent). White solid, 95% yield. <sup>1</sup>H NMR (400 MHz, CDCl<sub>3</sub>) δ 8.26 (d, *J* = 9.3 Hz, 1H), 8.08 (s, 1H), 7.47-7.40 (m, 3H), 7.37-7.34 (m, 2H), 7.25 (d, *J* = 2.8 Hz, 1H), 4.54 (q, *J* = 7.1 Hz, 2H), 3.81 (s, 3H), 2.47 (s, 3H), 1.48 (t, *J* = 7.1 Hz, 3H); <sup>13</sup>C NMR (101 MHz, CDCl<sub>3</sub>) δ 165.8, 159.6, 148.3, 145.5, 144.5, 138.7, 135.1, 132.8, 129.6, 129.4, 122.9, 121.9, 103.5, 62.2, 55.7, 21.5, 14.6.

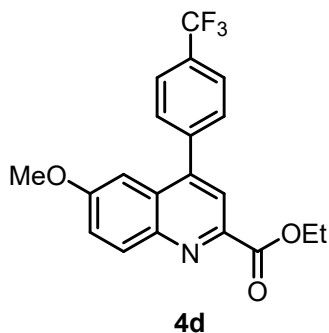

**Ethyl 4-(4-fluorophenyl)-6-methoxyquinoline-2-carboxylate (4d).**<sup>9</sup> Purified by flash column chromatography (silica gel, petroleum ether/EtOAc = 8/1 to 4/1 as eluent). Brown solid, 88% yield. <sup>1</sup>H NMR (400 MHz, CDCl<sub>3</sub>) δ 8.27 (d, *J* = 9.3 Hz, 1H), 8.06 (s, 1H), 7.81 (d, *J* = 8.1 Hz, 2H), 7.70-7.63 (m, 2H), 7.44 (dd, *J* = 9.3, 2.8 Hz, 1H), 7.07 (d, *J* = 2.8 Hz, 1H), 4.54 (q, *J* = 7.1 Hz, 2H), 3.80 (s, 3H), 1.47 (t, *J* = 7.1 Hz, 3H); <sup>13</sup>C NMR (101 MHz, CDCl<sub>3</sub>) δ 165.5, 159.9, 146.4, 145.4, 144.4, 141.7 (d, *J* = 1.4 Hz), 133.0, 130.8 (q, *J* = 32.5 Hz), 129.8, 128.8, 126.2 (q, *J* = 2.5 Hz), 125.8 (q, *J* = 3.8 Hz), 124.1 (q, *J* = 272.3 Hz), 123.1, 121.9, 102.9, 62.3, 55.7, 14.5.

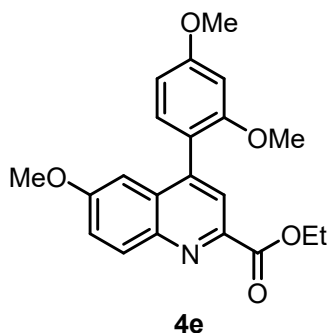

**Ethyl 4-(2,4-dimethoxyphenyl)-6-methoxyquinoline-2-carboxylate (4e).**<sup>9</sup> Purified by flash column chromatography (silica gel, petroleum ether/EtOAc = 8/1 to 4/1 as eluent). Pale yellow solid, 75% yield. <sup>1</sup>H NMR (400 MHz, CDCl<sub>3</sub>) δ 8.22 (d, *J* = 9.2 Hz, 1H), 8.05 (s, 1H), 7.38 (dd, *J* = 9.3, 2.8 Hz, 1H), 7.24-7.17 (m, 1H), 6.91 (d, *J* = 2.8 Hz, 1H), 6.67-6.61 (m, 2H), 4.53 (q, *J* = 7.1 Hz, 2H), 3.90 (s, 3H), 3.77 (s, 3H), 3.70 (s, 3H), 1.46 (t, *J* = 7.1 Hz, 3H); <sup>13</sup>C NMR (101 MHz, CDCl<sub>3</sub>) δ 165.9, 161.6, 159.2, 157.9, 145.5, 145.4, 144.2, 132.6, 131.9, 130.4, 123.0, 122.7, 119.4, 104.9, 103.9, 99.0, 62.1, 55.6, 55.5, 14.5.

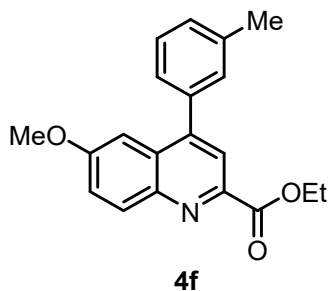

**Ethyl 6-methoxy-4-(m-tolyl)quinoline-2-carboxylate (4f).**<sup>15</sup> Purified by flash column chromatography (silica gel, petroleum ether/EtOAc = 8/1 to 4/1 as eluent). White solid, 83% yield. <sup>1</sup>H NMR (400 MHz, CDCl<sub>3</sub>) δ 8.26 (d, *J* = 9.3 Hz, 1H), 8.08 (s, 1H), 7.46-7.40 (m, 2H), 7.37-7.29 (m, 3H), 7.23 (d, *J* = 2.8 Hz, 1H), 4.55 (q, *J* = 7.1 Hz, 2H), 3.80 (s, 3H), 2.46 (s, 3H), 1.48 (t, *J* = 7.1 Hz, 3H); <sup>13</sup>C NMR (101 MHz, CDCl<sub>3</sub>) δ 165.8, 159.6, 148.3, 145.5, 144.5, 138.7, 138.0, 132.8, 130.1, 129.5, 129.4, 128.7, 126.5, 122.8, 121.9, 103.5, 62.2, 55.6, 21.6, 14.5.

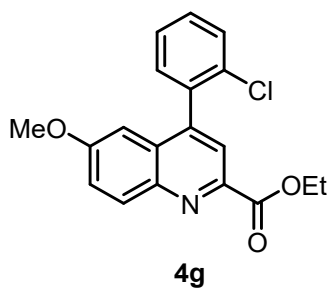

**Ethyl 4-(3-chlorophenyl)-6-methoxyquinoline-2-carboxylate (4g).**<sup>9</sup> Purified by flash column chromatography (silica gel, petroleum ether/EtOAc = 8/1 to 4/1 as eluent). Yellow solid, 84% yield. <sup>1</sup>H NMR (400 MHz, CDCl<sub>3</sub>) δ 8.27 (d, *J* = 9.3 Hz, 1H), 8.06 (s, 1H), 7.59-7.56 (m, 1H), 7.48-7.40 (m, 3H), 7.38-7.35 (m, 1H), 6.75 (d, *J* = 2.8 Hz, 1H), 4.57-4.51 (m, 2H), 3.76 (s, 3H), 1.47 (t, *J* = 7.1 Hz, 3H); <sup>13</sup>C NMR (101 MHz, CDCl<sub>3</sub>) δ 165.6, 159.7, 145.5, 145.4, 144.2, 136.6, 133.3, 132.8, 131.4, 130.2, 130.1, 129.4, 127.2, 123.1, 122.4, 103.4, 62.2, 55.7, 14.5.

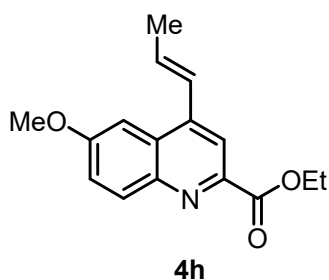

**Ethyl (E)-6-methoxy-4-(prop-1-en-1-yl)quinoline-2-carboxylate (4h).**<sup>9</sup> Purified by flash column chromatography (silica gel, petroleum ether/EtOAc = 8/1 to 4/1 as eluent).

White solid, 98% yield.  $^1\text{H}$  NMR (400 MHz,  $\text{CDCl}_3$ )  $\delta$  8.21-8.16 (m, 2H), 7.40 (dd,  $J = 9.3, 2.8$  Hz, 1H), 7.29 (d,  $J = 2.8$  Hz, 1H), 7.03-6.96 (m, 1H), 6.64-6.55 (m, 1H), 4.55 (q,  $J = 7.1$  Hz, 2H), 3.97 (s, 3H), 2.06 (dd,  $J = 6.7, 1.8$  Hz, 3H), 1.49 (t,  $J = 7.1$  Hz, 3H);  $^{13}\text{C}$  NMR (101 MHz,  $\text{CDCl}_3$ )  $\delta$  165.9, 159.3, 145.6, 144.2, 143.3, 133.8, 132.8, 128.5, 125.7, 122.7, 117.8, 101.3, 62.1, 55.7, 19.3, 14.5.

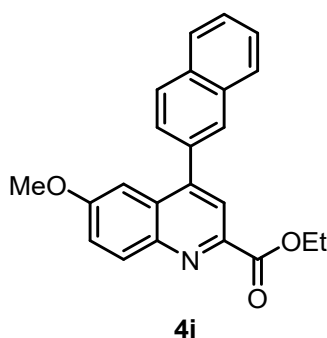

**Ethyl 6-methoxy-4-(naphthalen-1-yl)quinoline-2-carboxylate (4i).**<sup>9</sup> Purified by flash column chromatography (silica gel, petroleum ether/EtOAc = 8/1 to 4/1 as eluent). Pale yellow solid, 80% yield.  $^1\text{H}$  NMR (400 MHz,  $\text{CDCl}_3$ )  $\delta$  8.29 (d,  $J = 9.3$  Hz, 1H), 8.19 (s, 1H), 8.04-7.96 (m, 2H), 7.88-7.94 (m, 2H), 7.63 (dd,  $J = 8.4, 1.8$  Hz, 1H), 7.60-7.52 (m, 2H), 7.43 (dd,  $J = 9.3, 2.8$  Hz, 1H), 7.23 (d,  $J = 2.8$  Hz, 1H), 4.55 (q,  $J = 7.1$  Hz, 2H), 3.73 (s, 3H), 1.48 (t,  $J = 7.1$  Hz, 3H);  $^{13}\text{C}$  NMR (101 MHz,  $\text{CDCl}_3$ )  $\delta$  165.7, 159.6, 148.0, 145.4, 144.4, 135.4, 133.4, 133.1, 132.8, 129.3, 128.7, 128.4, 128.3, 127.9, 127.0, 126.9, 126.8, 122.9, 122.1, 103.3, 62.1, 55.5, 14.5.

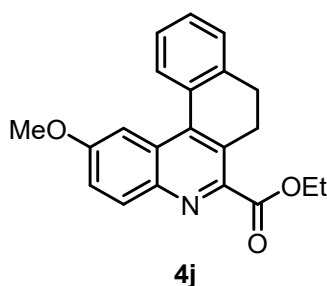

**Ethyl 2-methoxy-7,8-dihydrobenzo[k]phenanthridine-6-carboxylate (4j).**<sup>9</sup> Purified by flash column chromatography (silica gel, petroleum ether/EtOAc = 8/1 to 4/1 as eluent). Pale yellow solid, 92% yield.  $^1\text{H}$  NMR (400 MHz,  $\text{CDCl}_3$ )  $\delta$  8.13 (d,  $J = 9.2$  Hz, 1H), 7.99-7.92 (m, 1H), 7.77 (d,  $J = 2.8$  Hz, 1H), 7.44-7.33 (m, 4H), 4.53 (q,  $J = 7.1$  Hz, 2H), 3.90 (s, 3H), 2.97-2.94 (m, 2H), 2.86-2.76 (m, 2H), 1.47 (t,  $J = 7.1$  Hz, 3H);  $^{13}\text{C}$  NMR (101 MHz,  $\text{CDCl}_3$ )  $\delta$  167.0, 159.3, 146.7, 143.5, 140.4, 140.3, 132.4, 132.1, 130.6, 129.0, 128.5, 128.2, 126.42, 126.40, 121.6, 103.5, 62.0, 55.6, 28.9, 25.8, 14.4.

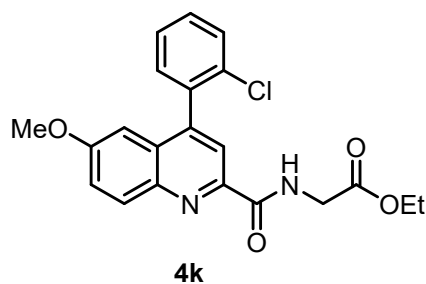

**Ethyl (4-(2-chlorophenyl)-6-methoxyquinoline-2-carbonyl)glycinate (4k).** Purified by flash column chromatography (silica gel, petroleum ether/EtOAc = 4/1 to 2/1 as eluent). Yellow solid, 80% yield. <sup>1</sup>H NMR (400 MHz, CDCl<sub>3</sub>) δ 8.67 (t, *J* = 5.5 Hz, 1H), 8.15 (s, 1H), 8.09 (d, *J* = 9.2 Hz, 1H), 7.57 (dd, *J* = 7.5, 1.9 Hz, 1H), 7.49-7.38 (m, 3H), 7.35 (dd, *J* = 7.1, 2.2 Hz, 1H), 6.76 (d, *J* = 2.8 Hz, 1H), 4.38-4.19 (m, 4H), 3.77 (s, 3H), 1.33 (t, *J* = 7.1 Hz, 3H); <sup>13</sup>C NMR (101 MHz, CDCl<sub>3</sub>) δ 170.1, 165.1, 159.4, 146.5, 145.9, 143.1, 136.8, 133.3, 131.9, 131.4, 130.1, 130.0, 129.4, 127.1, 123.1, 120.2, 103.6, 61.7, 55.7, 41.7, 14.4. HRMS (ESI) calcd for C<sub>21</sub>H<sub>19</sub>ClN<sub>2</sub>O<sub>4</sub>Na (M+Na<sup>+</sup>) 421.0926, found 421.0928.

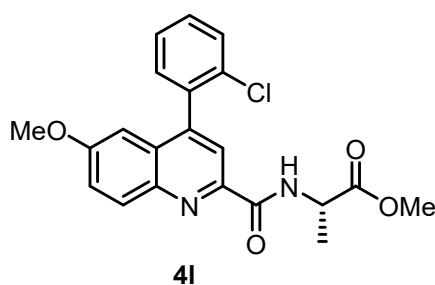

**Methyl (4-(2-chlorophenyl)-6-methoxyquinoline-2-carbonyl)-L-alaninate (4l).** Purified by flash column chromatography (silica gel, petroleum ether/EtOAc = 4/1 to 2/1 as eluent). Yellow solid, 82% yield. <sup>1</sup>H NMR (400 MHz, CDCl<sub>3</sub>) δ 8.68 (d, *J* = 8.1 Hz, 1H), 8.18-8.08 (m, 2H), 7.56 (dd, *J* = 7.3, 2.0 Hz, 1H), 7.49-7.37 (m, 3H), 7.37-7.33 (m, 1H), 6.76 (t, *J* = 2.3 Hz, 1H), 4.95-4.81 (m, 1H), 3.81 (s, 3H), 3.77 (s, 3H), 1.61 (d, *J* = 7.3 Hz, 3H); <sup>13</sup>C NMR (101 MHz, CDCl<sub>3</sub>) δ 173.6, 164.4, 159.3, 146.6, 145.9, 143.0, 136.8, 131.9, 131.4, 130.10, 130.03, 130.00, 129.4, 127.1, 123.1, 120.2, 103.6, 55.7, 52.6, 48.3, 18.7. HRMS (ESI) calcd for C<sub>21</sub>H<sub>19</sub>ClN<sub>2</sub>O<sub>4</sub>K (M+K<sup>+</sup>) 437.0665, found 437.0670.

## 6. References

1. J. Xie and Z.-Z. Huang, *Angew. Chem., Int. Ed.*, 2010, **49**, 10181-10185.
2. R. Martín-Rapún, S. Sayalero and M. A. Pericàs, *Green Chem.*, 2013, **15**, 3295-3301.
3. M. J. Frisch, G. W. Trucks, H. B. Schlegel, G. E. Scuseria, M. A. Robb, J. R. Cheeseman, G. Scalmani, V. Barone, B. Mennucci, G. A. Petersson, H. Nakatsuji, M. Caricato, X. Li, H. P. Hratchian, A. F. Izmaylov, J. Bloino, G. Zheng, J. L. Sonnenberg, M. Hada, M. Ehara, K. Toyota, R. Fukuda, J. Hasegawa, M. Ishida, T. Nakajima, Y. Honda, O. Kitao, H. Nakai, T. Vreven, J. A. Montgomery, Jr., J. E. Peralta, F. Ogliaro, M. Bearpark, J. J. Heyd, E. Brothers, K. N. Kudin, V. N. Staroverov, T. Keith, R. Kobayashi, J. Normand, K. Raghavachari, A. Rendell, J. C. Burant, S. S. Iyengar, J. Tomasi, M. Cossi, N. Rega, J. M. Millam, M. Klene, J. E. Knox, J. B. Cross, V. Bakken, C. Adamo, J. Jaramillo, R. Gomperts, R. E. Stratmann, O. Yazyev, A. J. Austin, R. Cammi, C. Pomelli, J. W. Ochterski, R. L. Martin, K. Morokuma, V. G. Zakrzewski, G. A. Voth, P. Salvador, J. J. Dannenberg, S. Dapprich, A. D. Daniels, O. Farkas, J. B. Foresman, J. V. Ortiz, J. Cioslowski, and D. J. Fox, Gaussian 09, D.01, Gaussian, Inc., Wallingford CT, 2009.
4. Parr, R. G.; Yang, W. *Density-functional Theory of Atoms and Molecules*; Oxford University Press: New York, 1989.
5. a) A. D. Becke, *J. Chem. Phys.*, 1993, **98**, 5648–5652; b) C. Lee, W. Yang, R. G. Parr *Phys. Rev. B*, 1988, **37**, 785–789.
6. C. Y. Legault, CYLVIEW, 1.0b, Université de Sherbrooke, 2009; <http://www.cylview.org>.
7. Y. Zhao, D. G. Truhlar, *J. Phys. Chem. Lett.*, 2008, **112**, 1095-1099.
8. D. Jacquemin, E. A. Perpète, I. Ciofini, C. Adamo, R. Valero, Y. Zhao, D. Truhlar, *J. Chem. Theory Comput.*, 2010, **6**, 2071- 2085.
9. X. Yang, L. Li, Y. Li and Y. Zhang, *J. Org. Chem.*, 2016, **81**, 12433–12442.
10. J. Wang, L. Li, Y. Guo, S. Li, S. Wang, Y. Li and Y. Zhang, *Org. Biomol. Chem.*, 2020, **18**, 8179-8185.
11. W. Jiang, Y. Wang, P. Niu, Z. Quan, Y. Su and C. Huo, *Org. Lett.*, 2018, **20**, 4649-4653.
12. S. Li, X. Yang, Y. Wang, H. Zhou, B. Zhang, G. Huang, Y. Zhang and Y. Li, *Adv. Synth. & Catal.*, 2018, **360**, 4452-4456.

13. X. W. Gao, Q. Y. Meng, J. X. Li, J. J. Zhong, T. Lei, X. B. Li, C. H. Tung and L. Z. Wu, *Acs Catal.*, 2015, **5**, 2391-2396.
14. T. Abe, R. Nakajima, T. Yamashiro and D. Sawada, *J. Nat. Prod.*, 2022, **85**, 2122-2125.
15. H. Huang, H. Jiang, K. Chen and H. Liu, *J. Org. Chem.*, 2009, **74**, 5476-5480.
16. X. Jia, F. Peng, C. Qing, C. Huo and X. Wang, *Org. Lett.*, 2012, **14**, 4030-4033.



## 7. Copies of $^1\text{H}$ and $^{13}\text{C}$ NMR Spectra

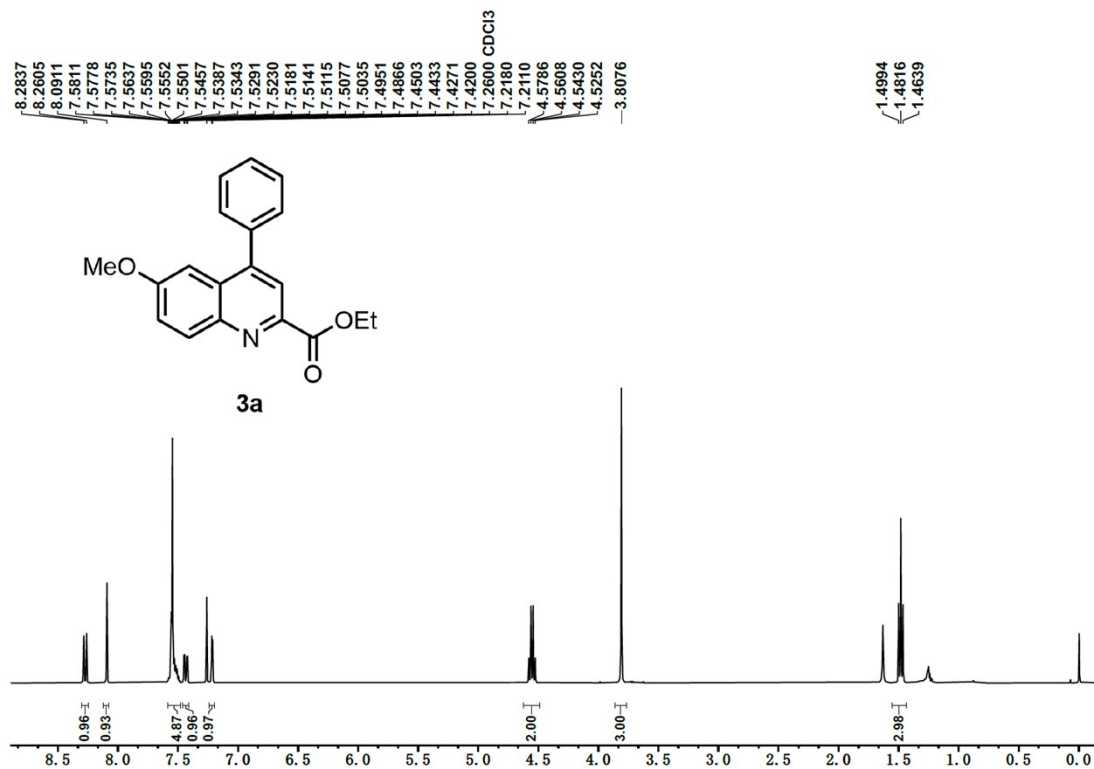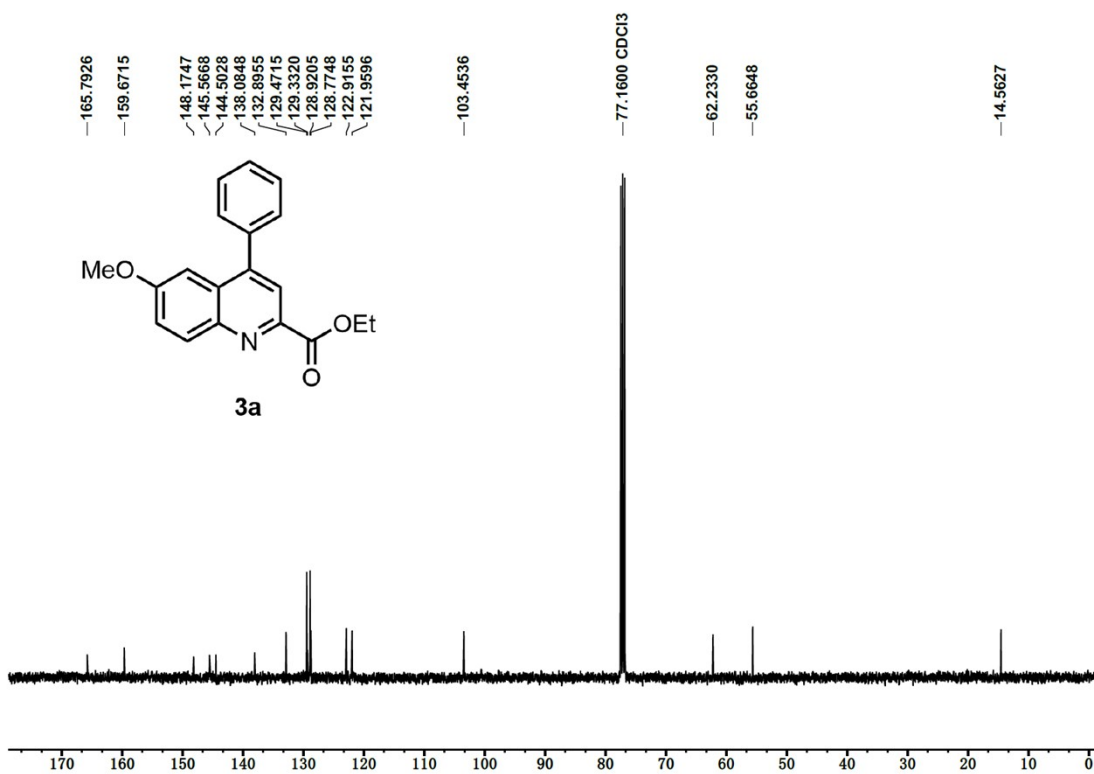

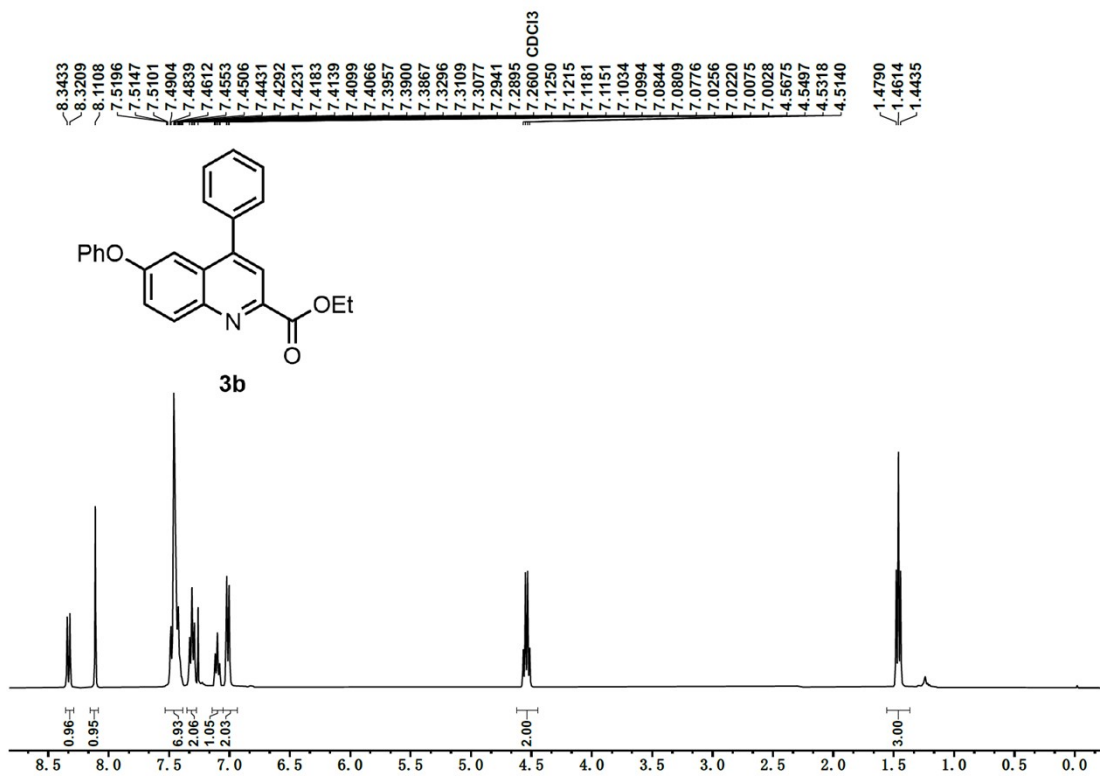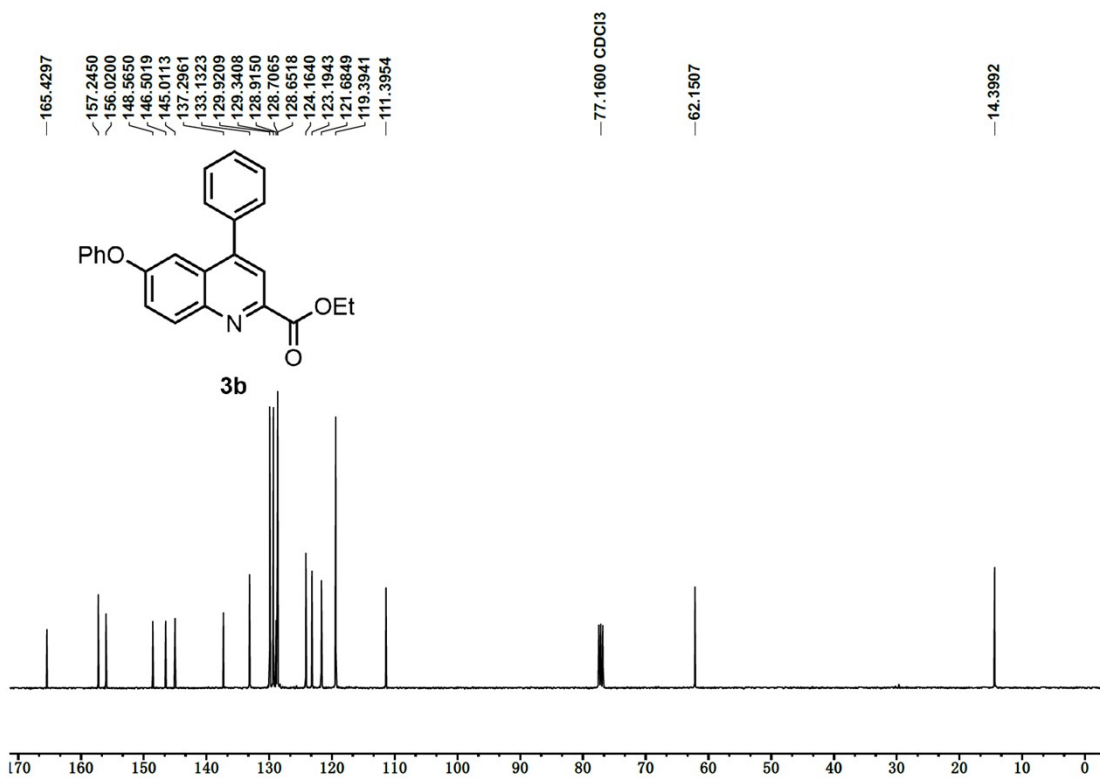

8.2797  
8.2565  
8.0859  
7.5771  
7.5735  
7.5692  
7.5631  
7.5599  
7.5560  
7.5544  
7.5509  
7.5484  
7.5403  
7.5305  
7.5260  
7.5205  
7.5145  
7.5098  
7.5080  
7.5042  
7.5017  
7.4979  
7.4910  
7.4832  
7.4451  
7.4383  
7.4221  
7.4151  
7.2034  
7.1965  
4.5797  
4.5620  
4.5441  
4.5263  
4.0383  
4.0208  
4.0034  
3.9860

1.5011  
1.4834  
1.4656  
1.4363  
1.4189  
1.4014

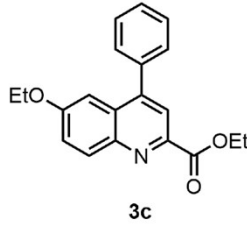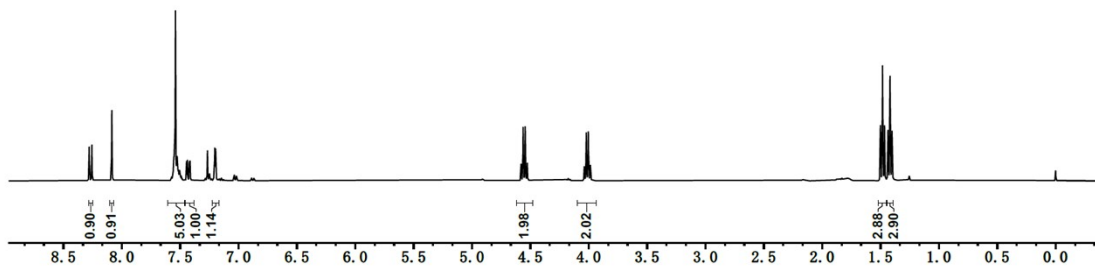

165.5868  
158.8092  
147.8545  
145.2107  
144.1636  
137.8863  
132.6152  
129.2496  
129.1325  
128.6893  
128.5029  
122.8830  
121.6798

103.9042

63.7310  
61.9874

14.4980  
14.3403

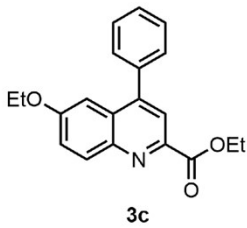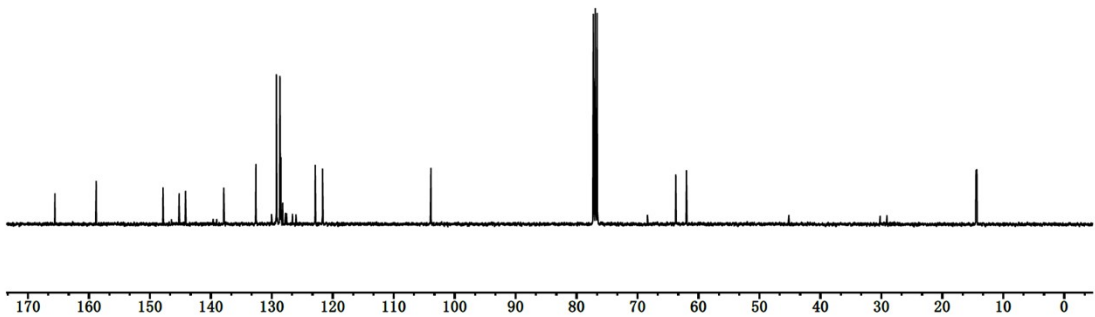

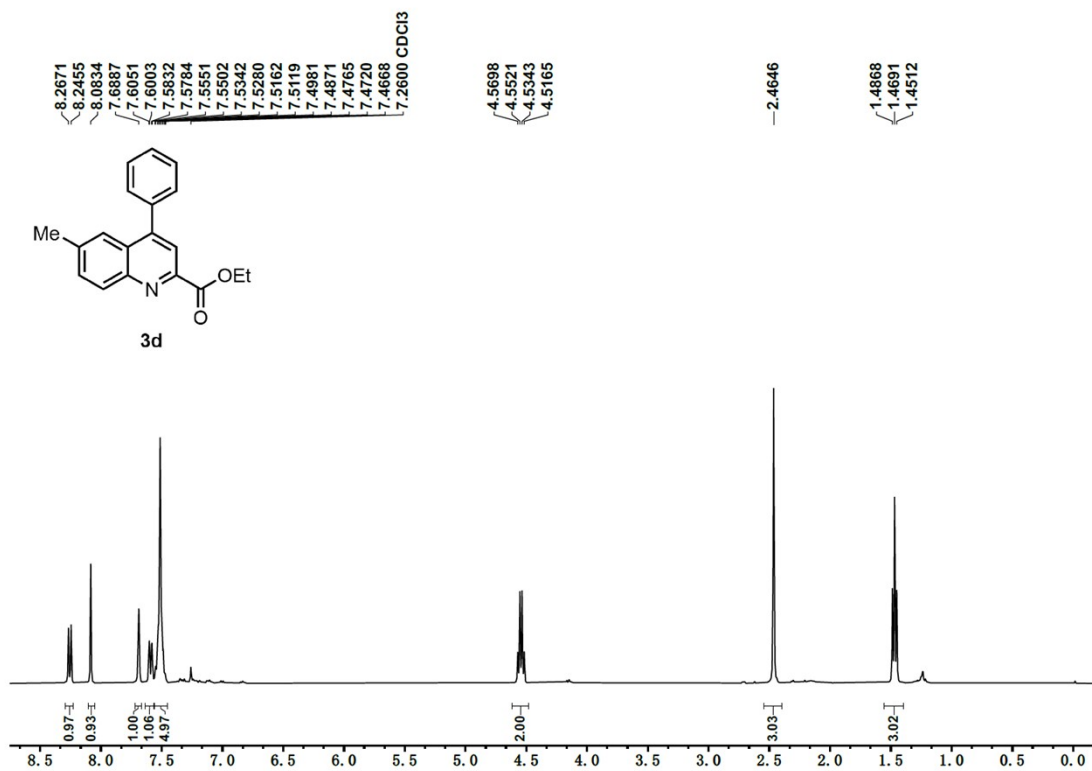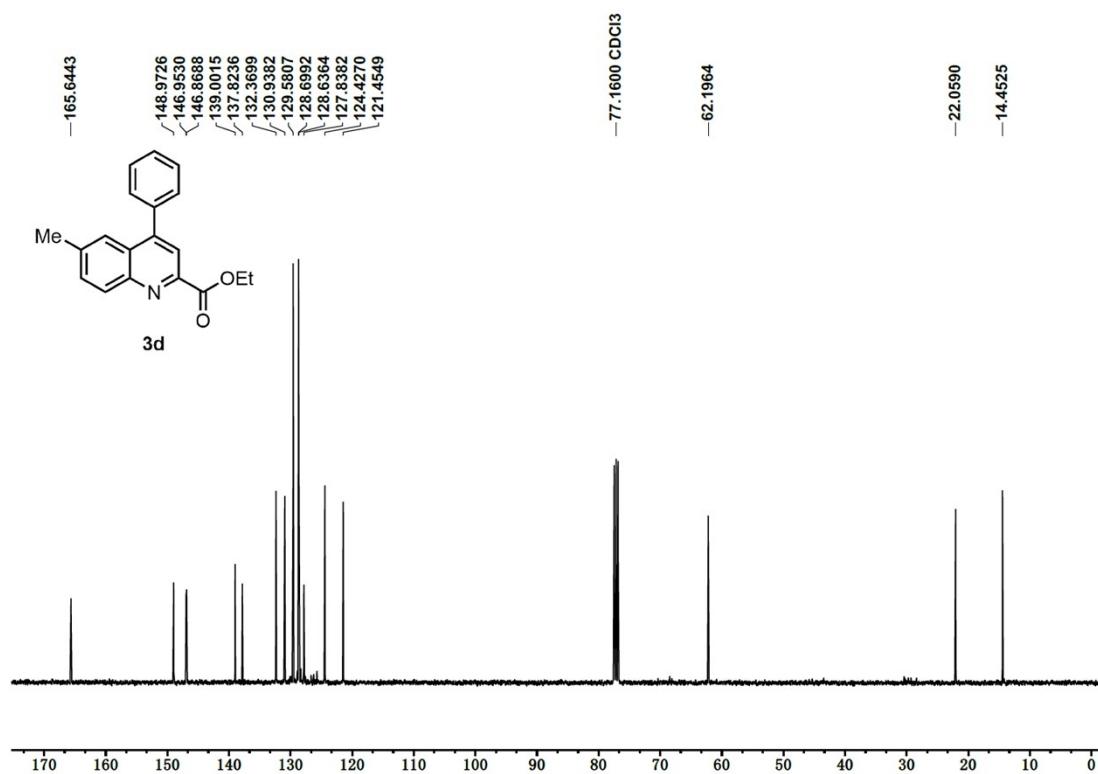

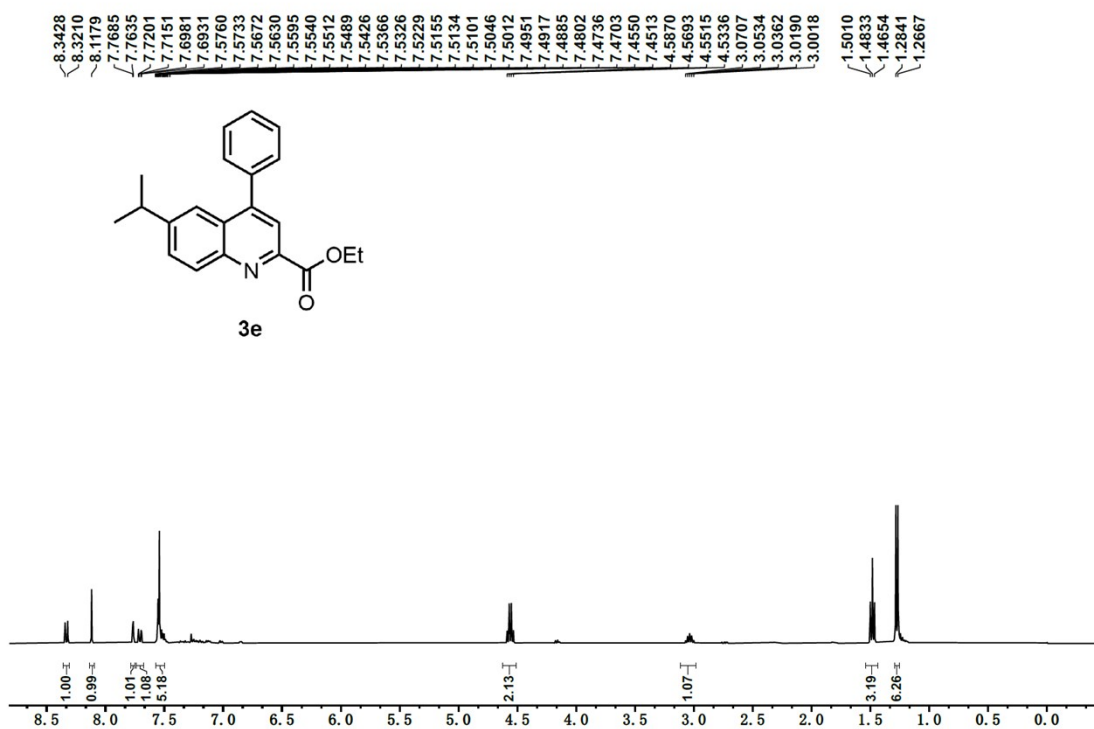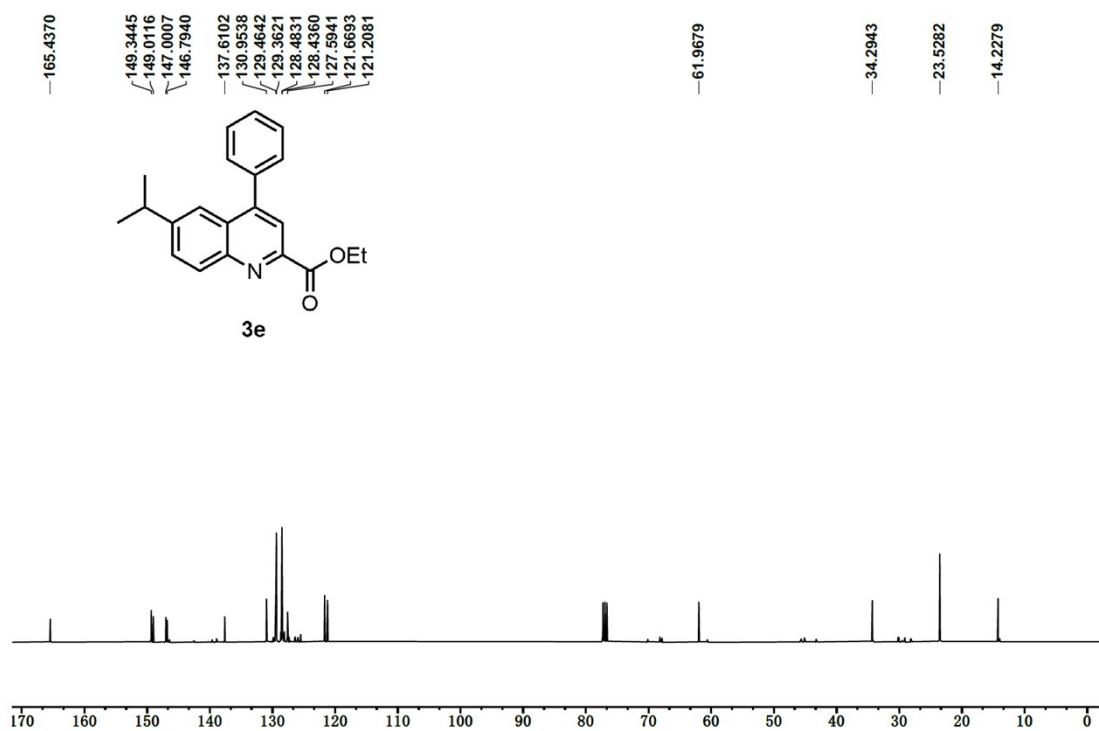

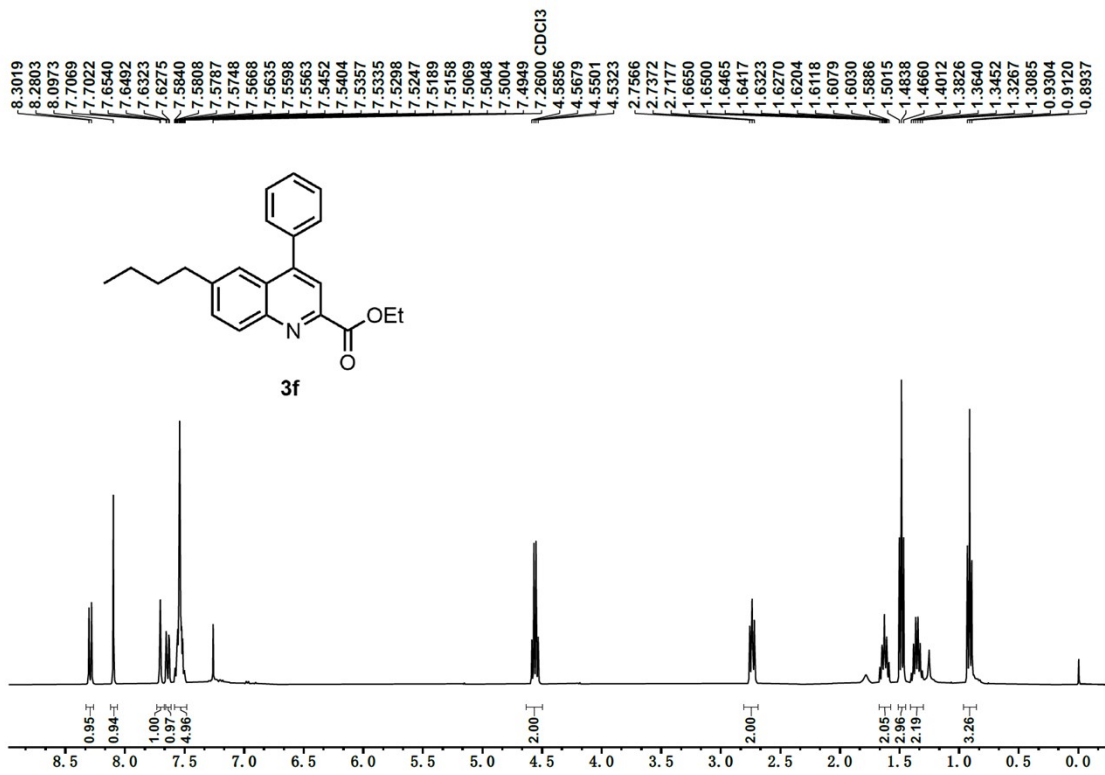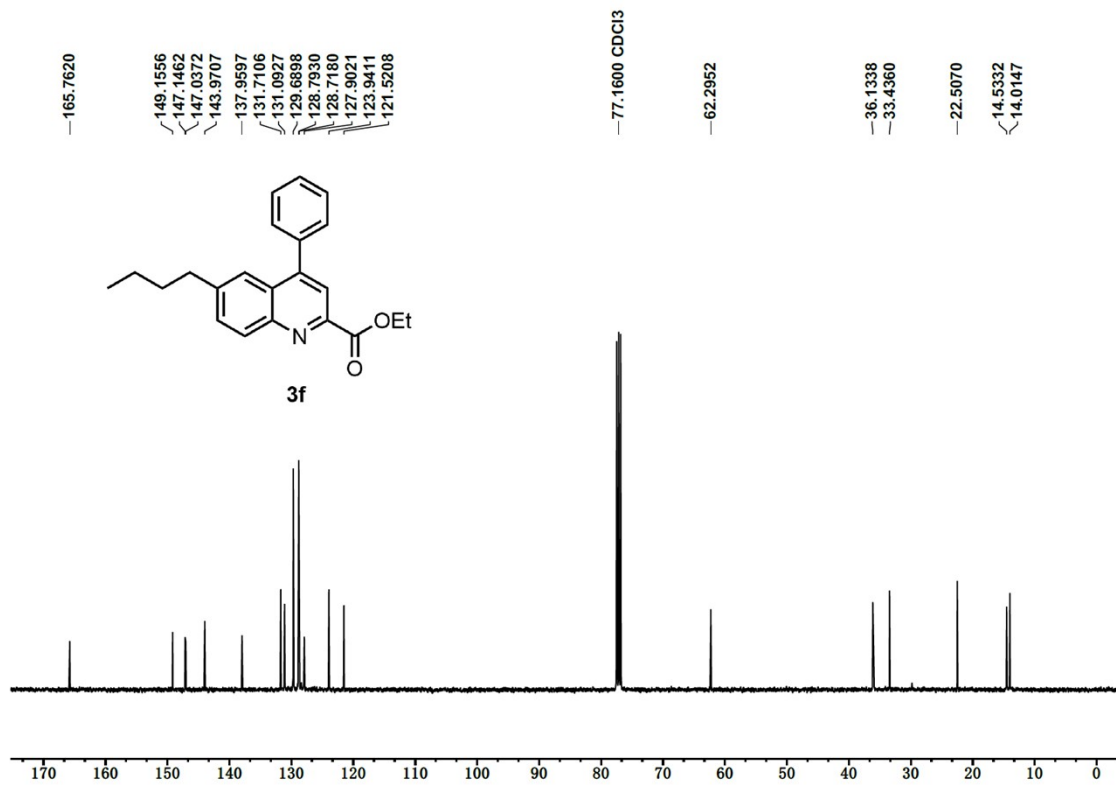

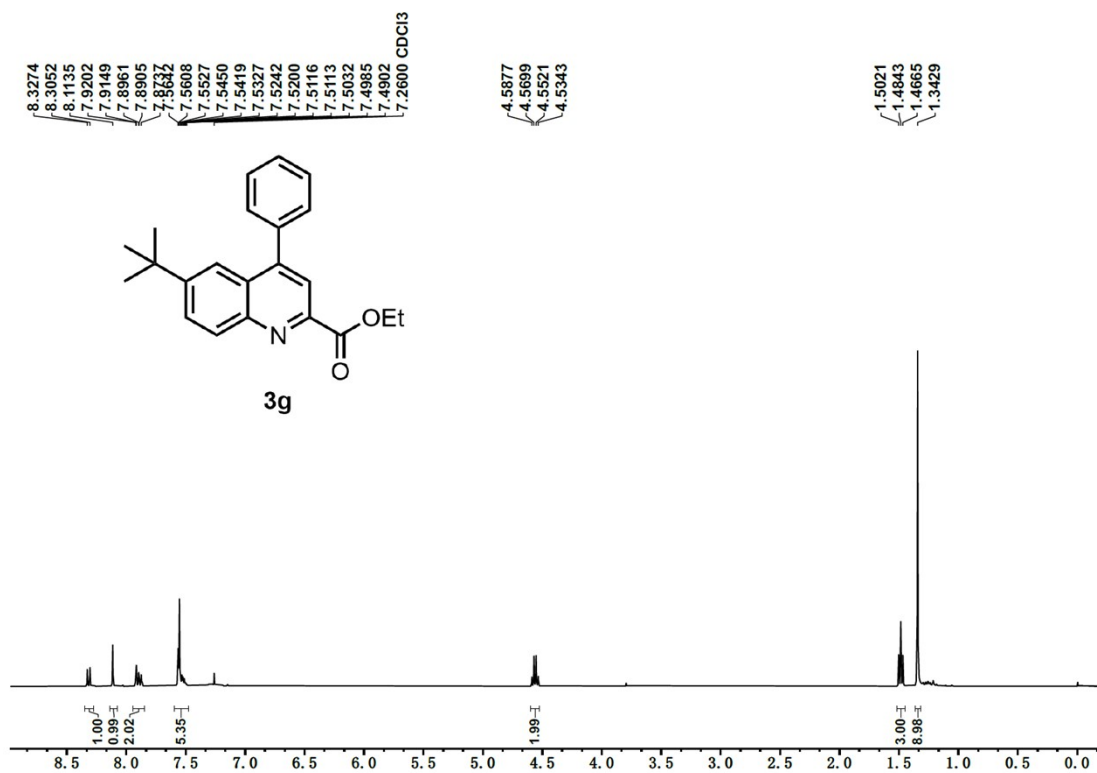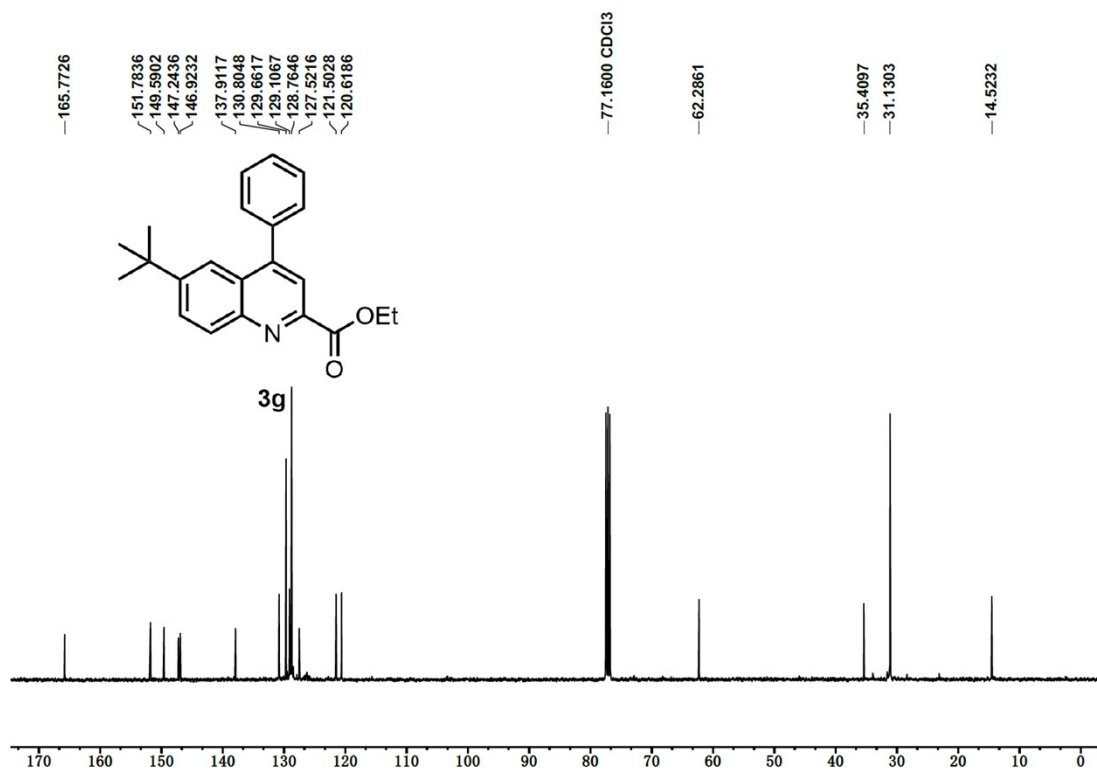

8.2950  
8.2720  
8.0743  
7.5568  
7.5527  
7.5504  
7.5426  
7.5404  
7.5281  
7.5228  
7.5211  
7.5152  
7.5115  
7.5062  
7.5047  
7.5011  
7.4916  
7.4891  
7.4847  
7.4419  
7.4388  
7.4350  
7.4315  
7.4188  
7.4156  
7.4117  
7.4082  
7.2115  
7.2046  
4.5011  
4.4839  
4.4667  
3.7908  
1.8795  
1.8620  
1.8559  
1.8471  
1.8438  
1.8391  
1.8246  
1.8071  
1.5366  
1.5180  
1.5042  
1.4993  
1.4957  
1.4855  
1.4800  
1.4673  
1.4616  
1.4433  
1.0024  
0.9840  
0.9654

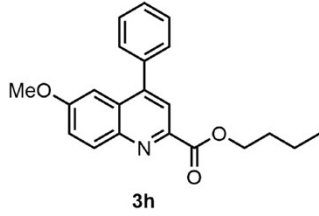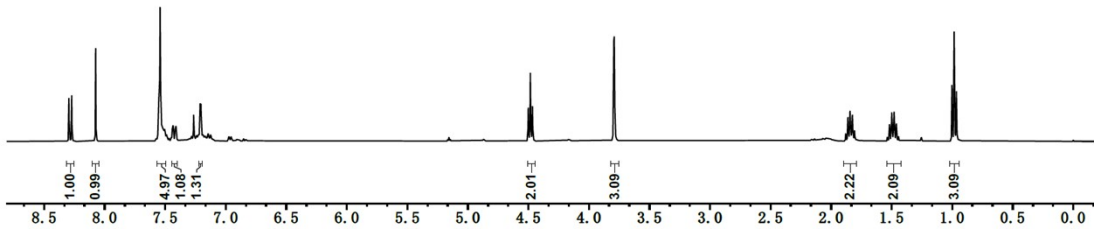

165.4849  
159.3647  
147.8762  
145.2124  
144.2120  
137.7890  
132.5871  
129.1777  
129.0164  
128.6483  
128.4970  
122.6549  
121.6217  
103.1108  
65.7755  
55.3595  
30.6315  
19.0496  
13.6625

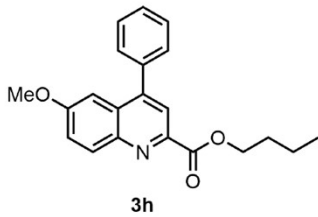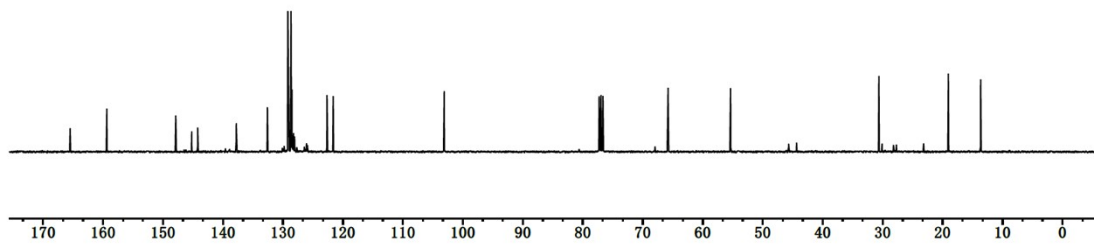



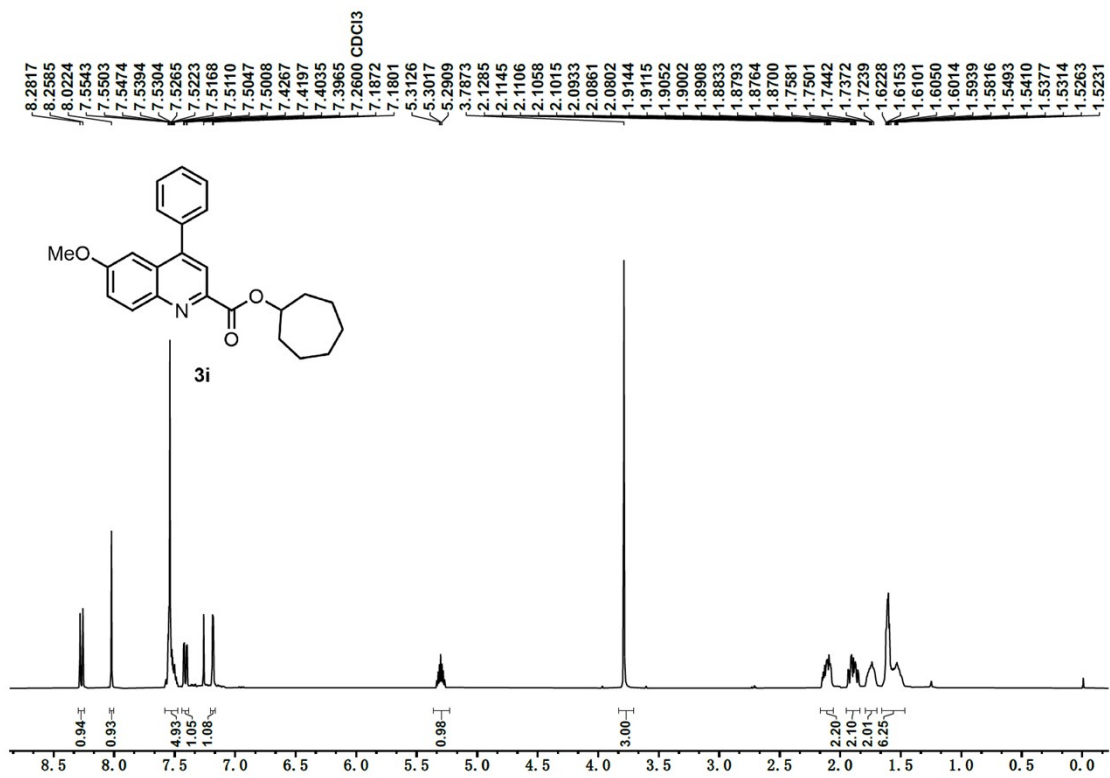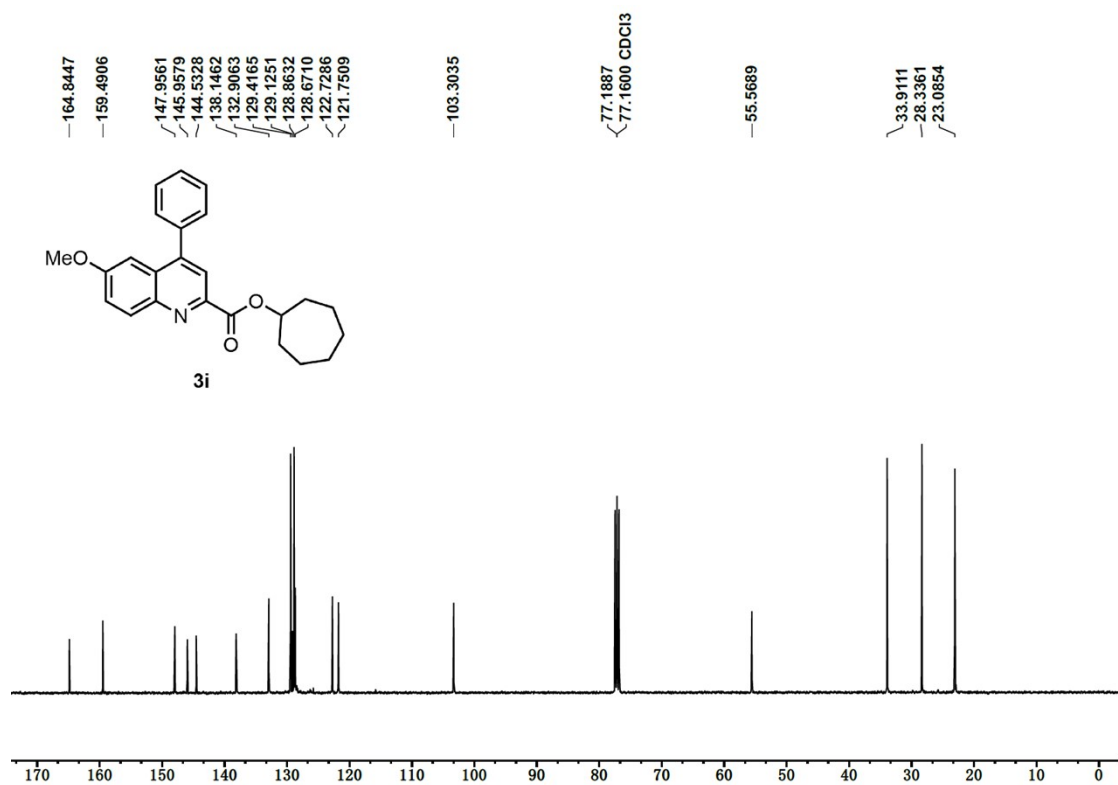

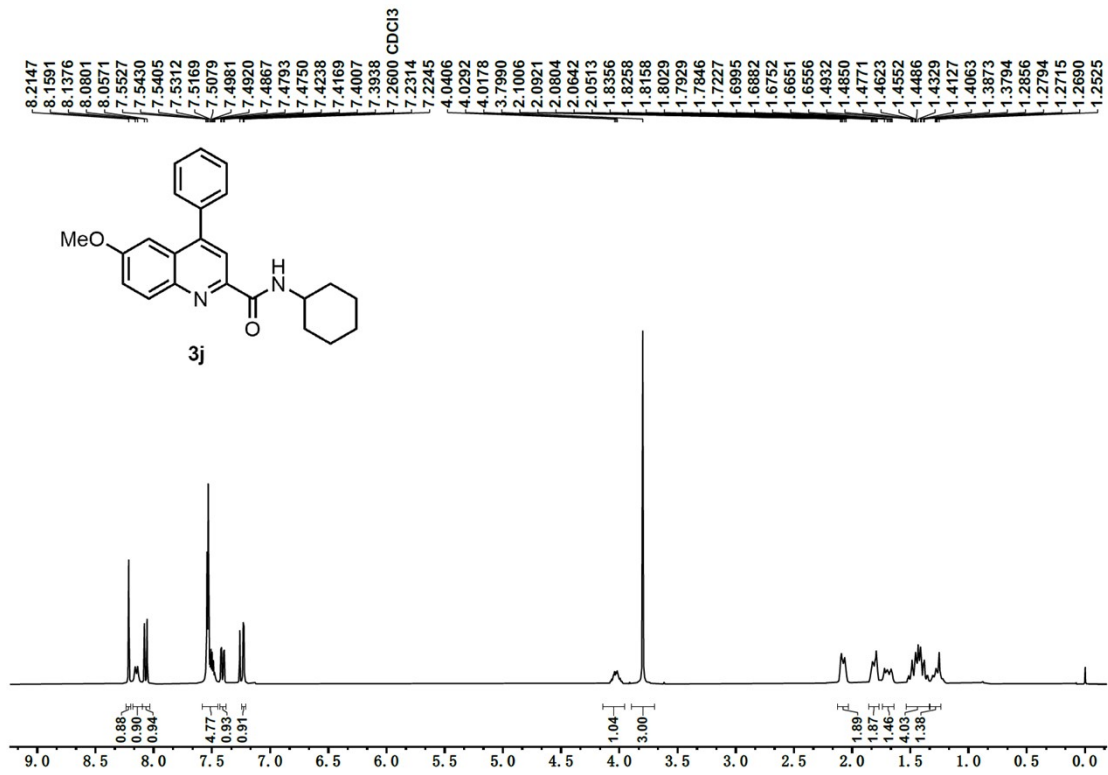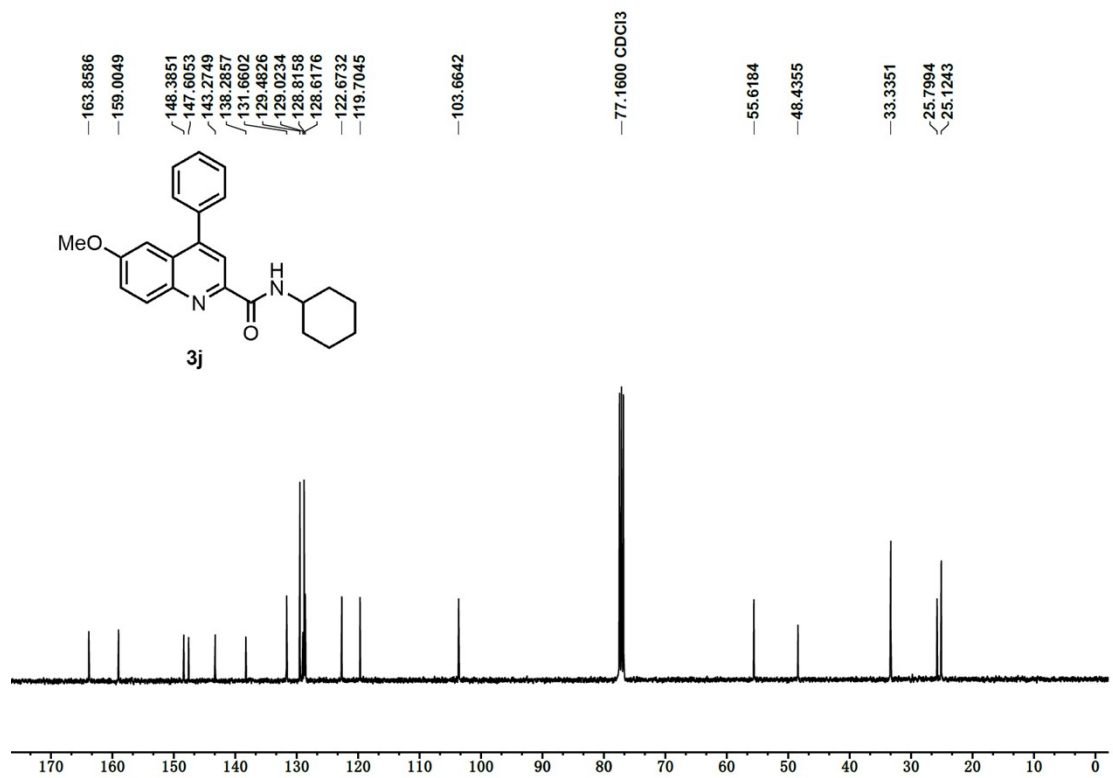

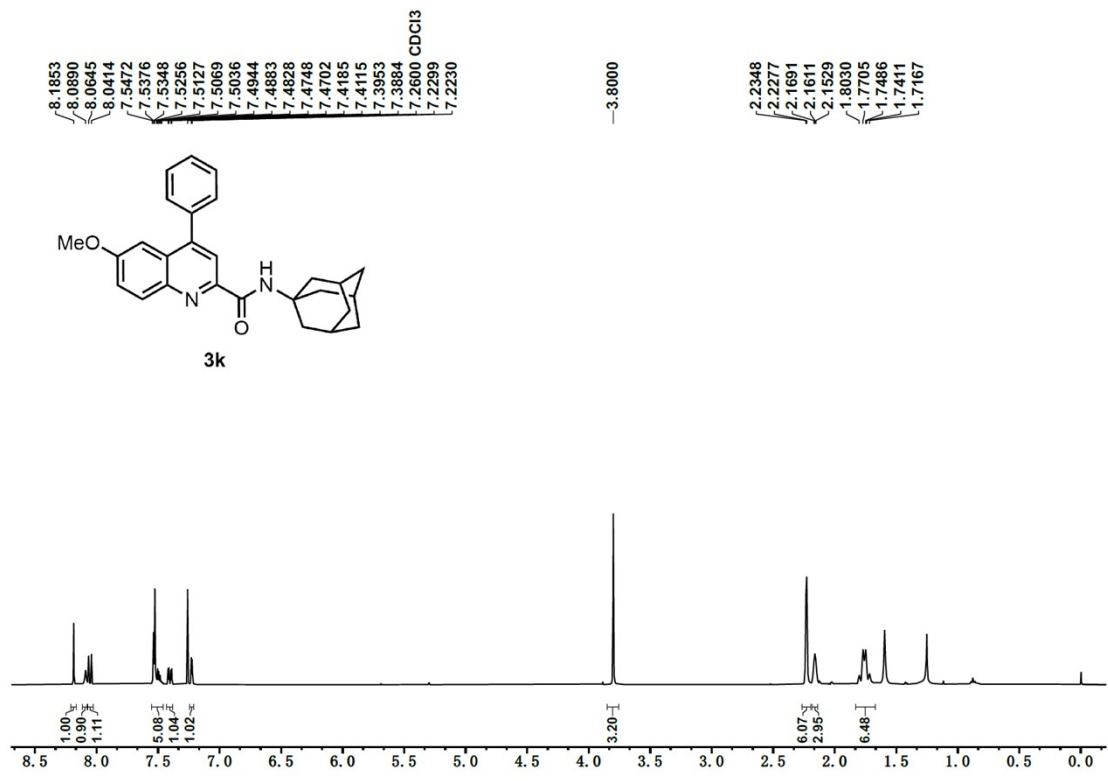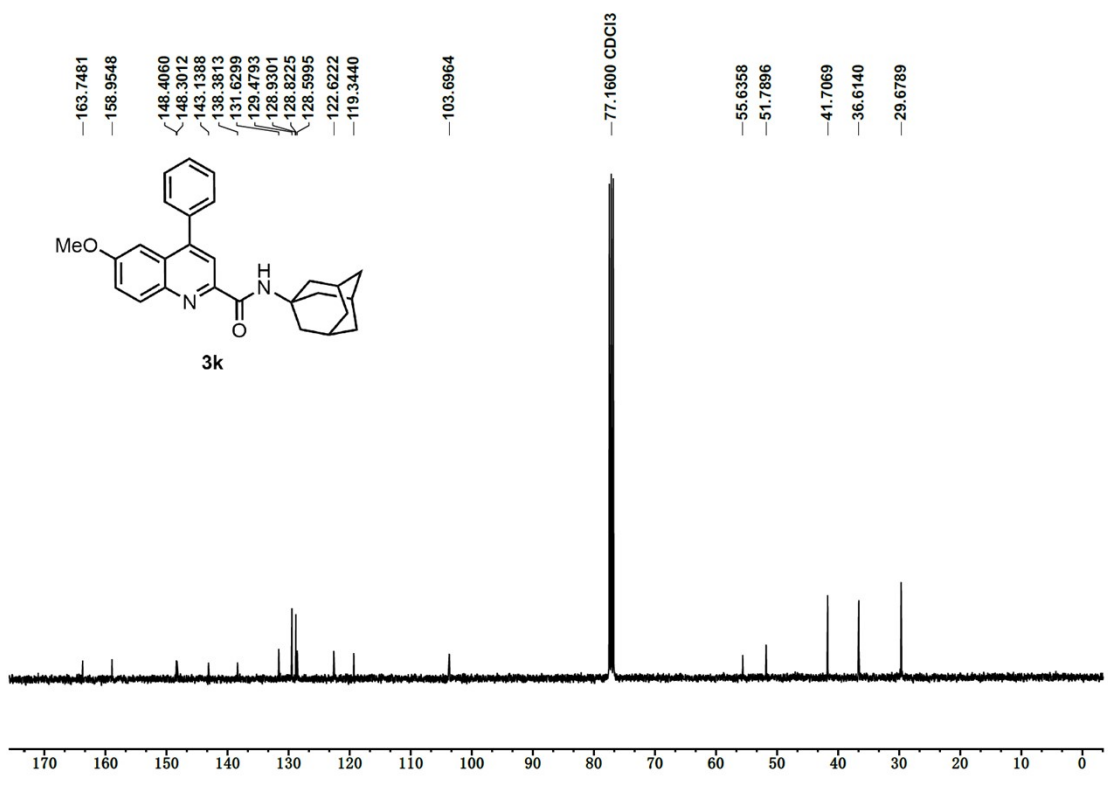

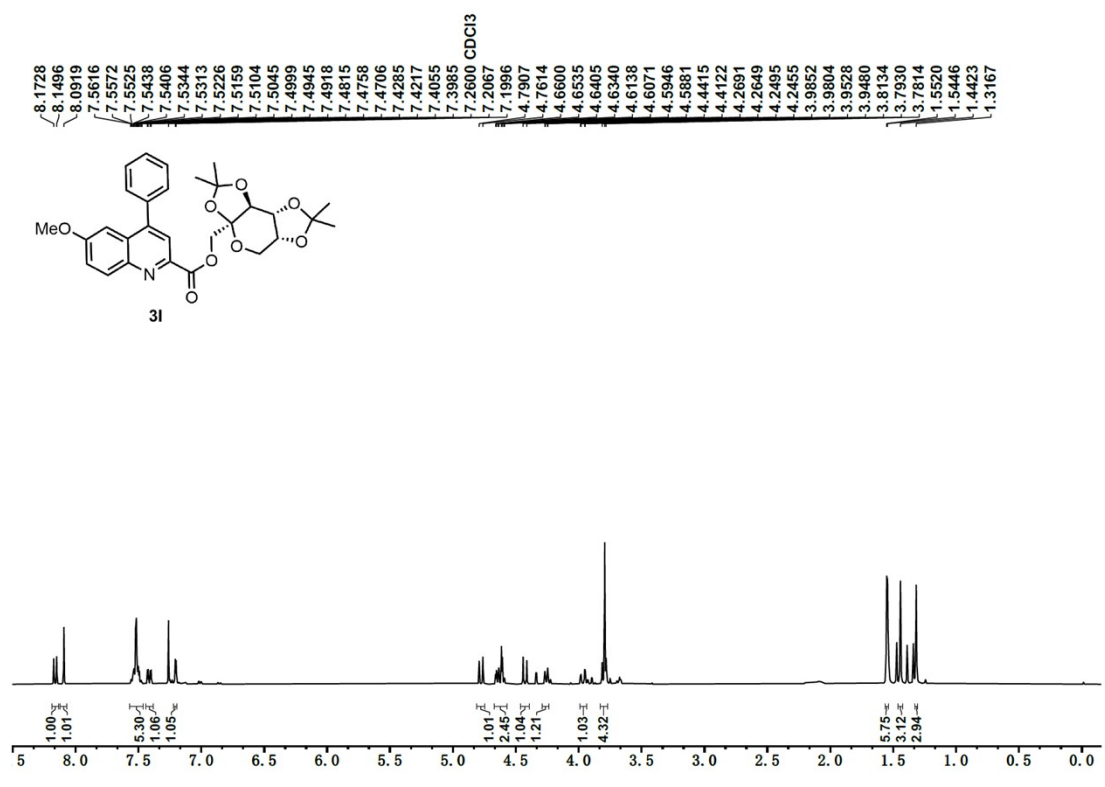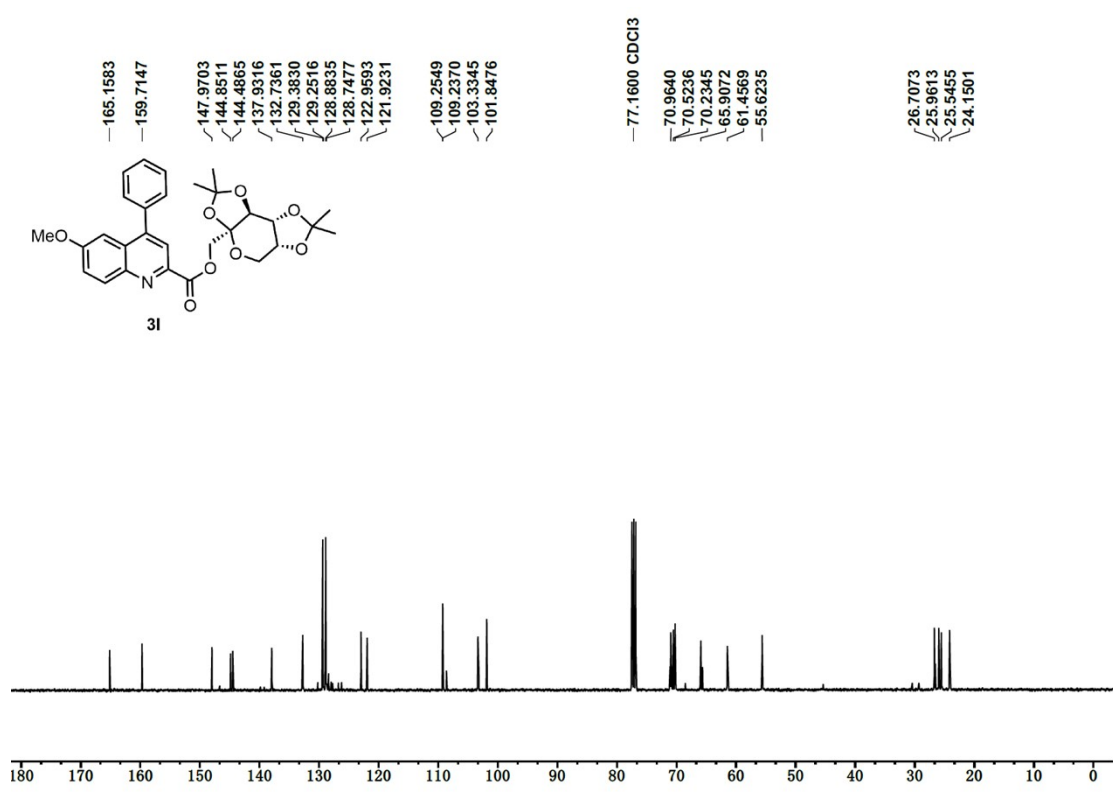

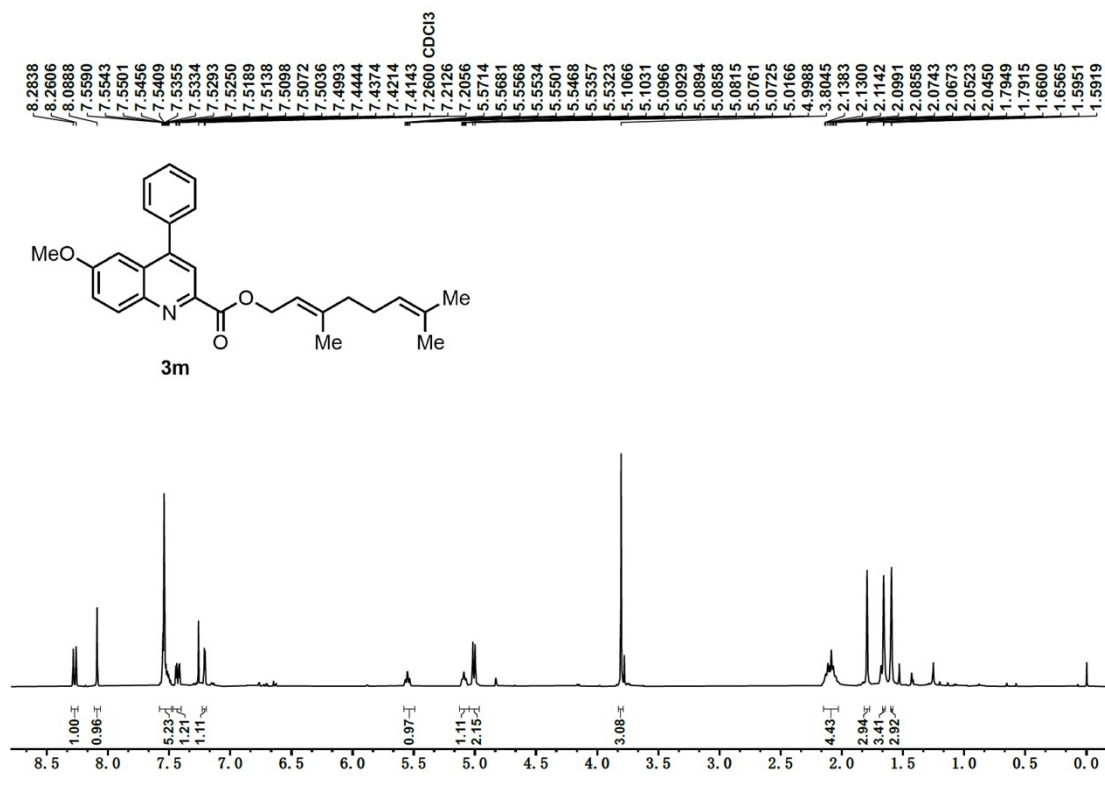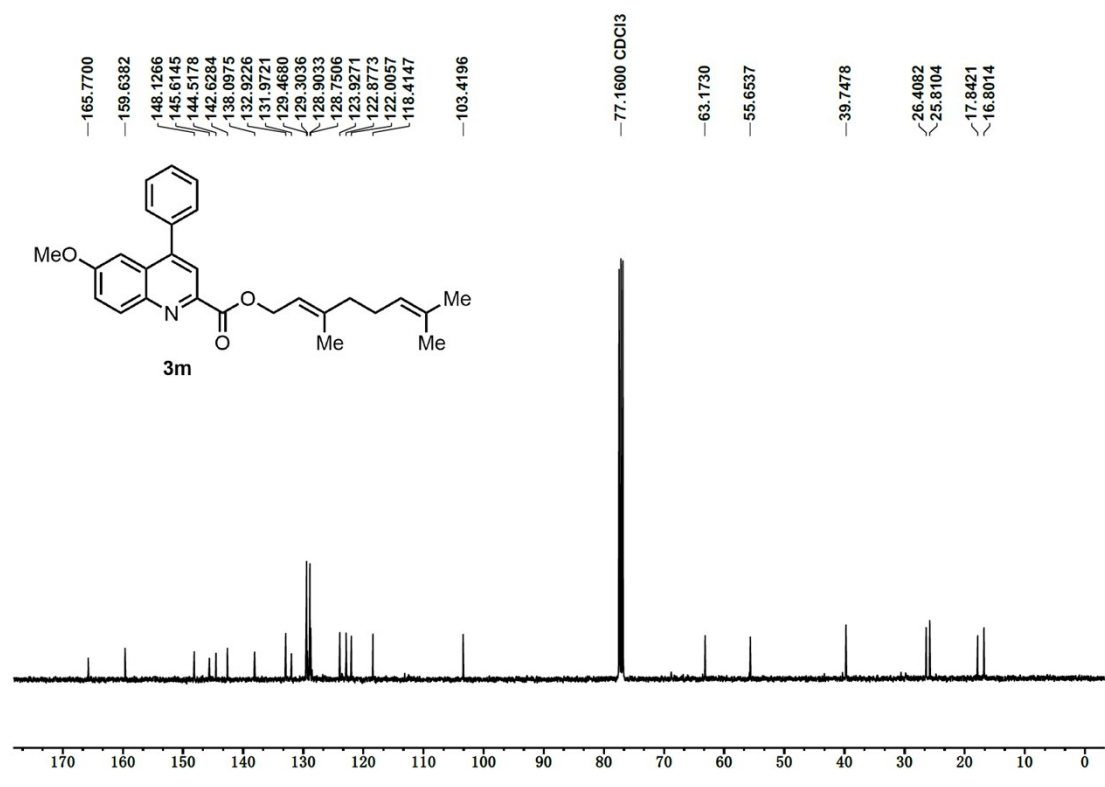

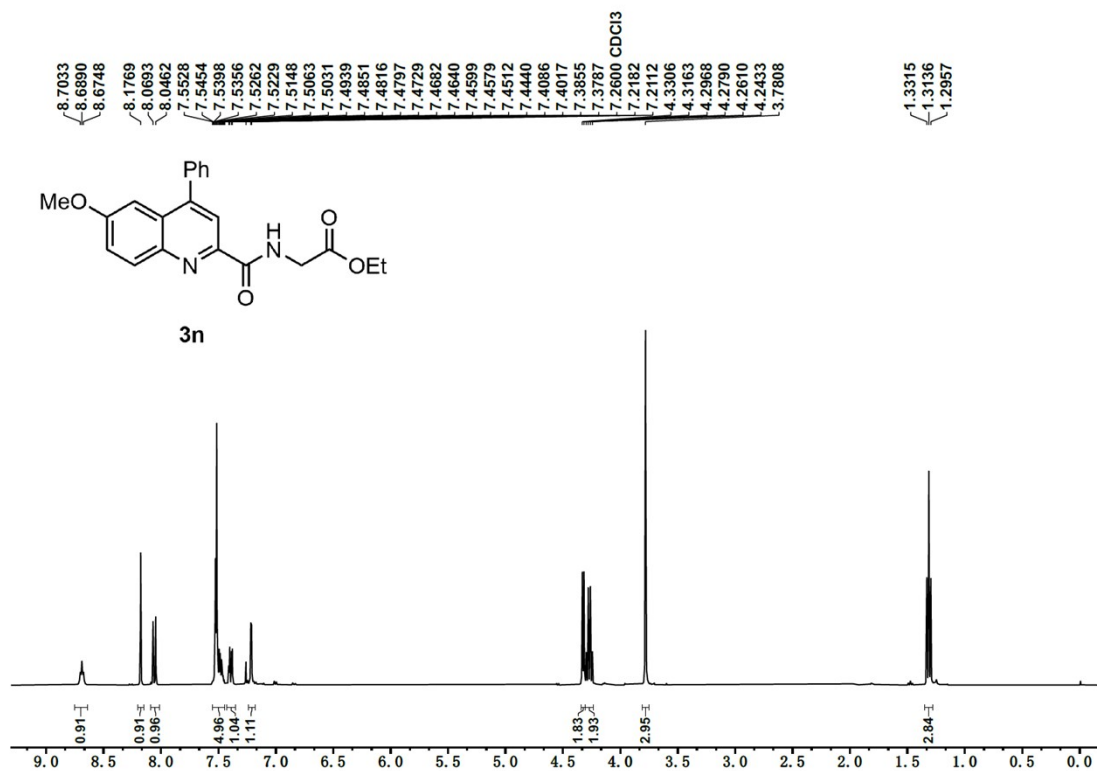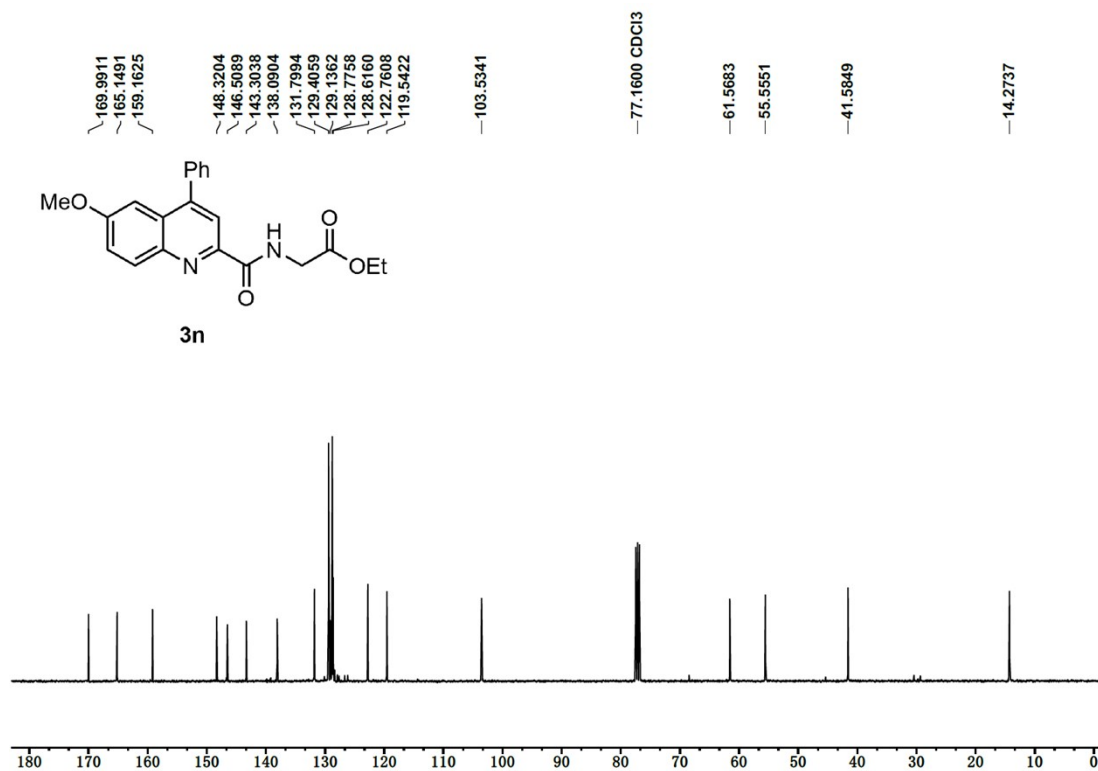

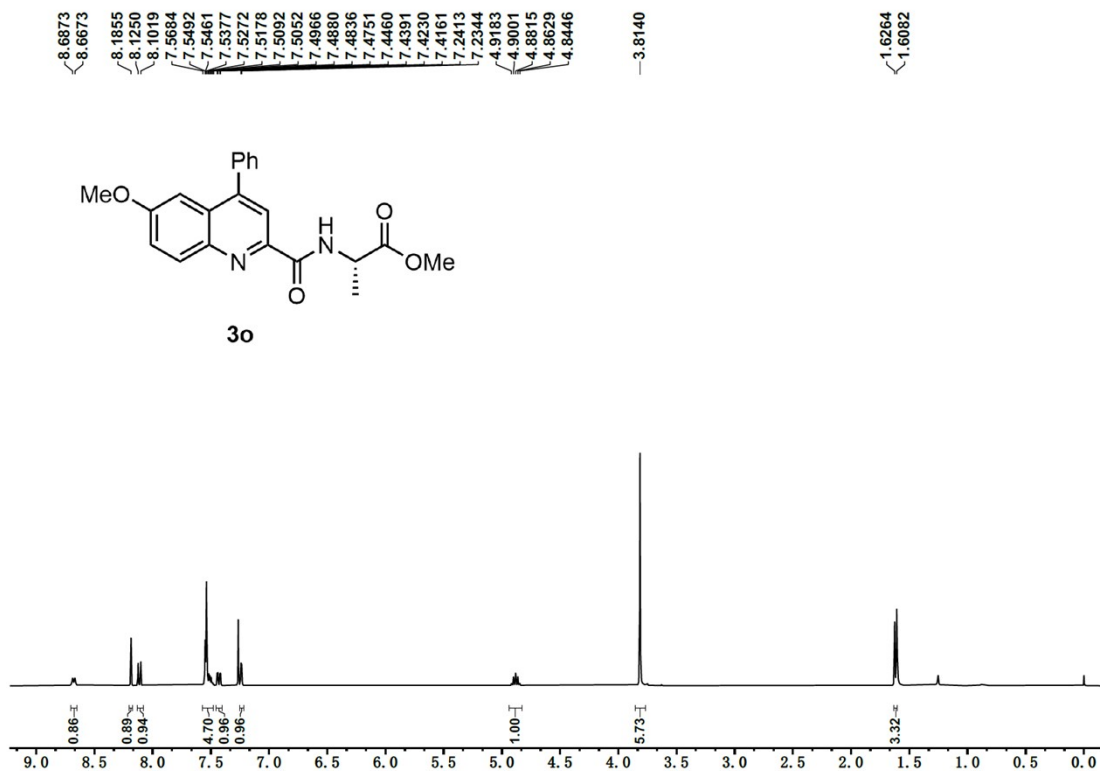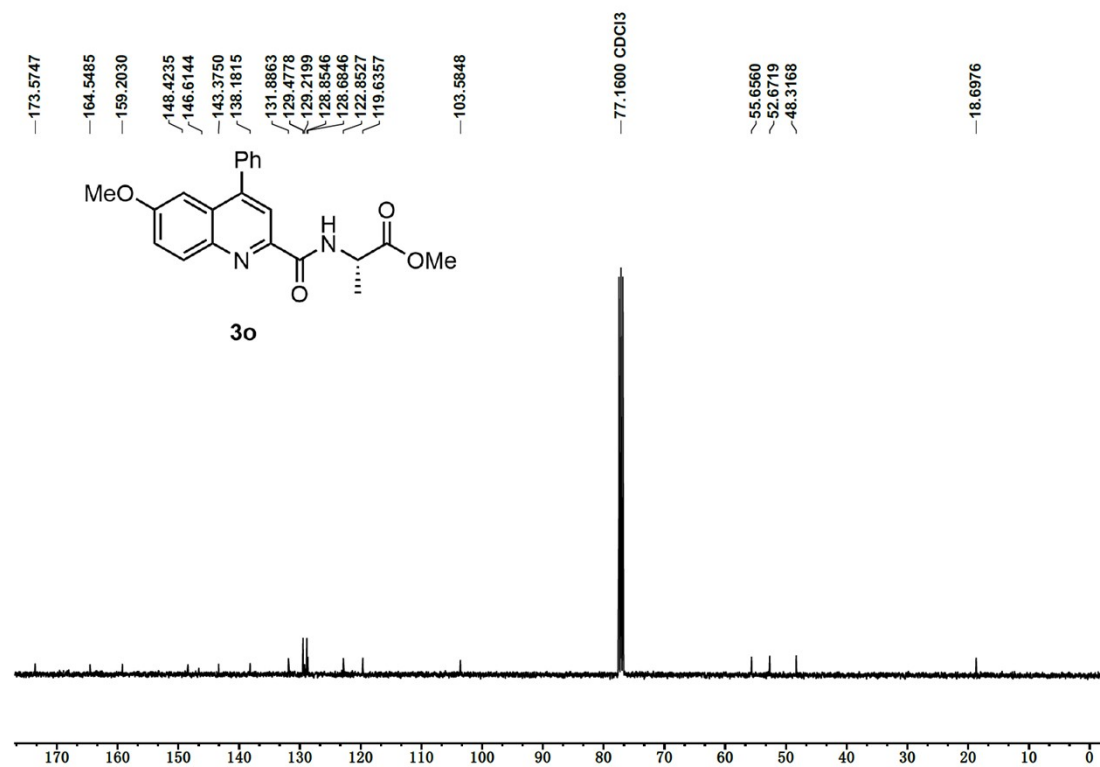

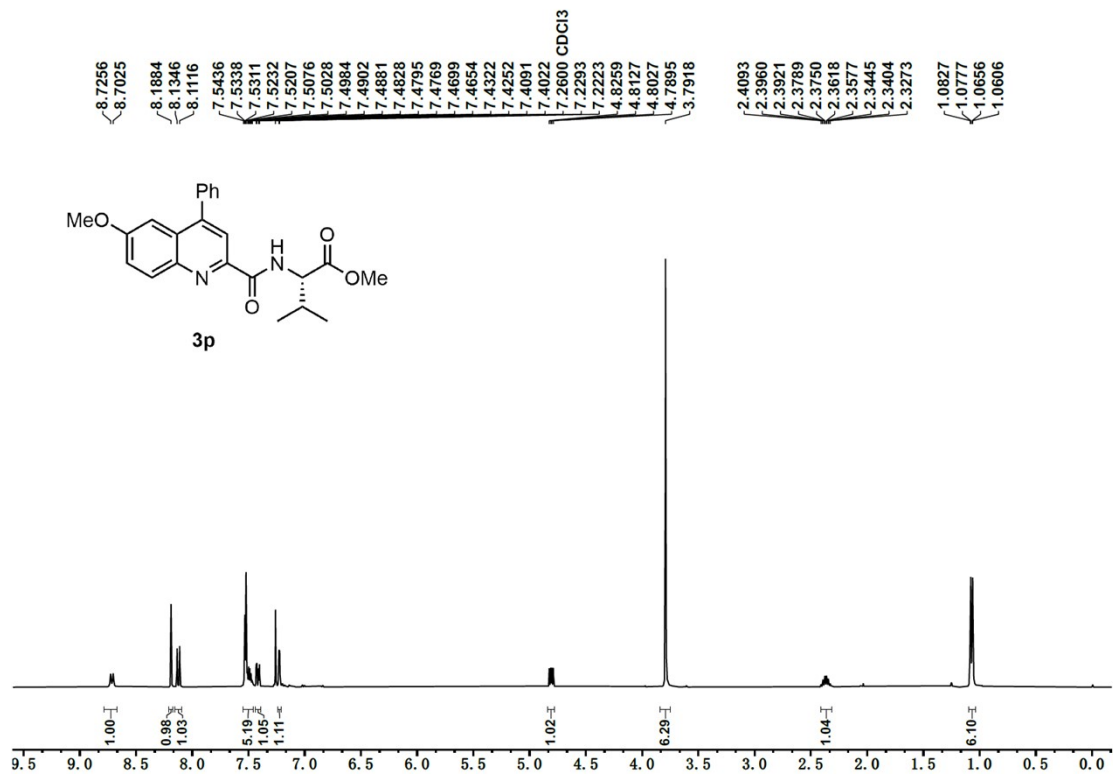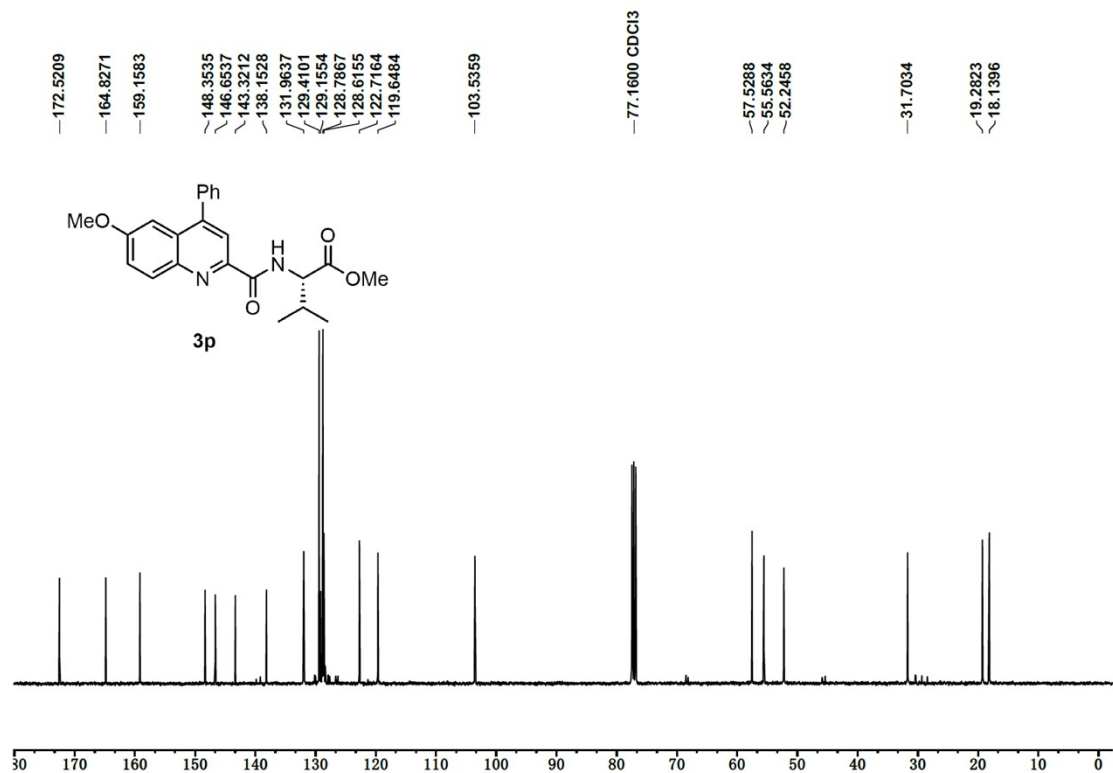



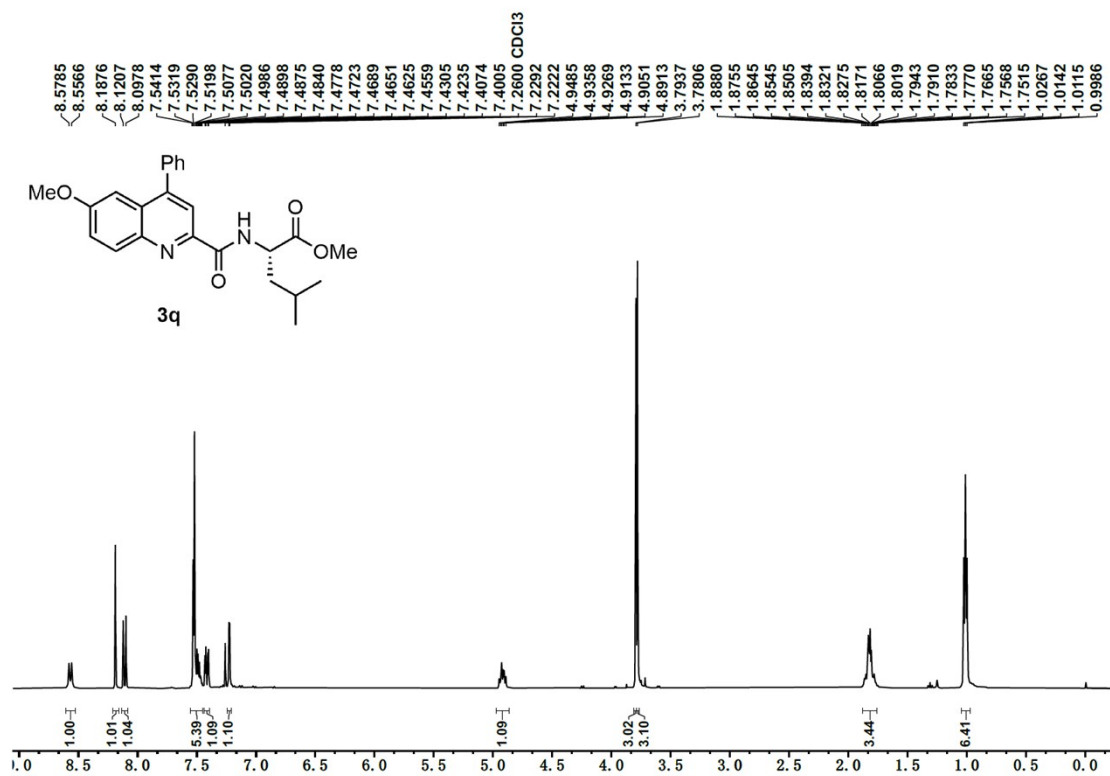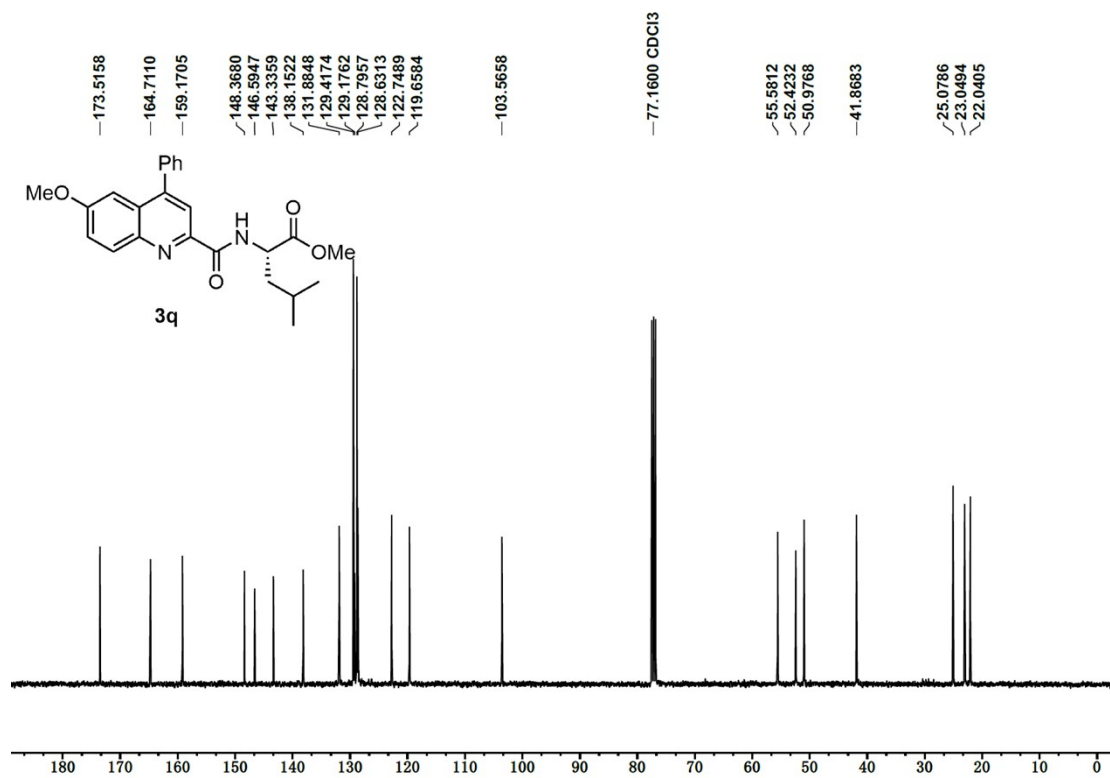

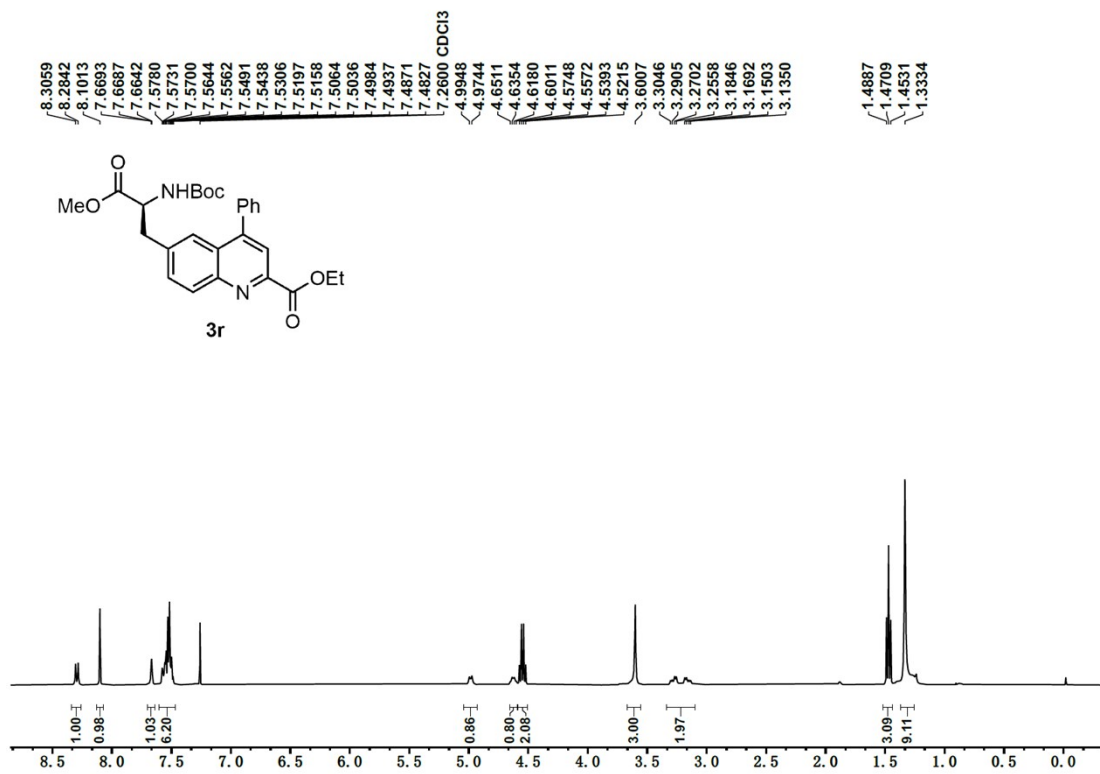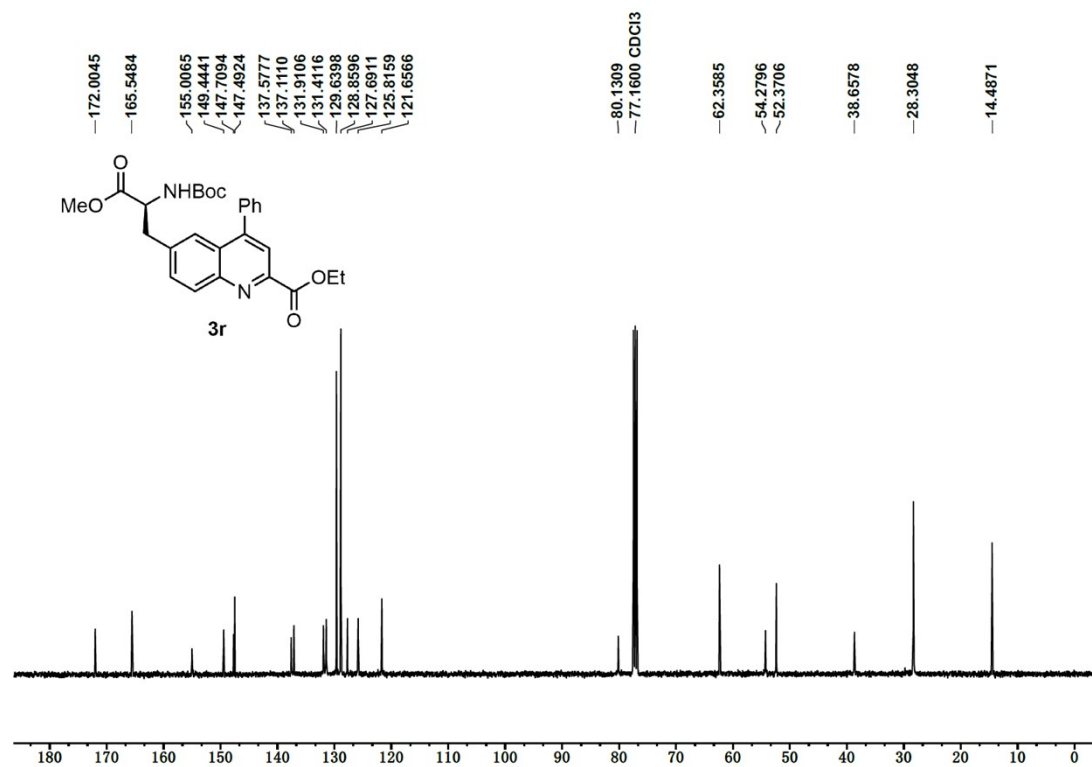

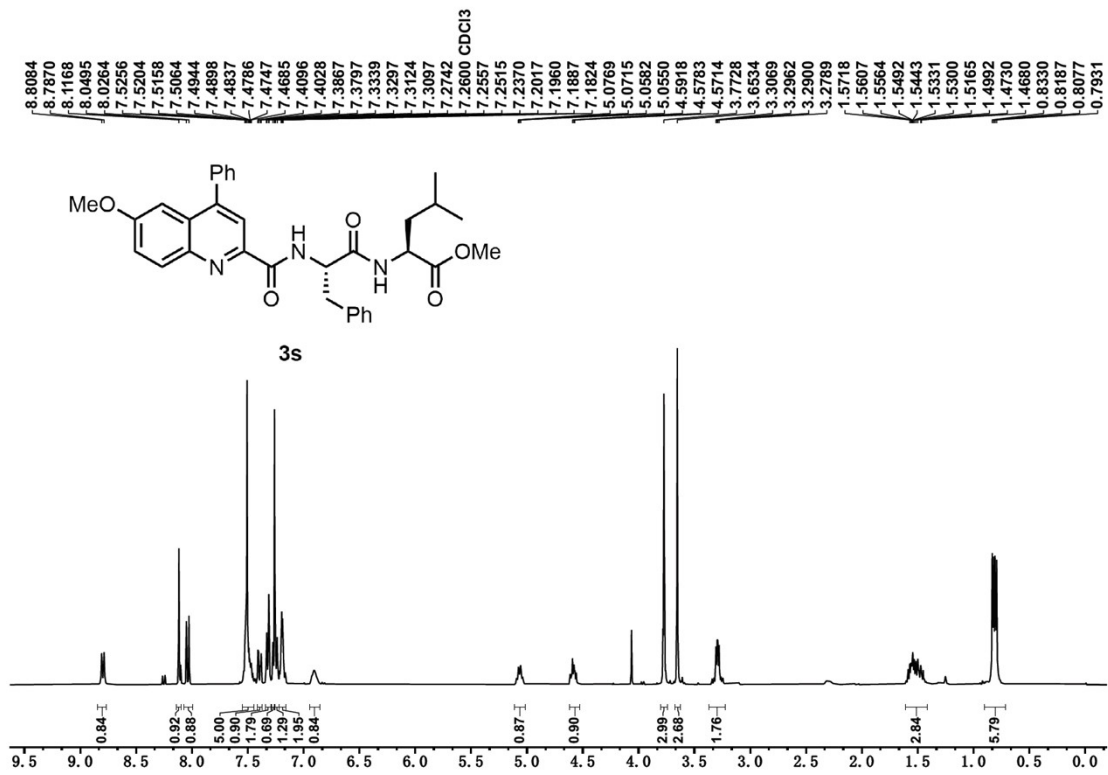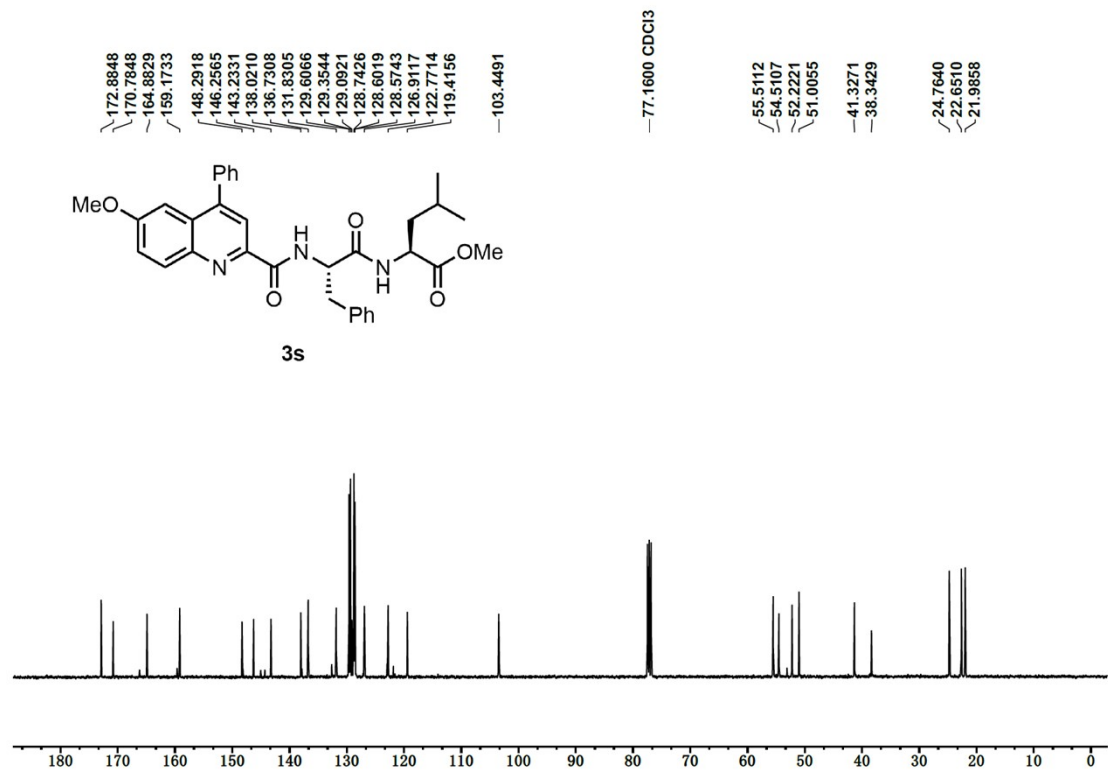

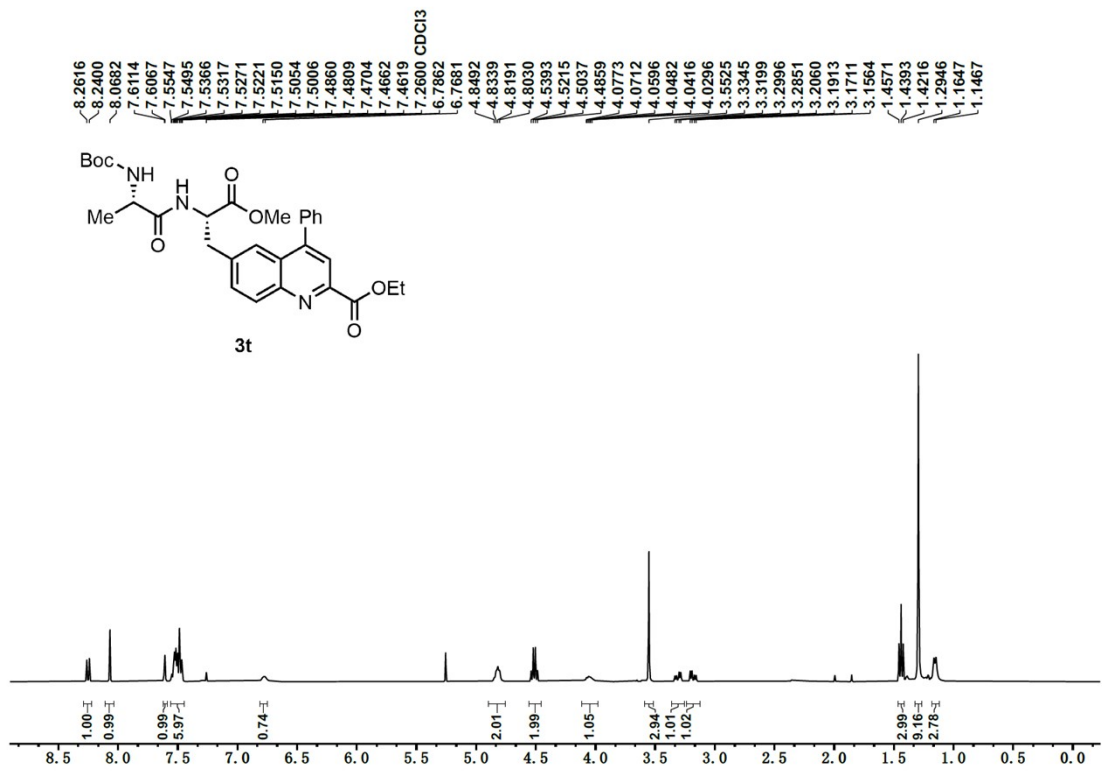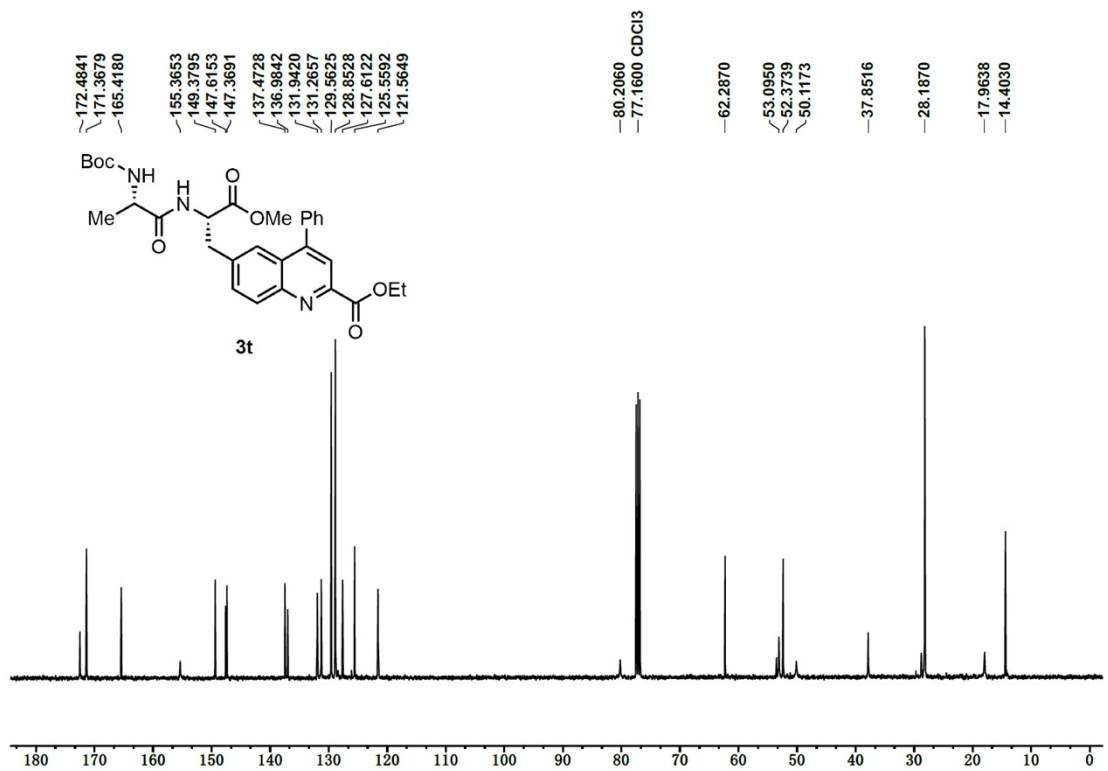

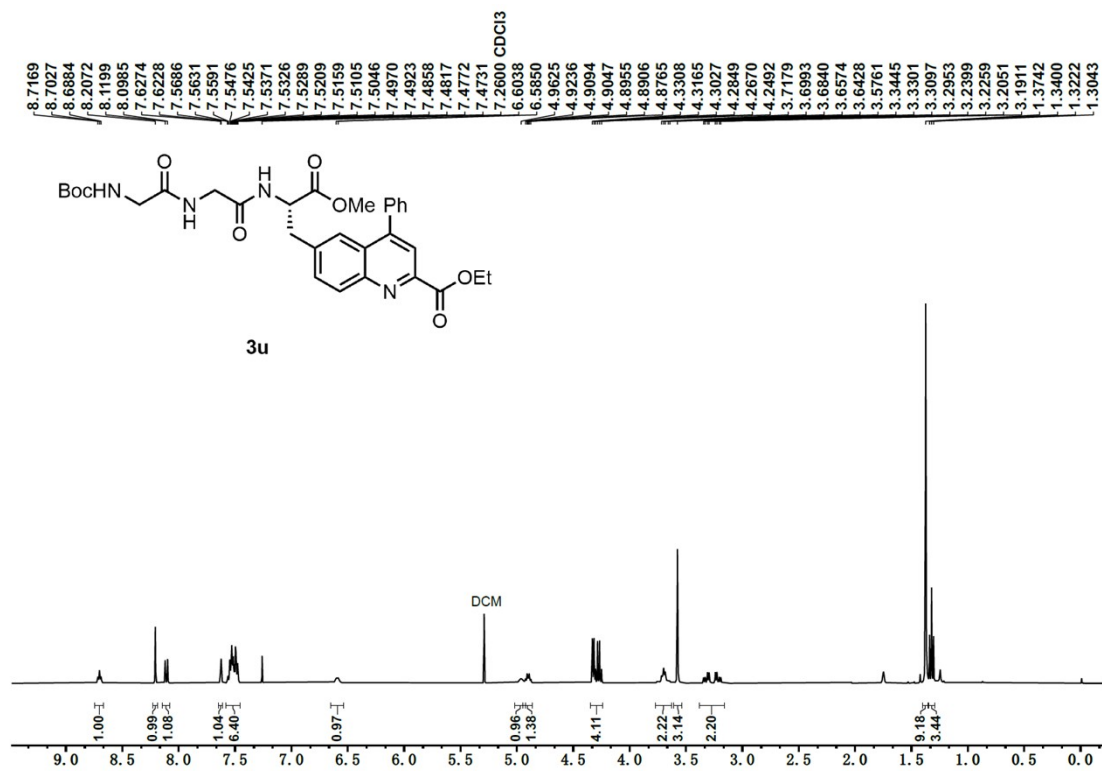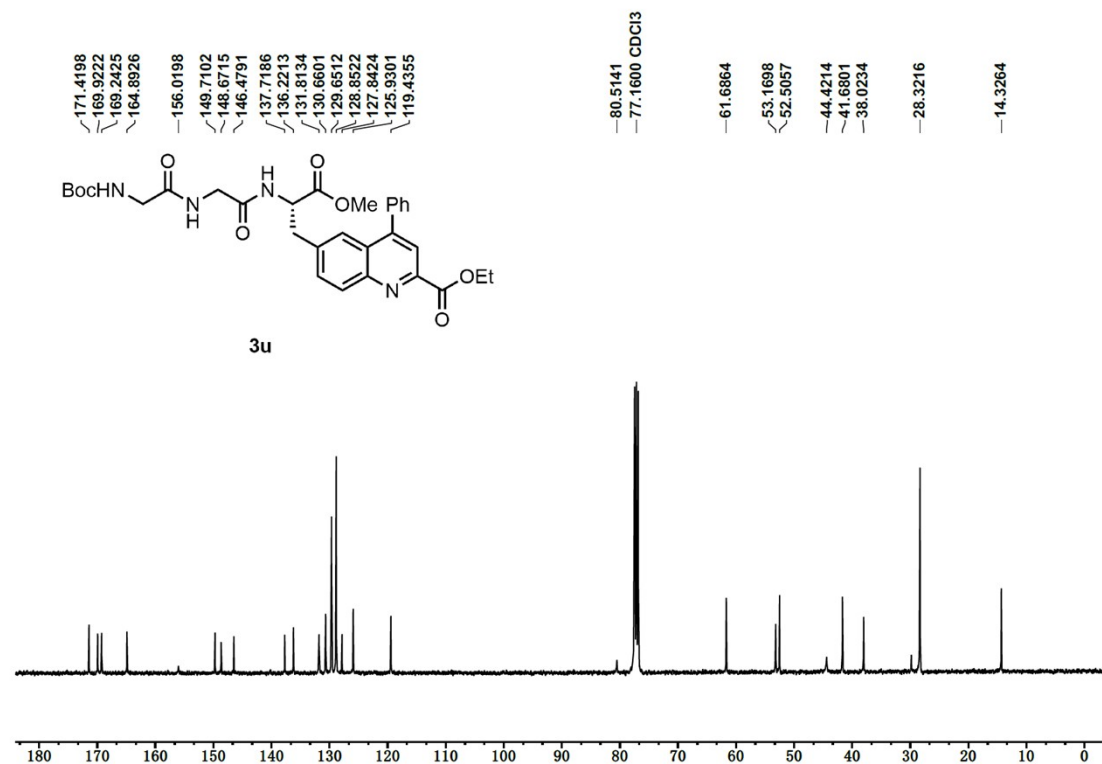

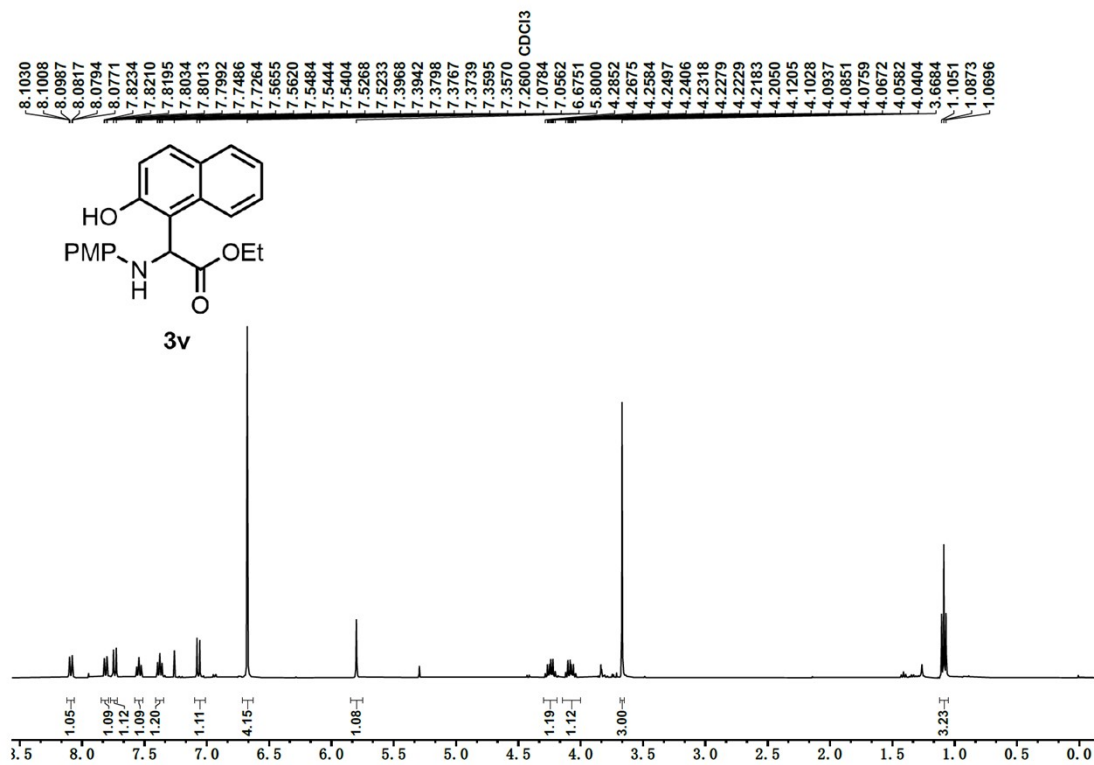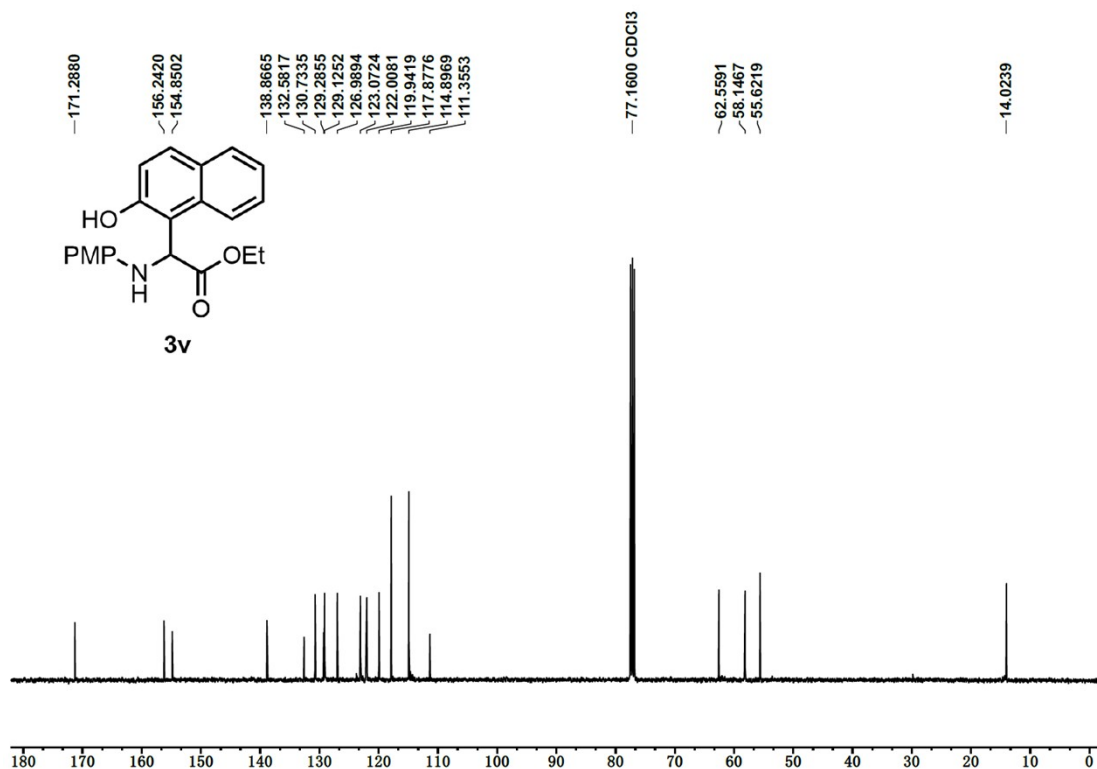

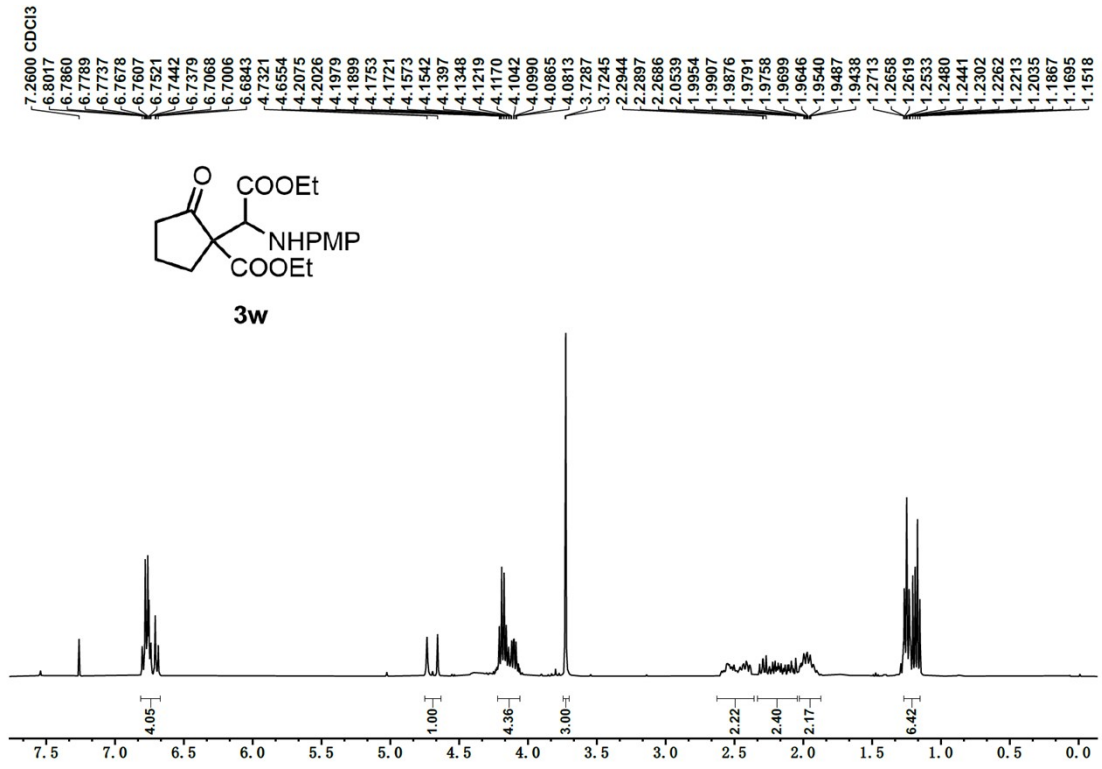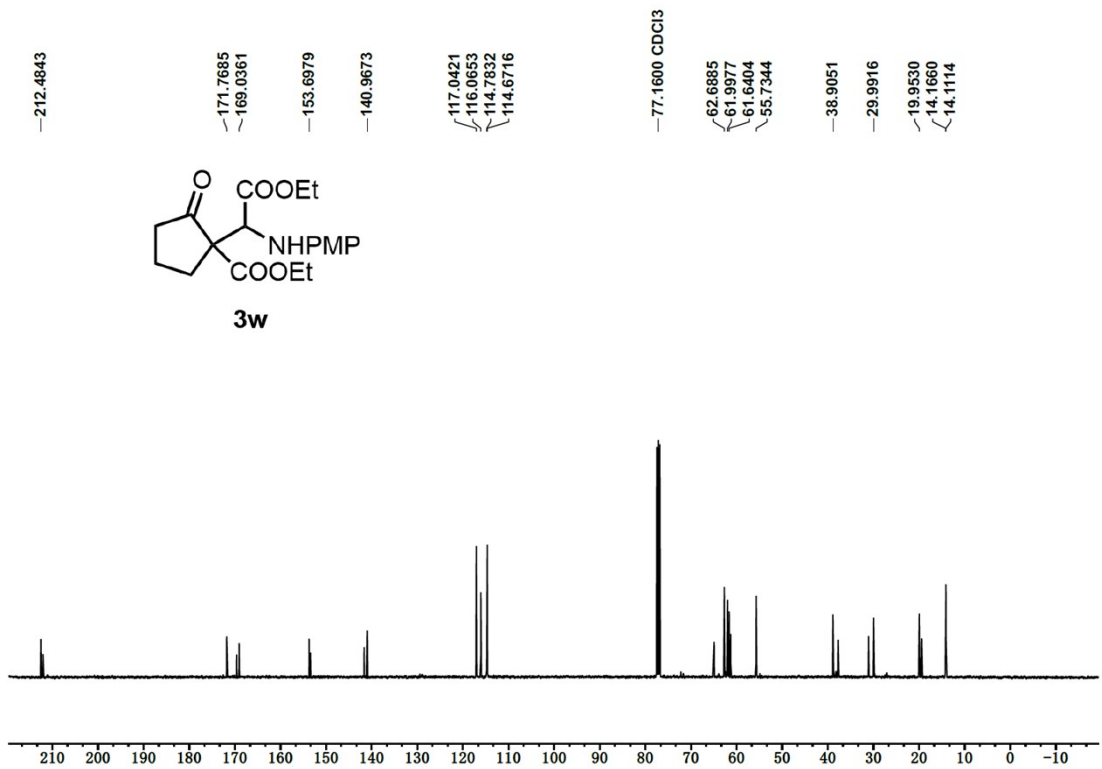

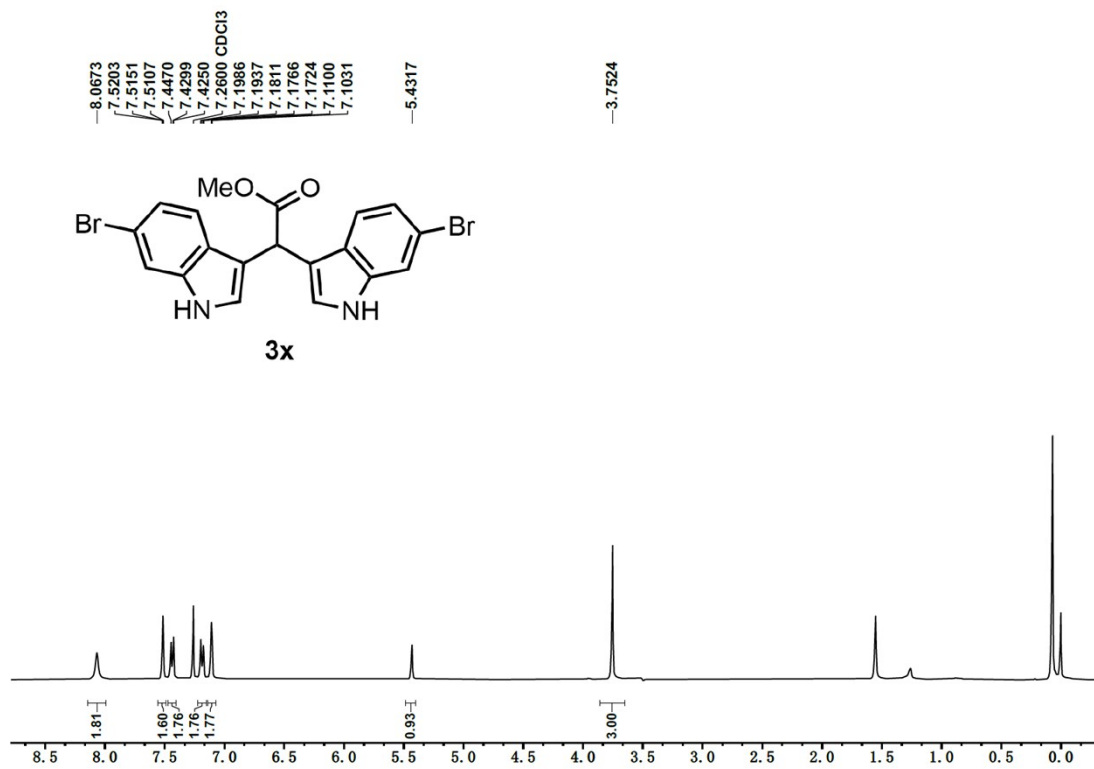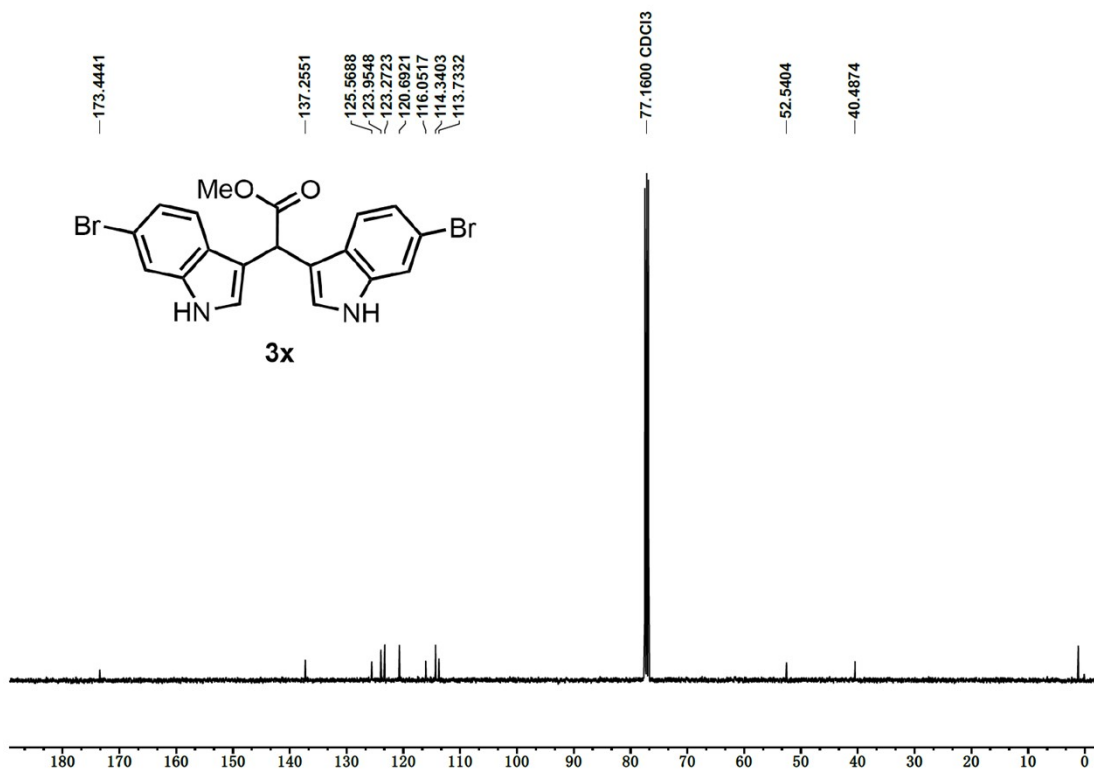



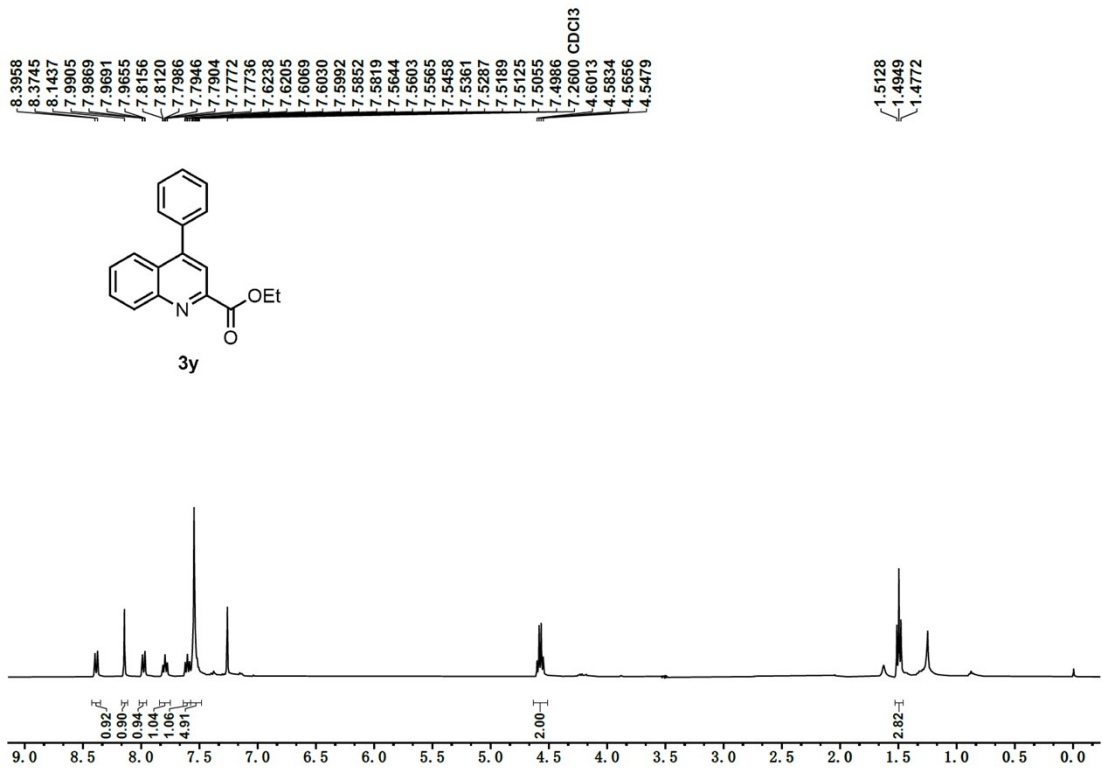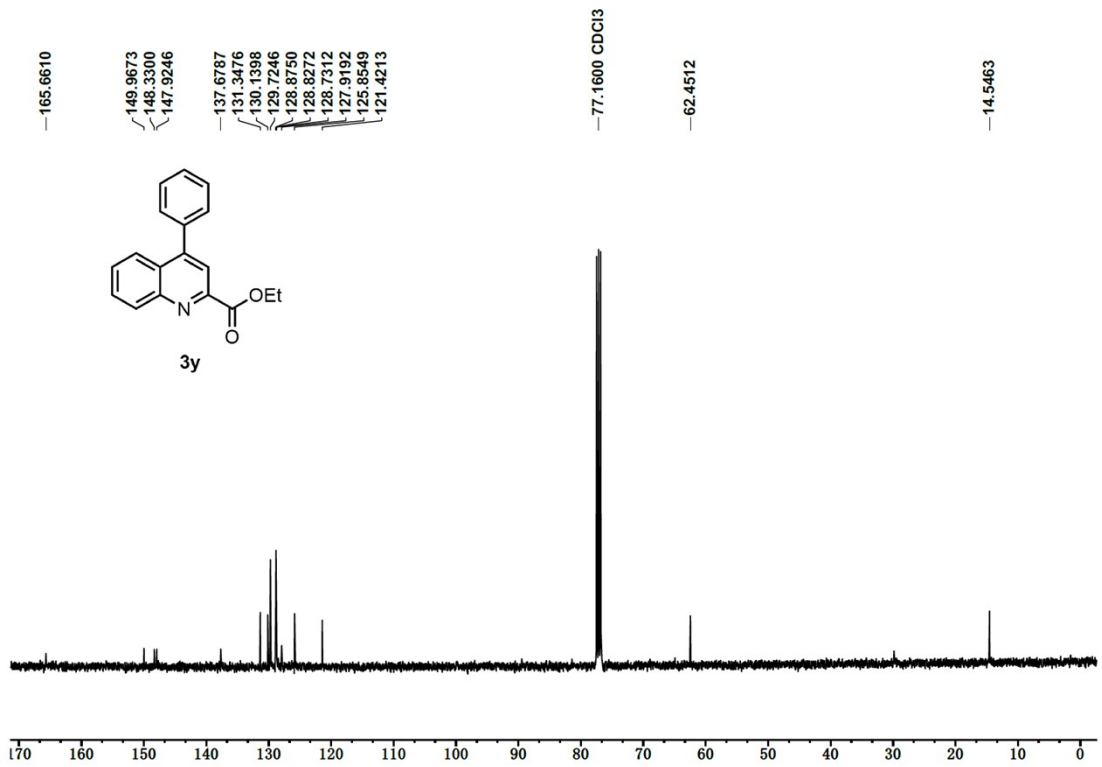

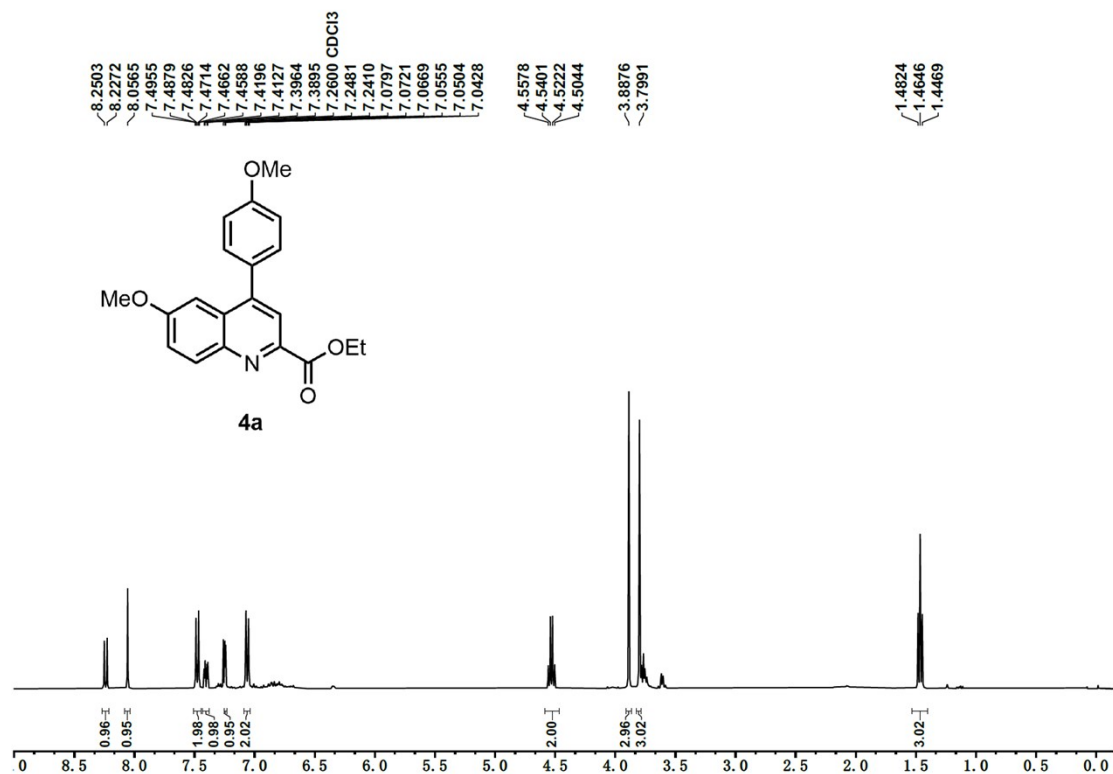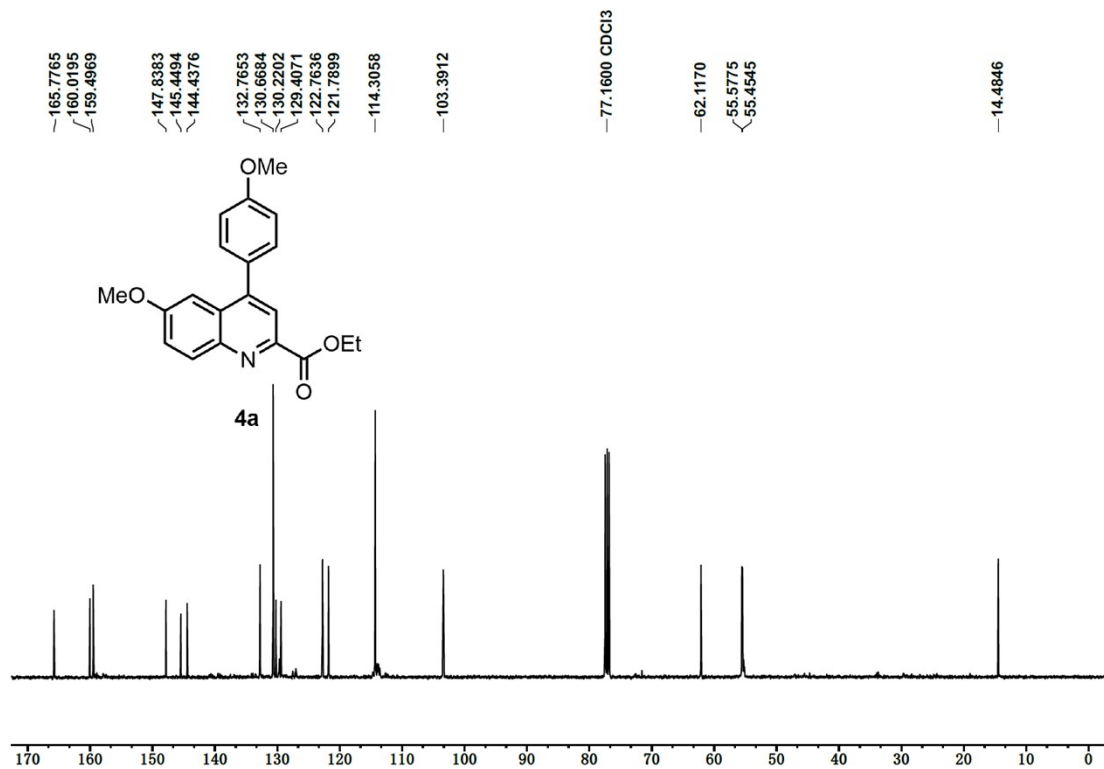

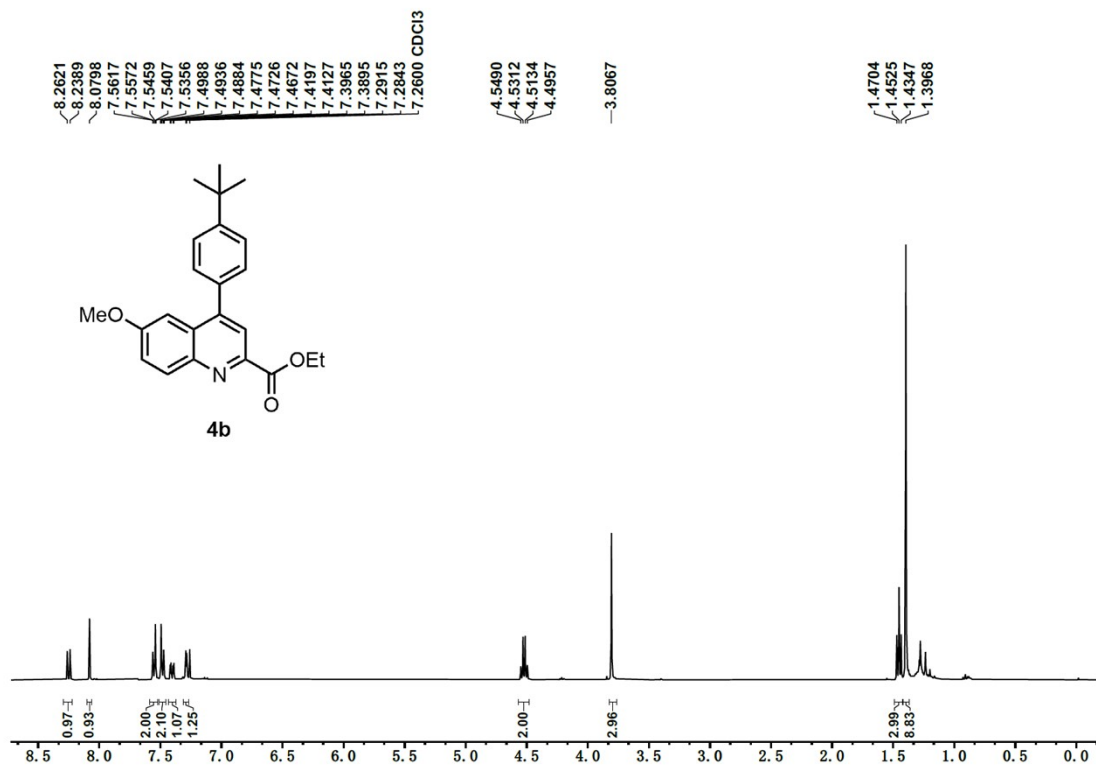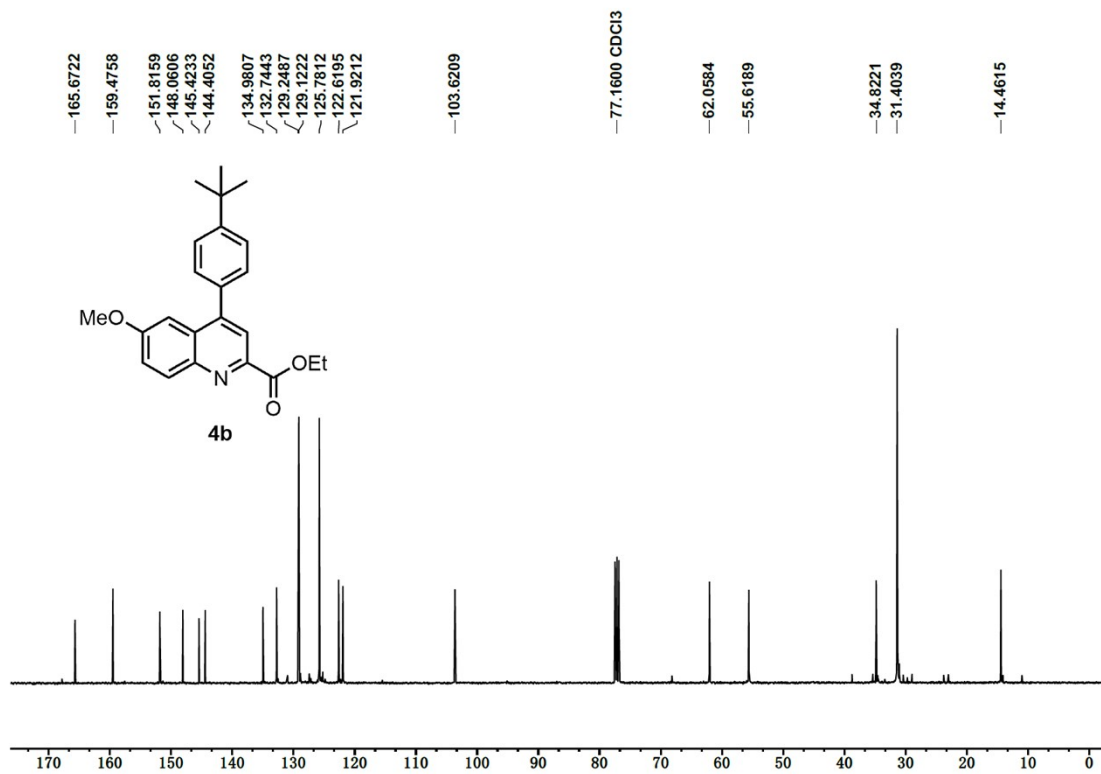

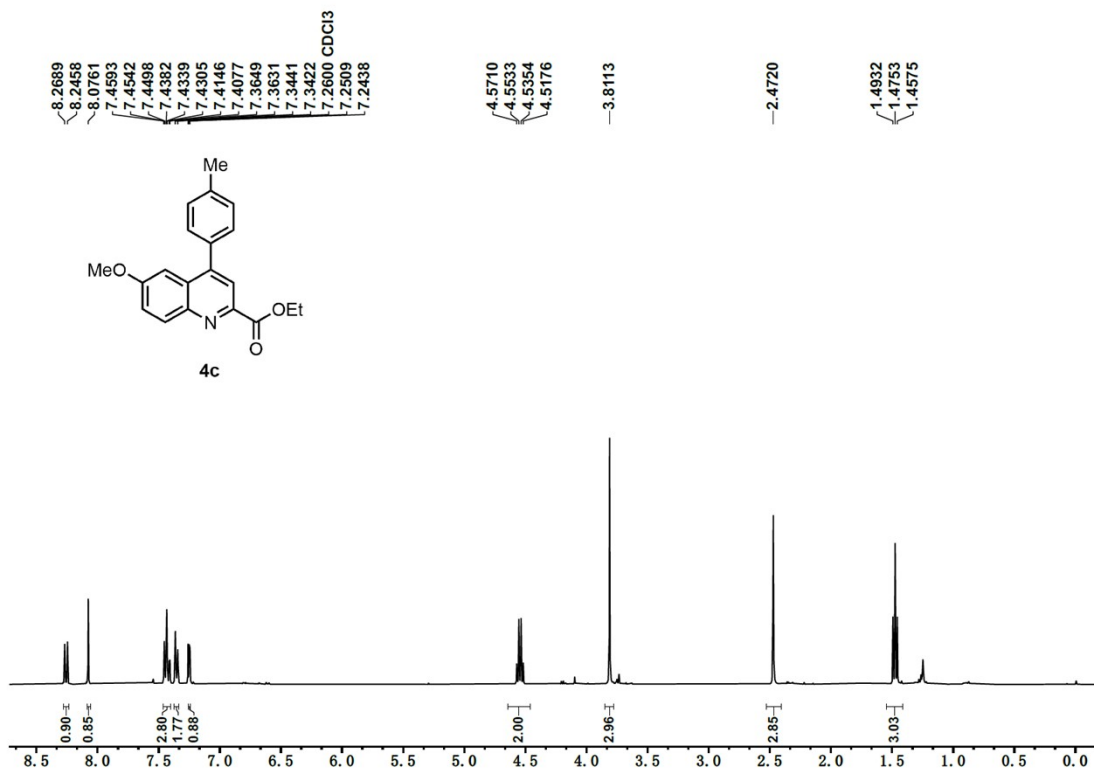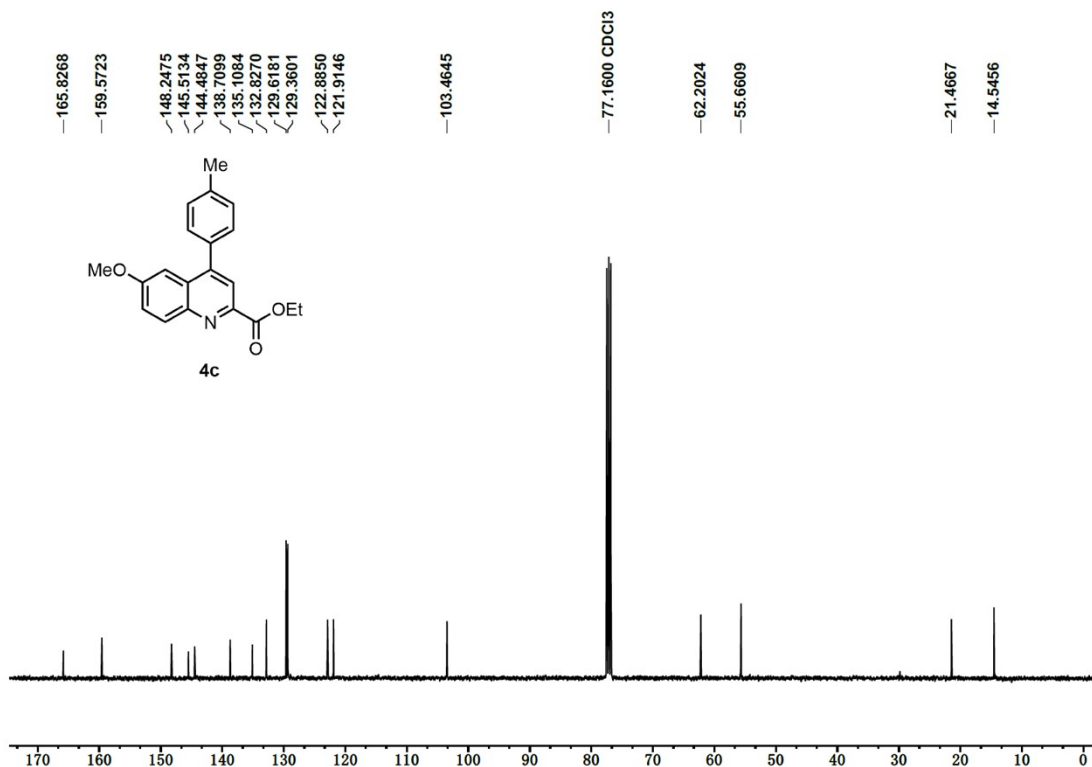

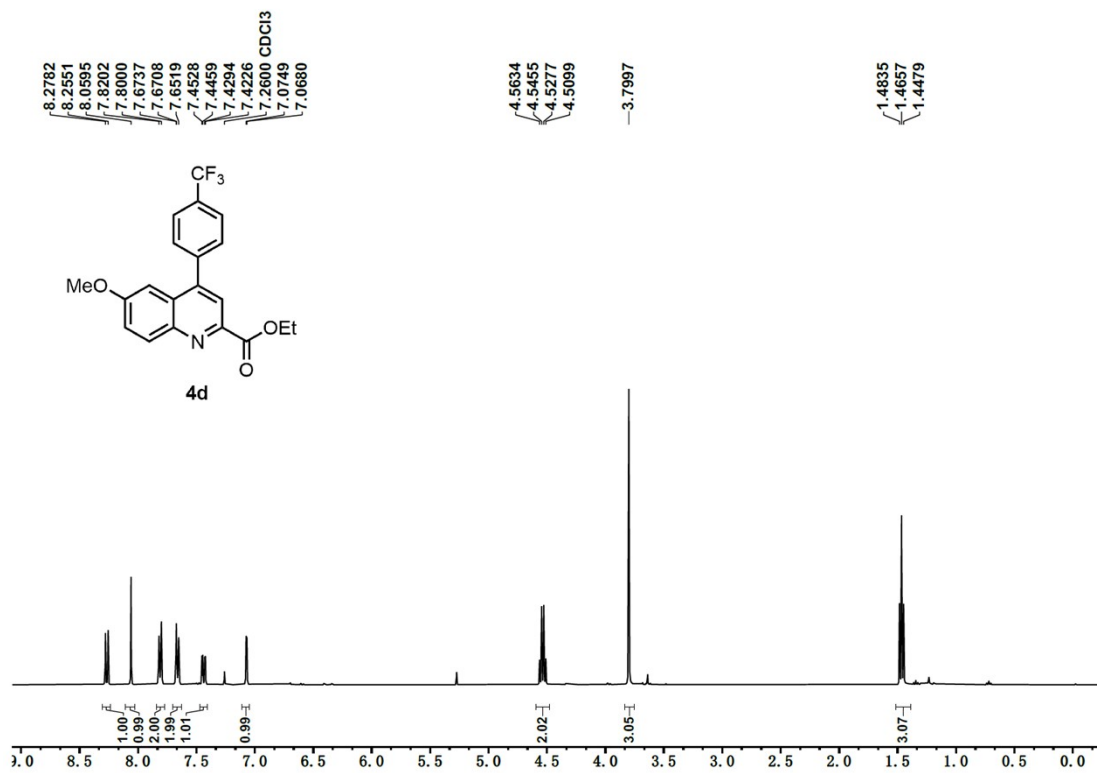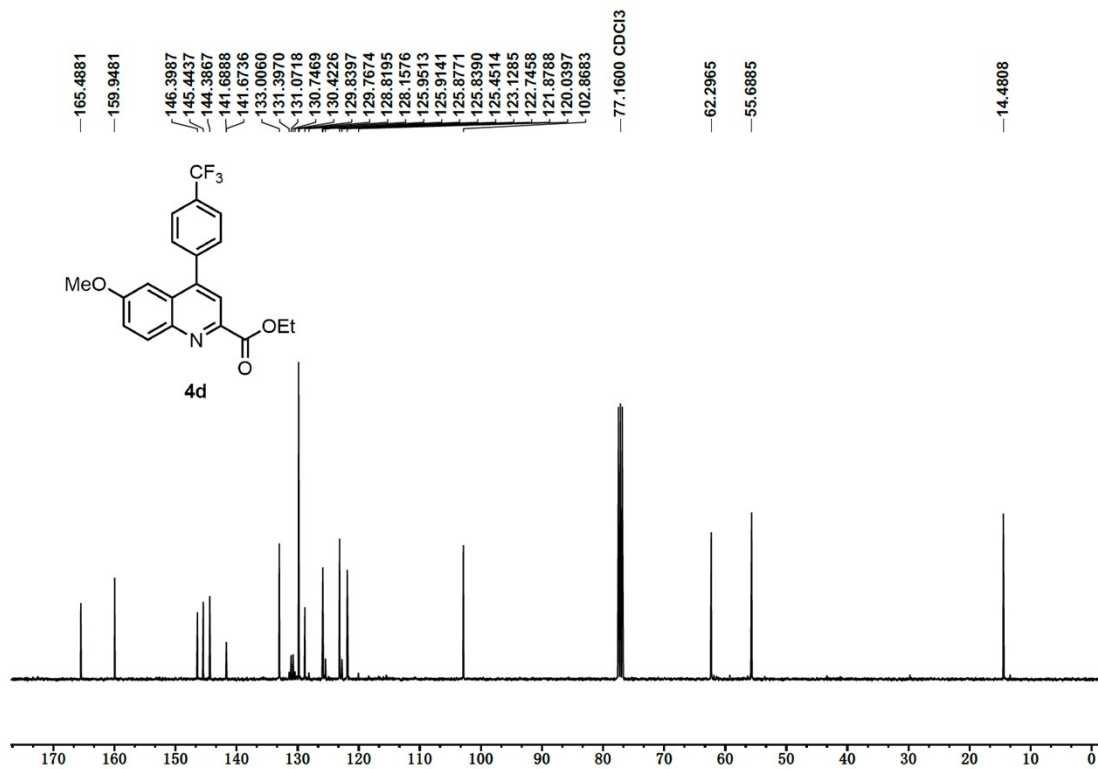

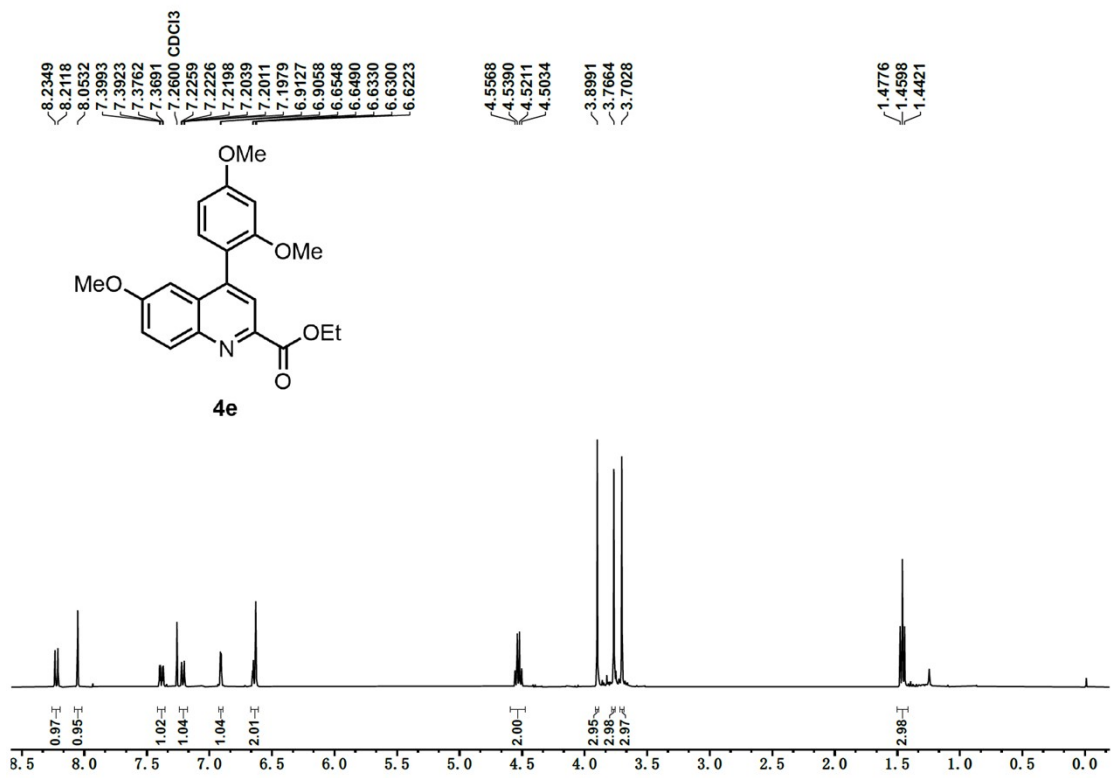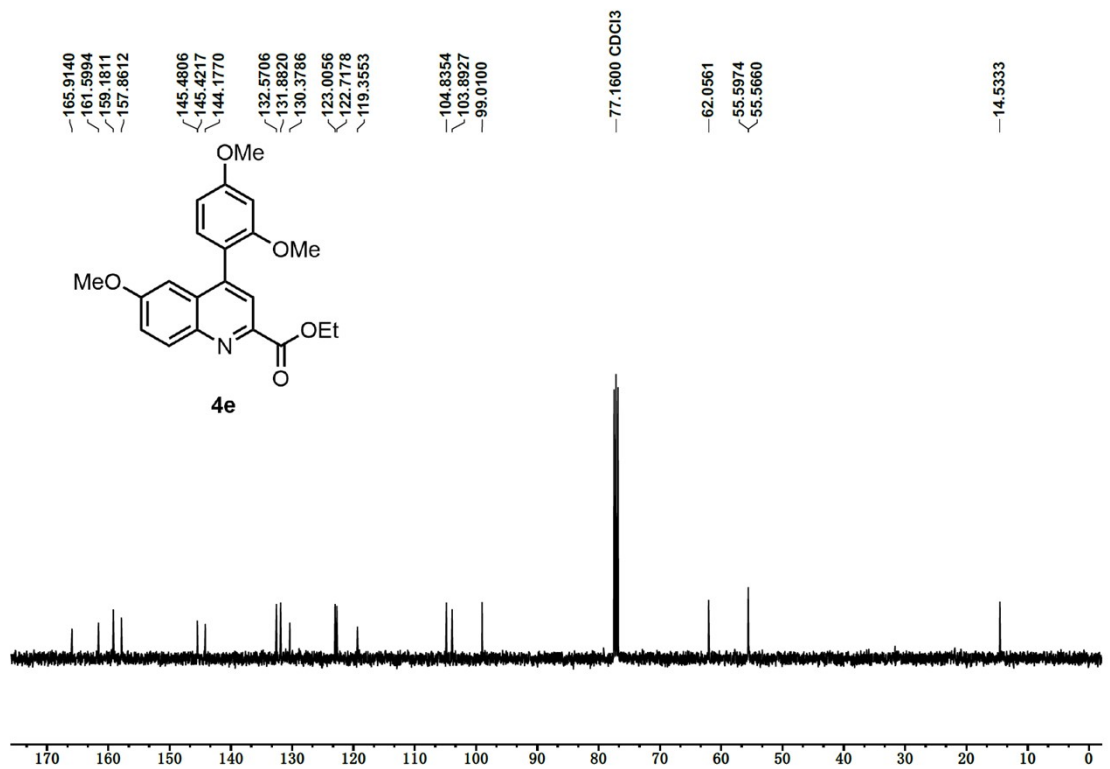

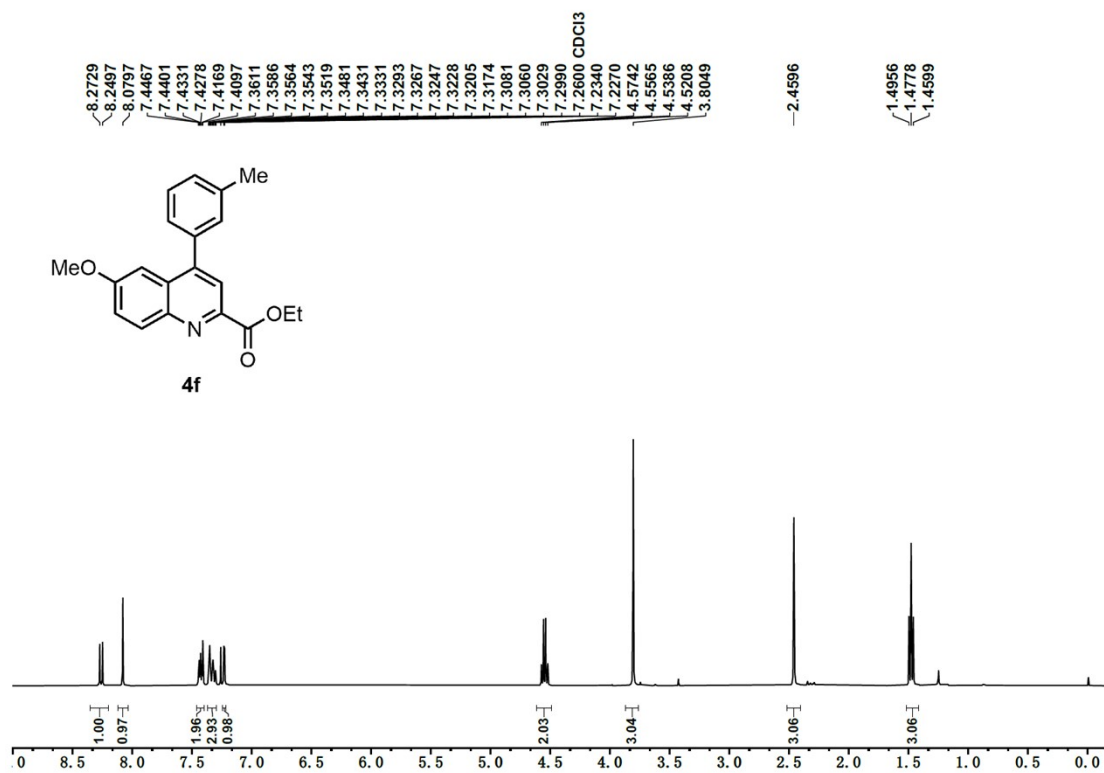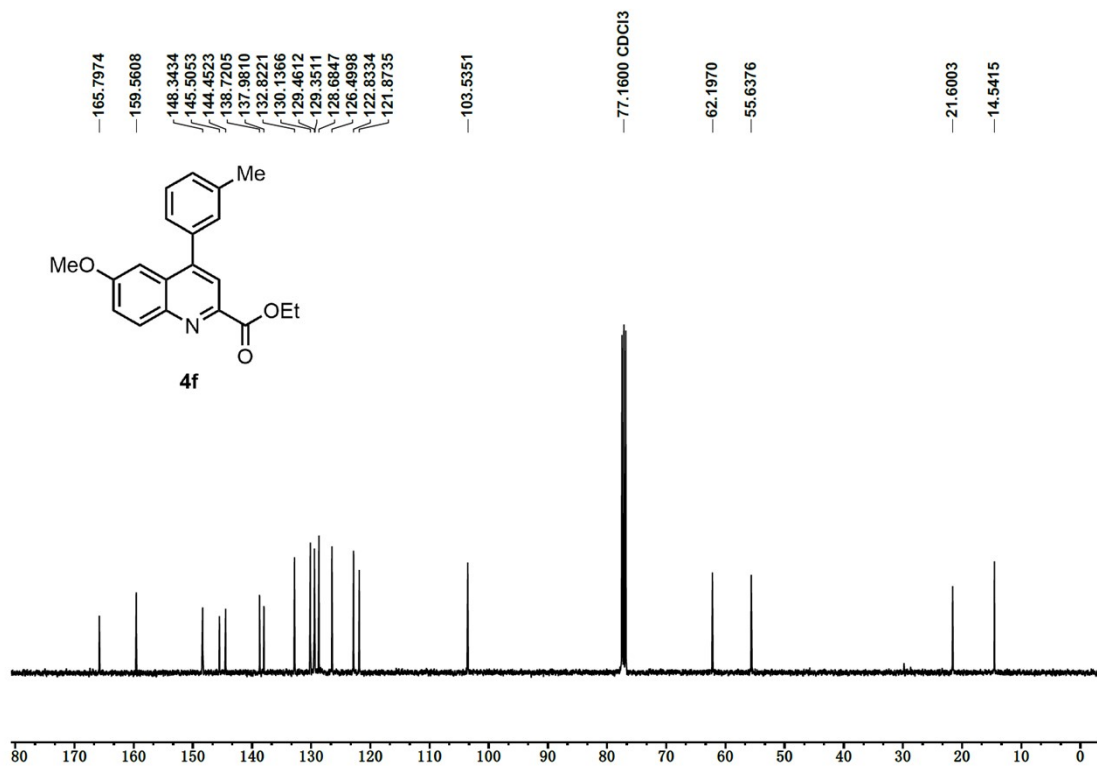

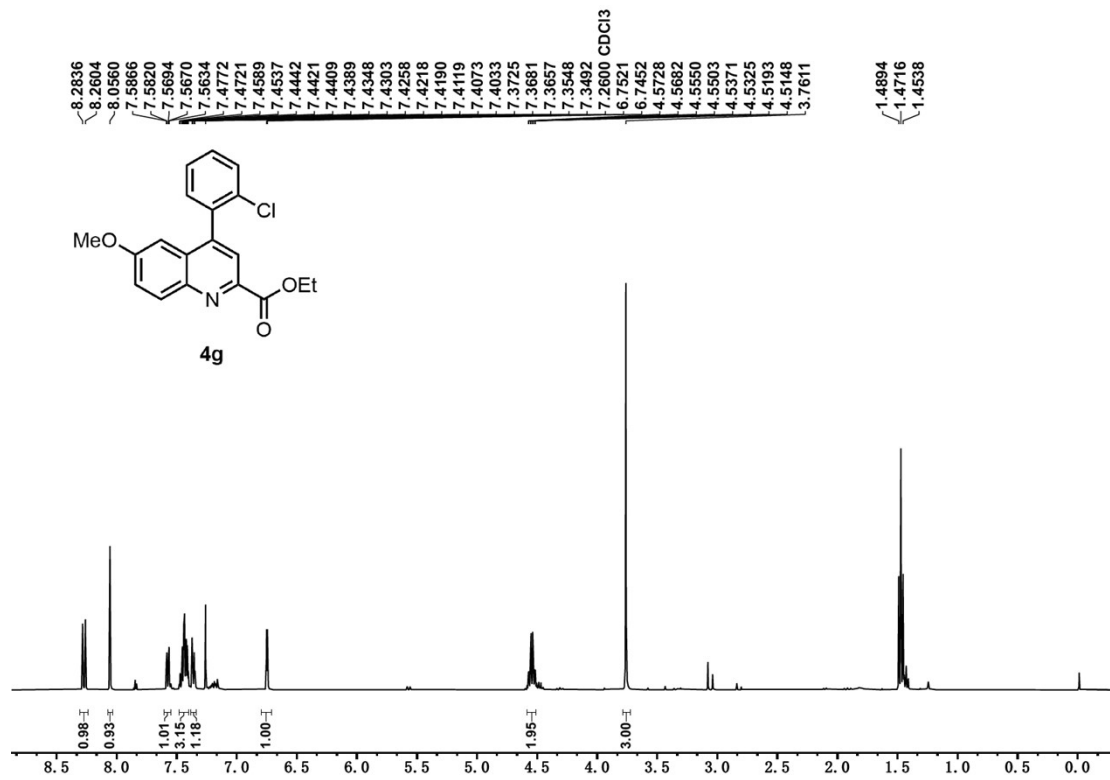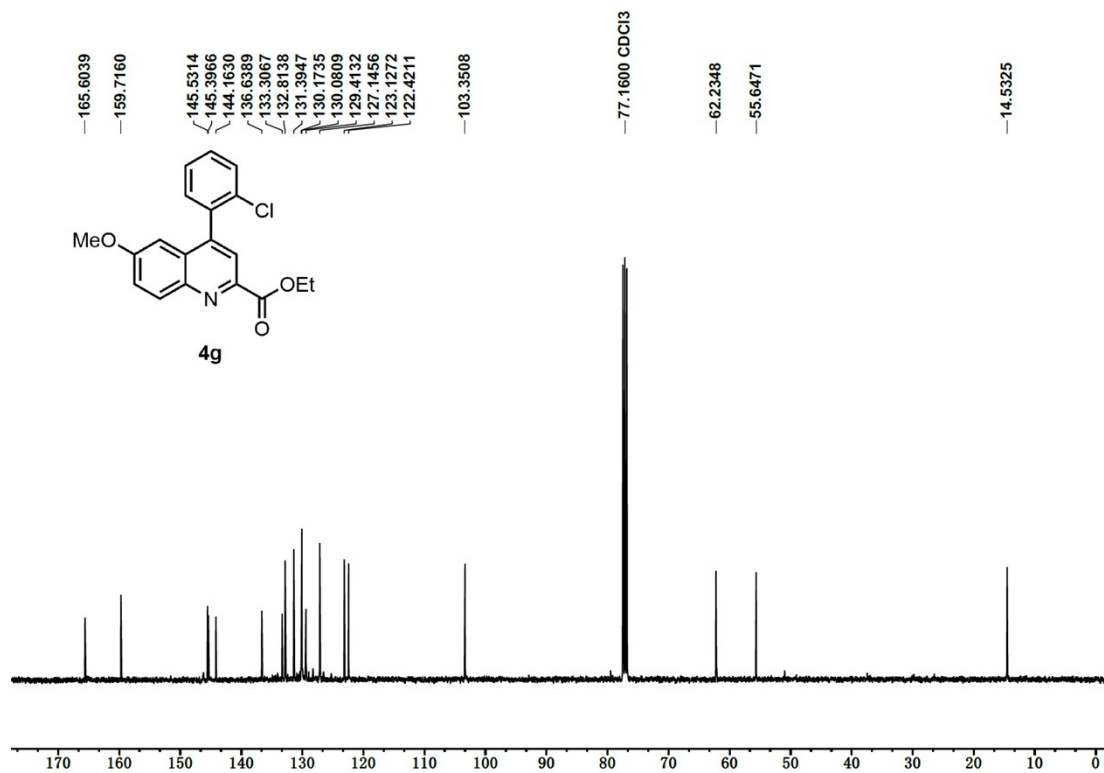



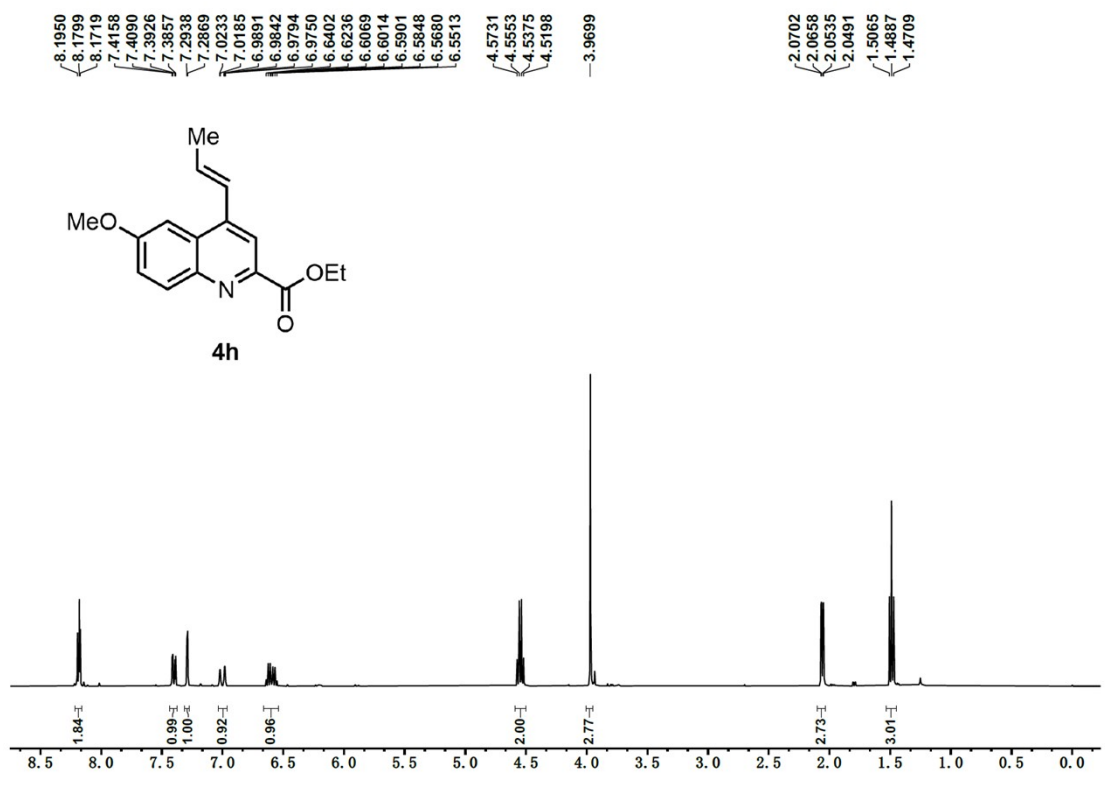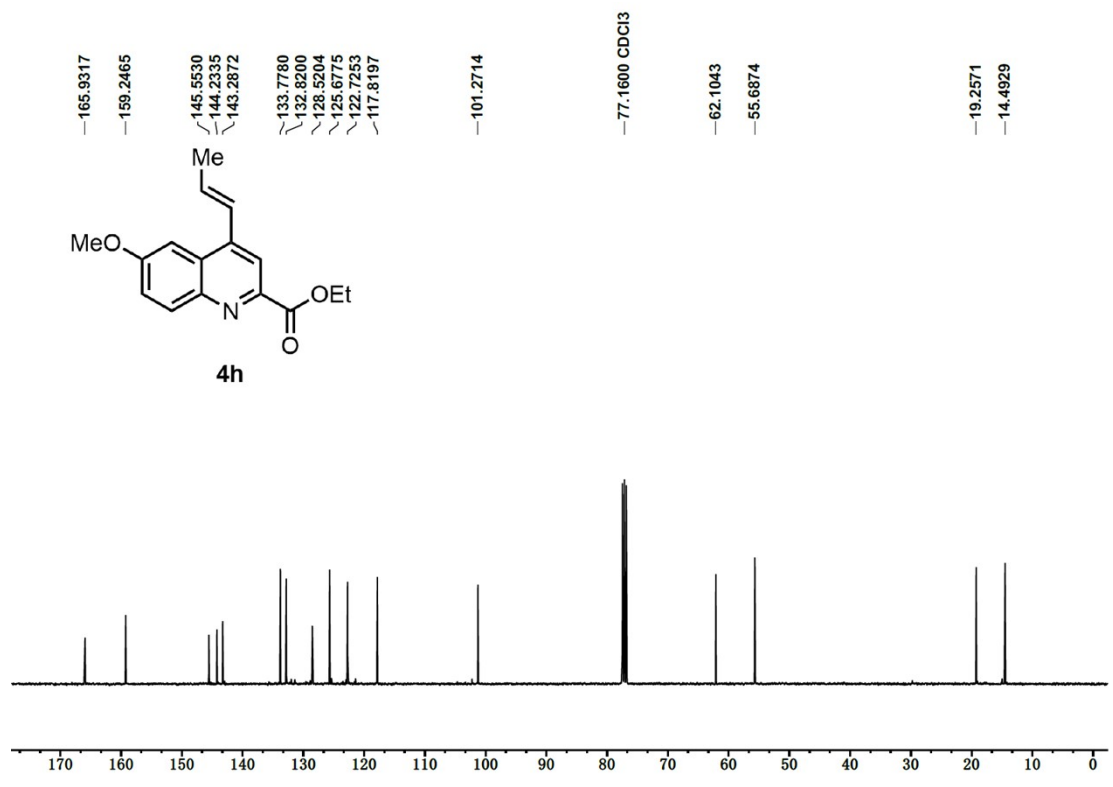

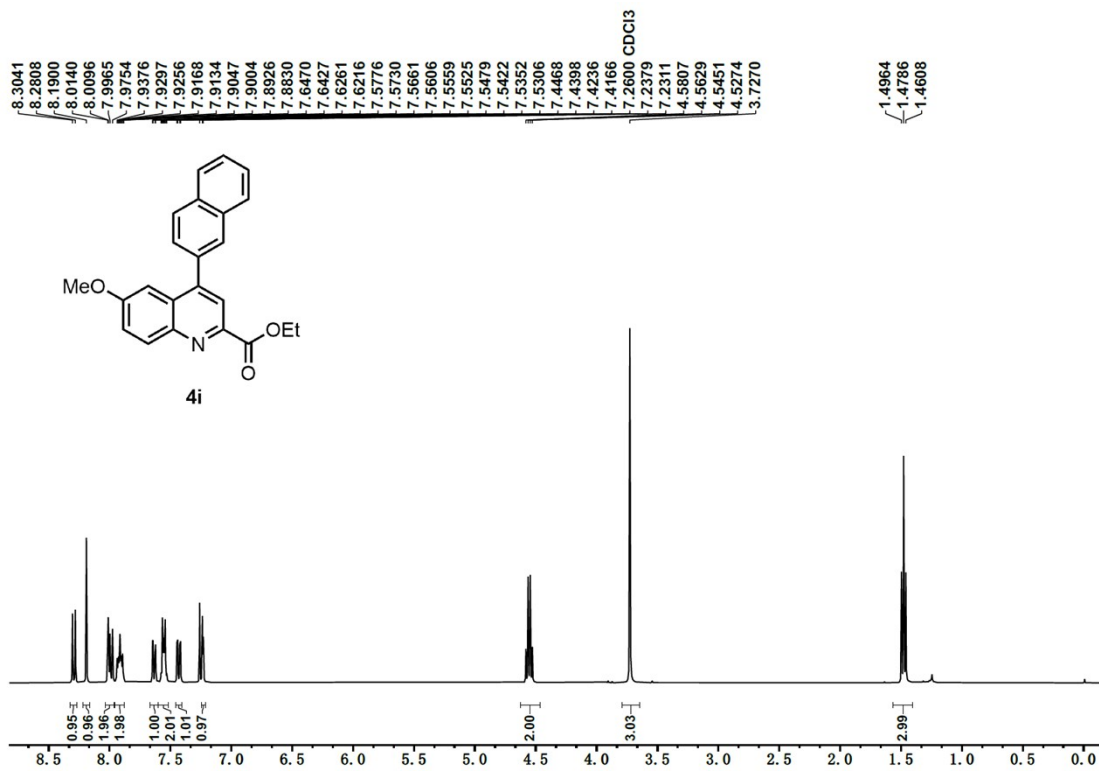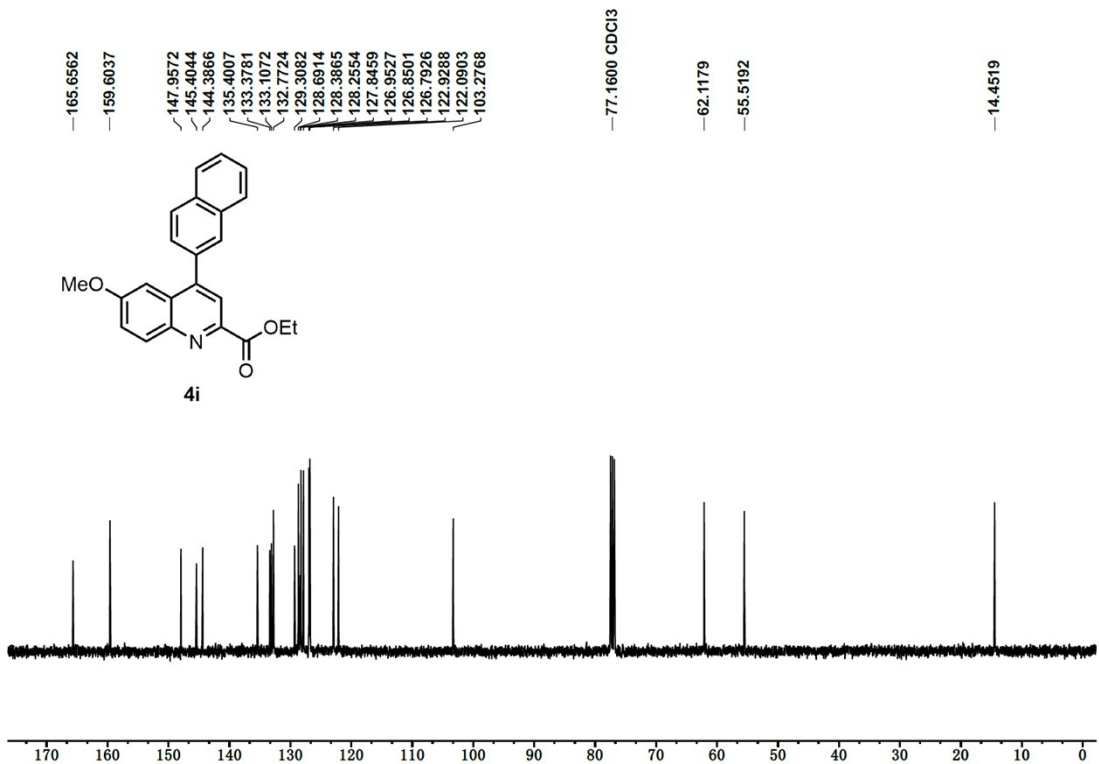

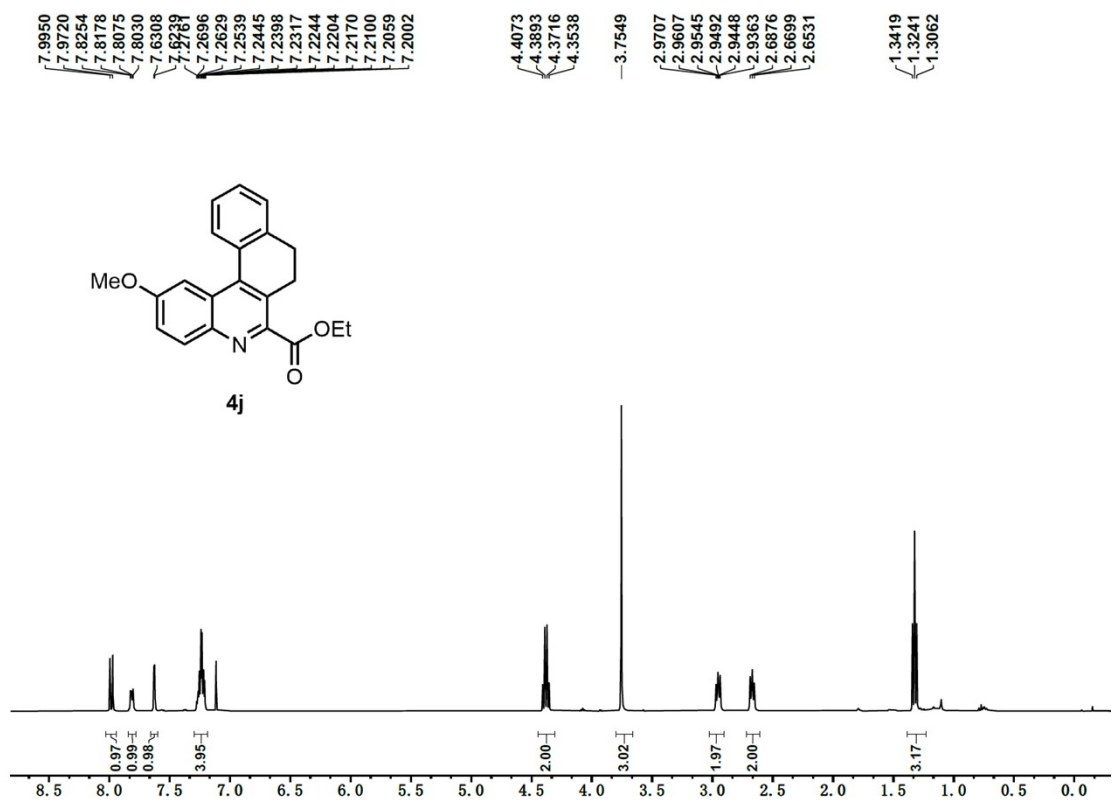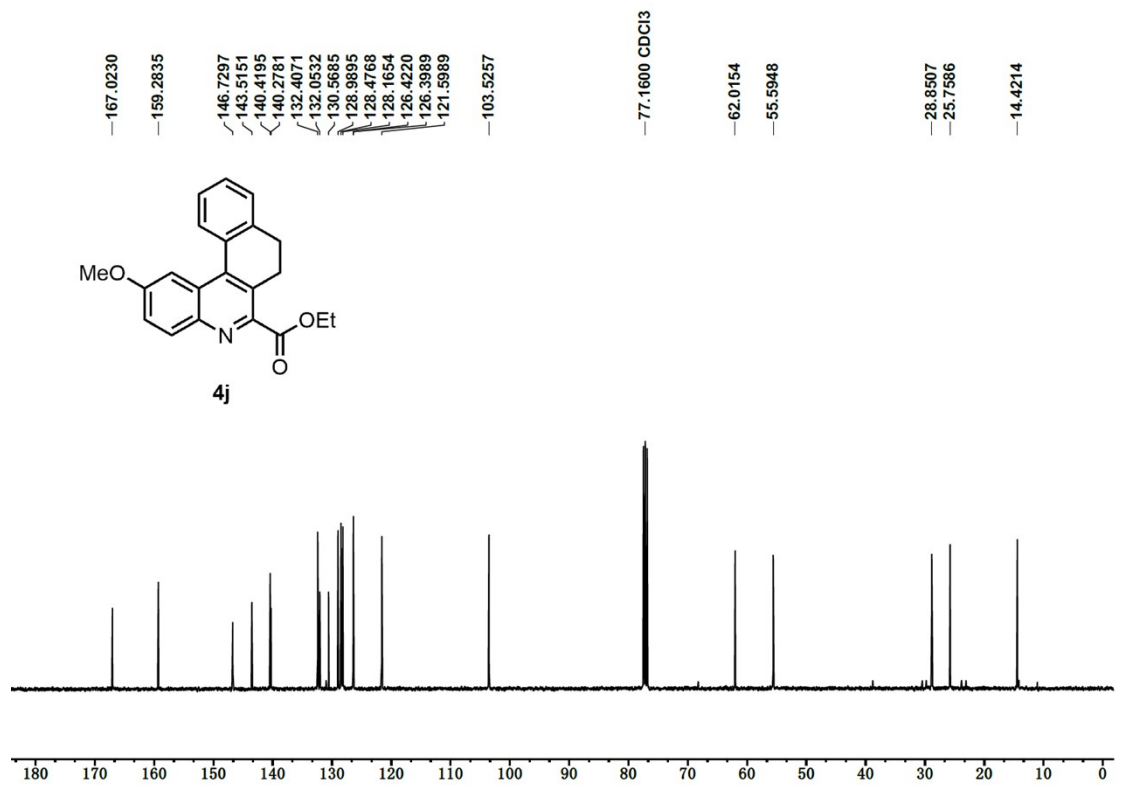

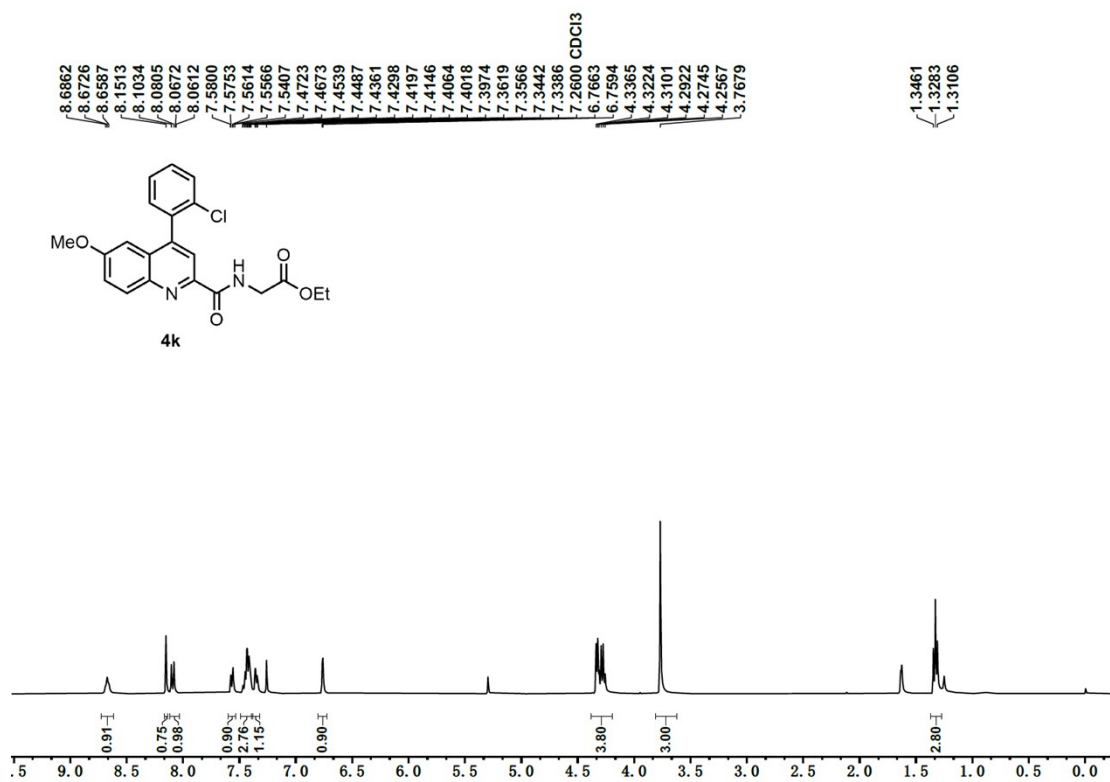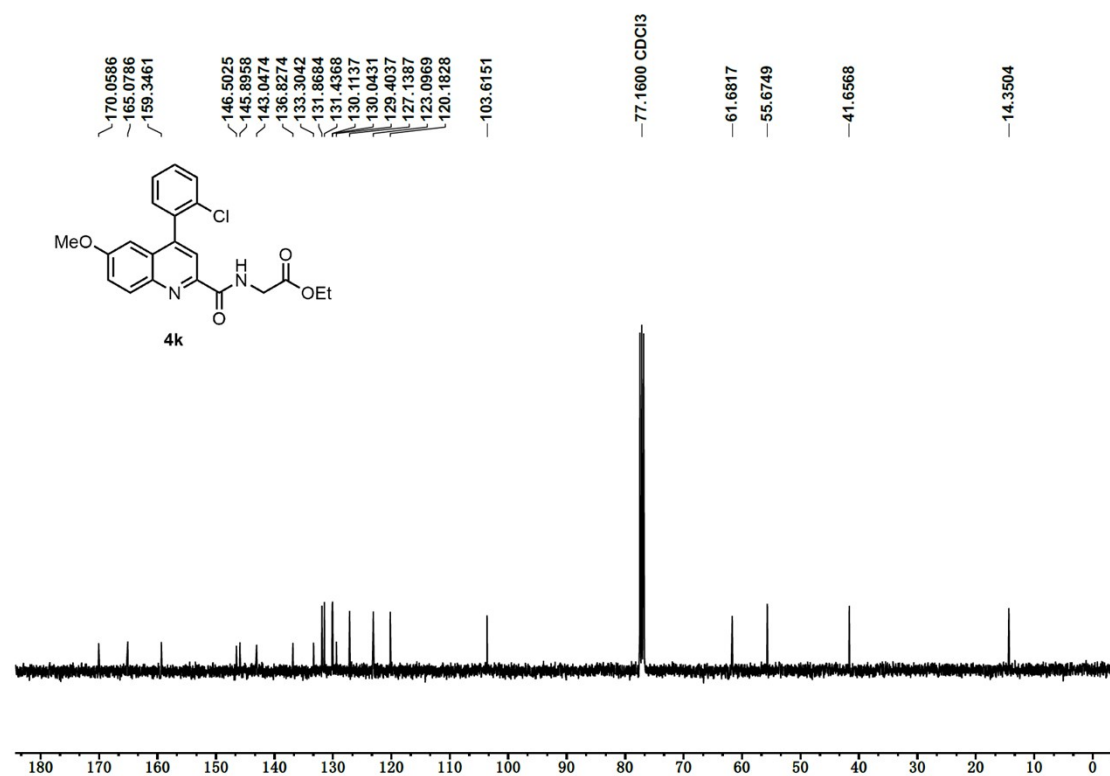

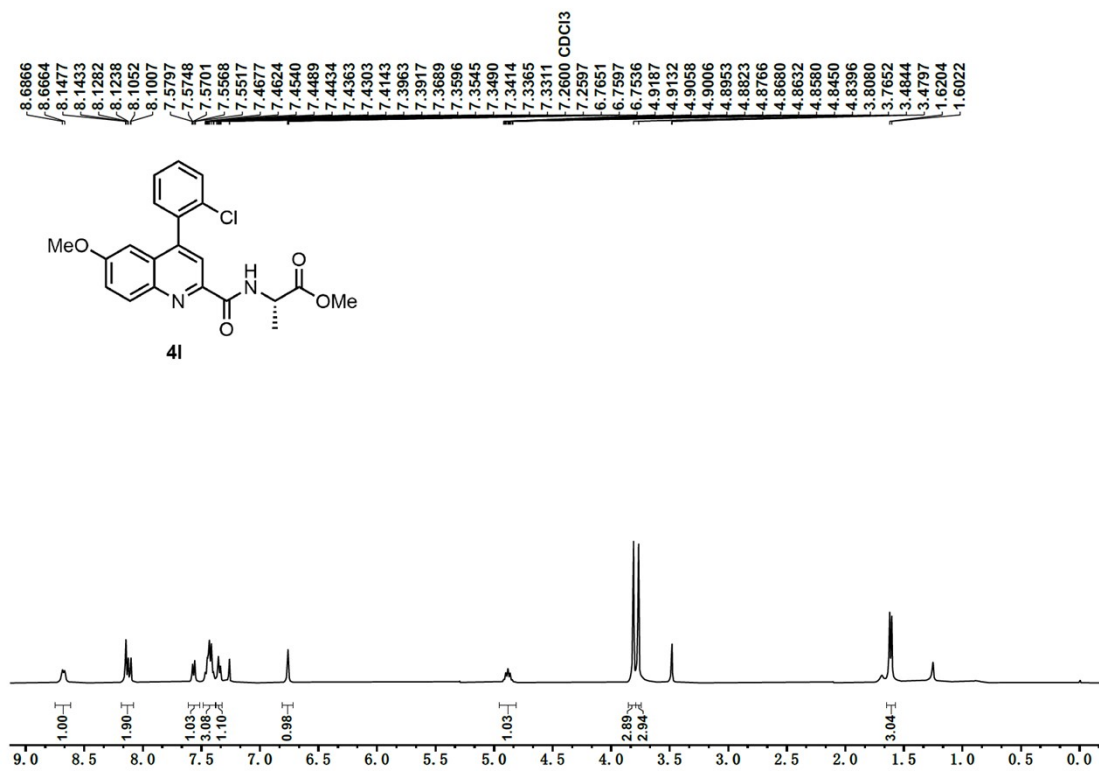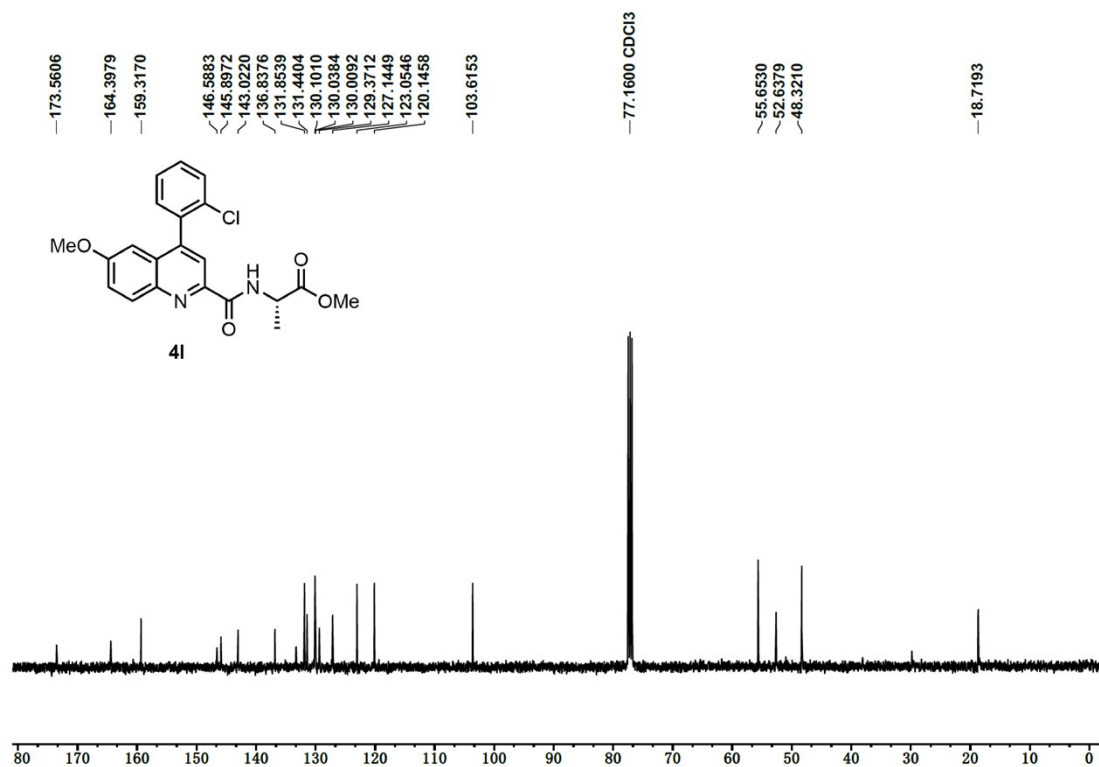

Supplement: d2cc07071e1.pdf [file d2cc07071e1.pdf]
